# Supplementary material
Source: Research Square preprint supplement (doi:10.21203/rs.3.rs-8366173/v1)
Supplement: Supplementary file 1 [file f3dcc5301566e18a41a13efc.pdf]

1                    Spatially-Informed Demand-Side Policies for Green  
2                    Hydrogen Diffusion in Europe - Supplementary Notes

3    **Contents**

|    |                                                                                                        |           |
|----|--------------------------------------------------------------------------------------------------------|-----------|
| 4  | <b>1 Supplementary Notes to Diffusion, Cost Competitiveness and Spatial Spillovers</b>                 | <b>1</b>  |
| 5  | 1.1 SN1: European H <sub>2</sub> policy landscape . . . . .                                            | 1         |
| 6  | 1.2 SN2: Defining spatial spillovers . . . . .                                                         | 3         |
| 7  | 1.3 SN3: Natural gas power generation as historical analogue for green H <sub>2</sub> demand . . . . . | 5         |
| 8  | <b>2 Supplementary Notes to Spatial Spillover Potentials for informing H<sub>2</sub> Policymaking</b>  | <b>20</b> |
| 9  | 2.1 SN5: Projection of future cost competitiveness . . . . .                                           | 20        |
| 10 | 2.2 SN6: Competition for alternative decarbonization technologies and saturation rates . . . . .       | 23        |
| 11 | 2.3 SN7: Demand projections under different carbon price regimes . . . . .                             | 44        |
| 12 | 2.4 SN8: Policy effectiveness under alternative baseline demand projections . . . . .                  | 46        |
| 13 |                                                                                                        |           |
| 14 | <b>3 Supplementary Note to Methods</b>                                                                 | <b>50</b> |
| 15 | 3.1 SN9: Build-up of sectoral offtaker databases . . . . .                                             | 50        |

16    **Contents**

17    **1 Supplementary Notes to Diffusion, Cost Competitiveness**  
18        **and Spatial Spillovers**

19    **1.1 SN1: European H<sub>2</sub> policy landscape**

20    The EU has set ambitious targets for green H<sub>2</sub> deployment. By 2030, it aims to produce 10 Mt  
21    domestically and import an additional 10 Mt from outside the EU.<sup>1</sup> To advance these objectives, the  
22    EU and 18 of its 27 Member States have adopted dedicated green H<sub>2</sub> strategies.<sup>1,2</sup> These strategies  
23    are supported by a portfolio of policy instruments. To establish the institutional context neces-  
24    sary for interpreting our results, we provide an overview of these policies (as of February 2026) in  
25    [Supplementary Table 1](#).

**Supplementary Table 1** Overview of policy instruments relevant for green H<sub>2</sub> (structured into EU and member state level, and H<sub>2</sub> vs technology neutral; then sorted by funding volume)

| Instrument                         | Level                 | Technology             | Description                                                                                                                                                                                                                             | Type   | Sector-based         | Place-based | Allocation mechanism                                                                                                                                                    | Funding                                                                                                  | Source |
|------------------------------------|-----------------------|------------------------|-----------------------------------------------------------------------------------------------------------------------------------------------------------------------------------------------------------------------------------------|--------|----------------------|-------------|-------------------------------------------------------------------------------------------------------------------------------------------------------------------------|----------------------------------------------------------------------------------------------------------|--------|
| European Hydrogen Bank (EHB)       | EU                    | H <sub>2</sub>         | Fixed-premium auctions supporting renewable H <sub>2</sub> production projects to reduce the cost gap between H <sub>2</sub> and fossil incumbents.                                                                                     | Supply | Partly <sup>i</sup>  | No          | Competitive auction; pass/fail eligibility screening (financial maturity, “do-no-harm”, additionality); qualified projects ranked by bid price until budget exhaustion. | EUR 3.3 bn total (EUR 1.3 bn in 3rd 2025 auction) funded through the Innovation Fund.                    | 3,4    |
| European Hydrogen Valleys          | EU                    | H <sub>2</sub>         | Portfolio of grant-based instruments intended to create regional H <sub>2</sub> ecosystems covering the full H <sub>2</sub> value chain, including production, infrastructure and end-use.                                              | Mixed  | No                   | Yes         | Multi-criteria evaluation (project scale, value chain integration, geographic scope, sector diversity)                                                                  | EUR 250 mn total (EUR 80 mn in 2025 call) under Horizon Europe / Hydrogen Joint Undertaking.             | 5      |
| Innovation Fund (regular calls)    | EU                    | Neutral                | Competitive support for innovative early-stage decarbonization projects (H <sub>2</sub> projects are eligible).                                                                                                                         | Supply | No                   | No          | Composite scoring reflecting cost efficiency, abatement potential, innovation, maturity and scalability; funding allocated to highest-scoring projects.                 | EUR 40bn between 2020-2030, 2.9 bn in 2025 funded by ETS revenues; ~1/3 to green H <sub>2</sub> .        | 6      |
| EU Just Transition Fund            | EU                    | Neutral                | Regional grants supporting economic restructuring in regions disproportionately affected by the energy transition; H <sub>2</sub> eligible if aligned with territorial plan objectives.                                                 | Mixed  | No                   | Yes         | Allocation via approved territorial just transition plans and associated project pipelines.                                                                             | EUR 19.7 bn total (not specific to green H <sub>2</sub> ).                                               | 7      |
| Mandatory portfolio standards      | EU                    | Neutral <sup>iii</sup> | Regulatory obligations mandating minimum shares for low-carbon fuels and energy carriers in aviation, maritime and industrial H <sub>2</sub> use.                                                                                       | Demand | Yes                  | No          | Quota or intensity mandates.                                                                                                                                            | Regulatory instrument (no budget).                                                                       | 8–10   |
| IPCEI Hydrogen                     | Member state          | H <sub>2</sub>         | State-aid framework enabling member states to support strategically relevant H <sub>2</sub> value-chain projects.                                                                                                                       | Mixed  | Partly               | No          | Assessed under IPCEI compatibility rules and strategic relevance; no single EU-wide ranking procedure.                                                                  | Approved state aid EUR 5.4 bn (Hy2Tech), EUR 7 bn (Hy2Use), EUR 5.4 bn (Hy2Infra), EUR 1.4 bn (Hy2Move). | 11,12  |
| Klimaschutzverträge (German CCFDs) | Member state (DE)     | Neutral                | Fixed CO <sub>2</sub> price for verified emissions reductions over a defined period, with payments adjusted to the EU ETS price, thereby compensating the incremental cost of technology switching and reducing investment uncertainty. | Demand | Yes                  | No          | Ranked by cost per ton CO <sub>2</sub> avoided.                                                                                                                         | EUR 6 bn (2026 budget).                                                                                  | 13     |
| H2Global                           | Member state (DE, NL) | H <sub>2</sub>         | Double-auction mechanism that matches long-term supply contracts with shorter-term offtake tenders and bridges price gaps to enable market formation and improve H <sub>2</sub> bankability.                                            | Supply | Partly <sup>ii</sup> | No          | Weighted bid score (90% price, 10% delivery quantity) with additional qualification criteria.                                                                           | Germany: EUR 3 bn (2026); Netherlands: EUR 33 mn.                                                        | 14     |

*Notes:* <sup>i</sup> 3rd auction is structured into three topics: Renewable Fuel from Non-Biological Origin (RFNBO)-General, RFNBO and Electrolytic Low-carbon H<sub>2</sub>-General, and Maritime and Aviation. <sup>ii</sup> Structured by H<sub>2</sub> derivative or product category. <sup>iii</sup> ReFuelEU Aviation mandates a minimum share of RFNBO e-fuels (35%). Note that this table does not aim to be fully exhaustive with respect to member state-level policies under which H<sub>2</sub> may be eligible.

26 The largest share of EU-level public funding is allocated through supply-side measures, most  
27 notably the European Hydrogen Bank (EHB) auctions funded through the Innovation Fund. At the  
28 same time, several instruments – such as the European Hydrogen (EU H<sub>2</sub>) Valleys and member state-  
29 level programs – are mixed or incorporate demand-side elements. Germany’s H<sub>2</sub> Global program,  
30 for example, is designed to match long-term supply contracts with shorter-term offtake agreements,  
31 which reduces offtake risk and the price gap with respect to fossil incumbents. As offtake risk is an  
32 important barrier to financing H<sub>2</sub> projects,<sup>15</sup> this is a highly relevant aspect of policy-making: in  
33 the second EHB auction (grant agreements completed in January 2026), signed contracts amounted  
34 to only EUR 271 mn, compared to a budget of EUR 1.2 bn (22.5%). The attrition partially reflects  
35 uncertainty with regard to size and structure of demand.<sup>16</sup>

36 While the highest-volume instruments, most notably the EHB auctions, allocate support almost  
37 exclusively on the basis of subsidy requirements, several programs incorporate additional criteria  
38 aligned with broader strategic objectives. In particular, the EU H<sub>2</sub> Valleys initiative explicitly seeks to  
39 create regional institutional capacity and “anchor” demand and supply, closely related to the concept  
40 of spatial spillovers explored in this paper (see [Supplementary Note 2](#)).<sup>5</sup> IPCEI Hydrogen aims to  
41 strengthen European competitiveness in strategic sectors and establish integrated value chains. The  
42 EU Just Transition Fund, in turn, emphasizes regional resilience and structural transformation.<sup>11</sup>

43 Our research design reflects the existing European policy landscape in three ways. First, we  
44 examine whether, controlling for sector, cost competitiveness and size, directing support towards green  
45 H<sub>2</sub> offtakers that are spatially central leads to more favorable policy outcomes, in terms of policy cost  
46 competitiveness, than a spatially-neutral allocation. In other words, we assess whether instruments  
47 that allocate support primarily on the basis of cost competitiveness could yield superior outcomes  
48 if they incorporated qualitative demand-side considerations such as spatial centrality, as is routinely  
49 done, for example, in offshore wind auctions.<sup>17,18</sup> Second, while the empirical focus of our research lies  
50 on demand-side interventions, our results are directly transferable to supply-side instruments, most  
51 notably EHB auctions: to this purpose, we assess whether incorporating demand-side elements, in the  
52 present case a demand-side spatial spillover criterion, into an EHB-style supply-side auction improves  
53 policy cost effectiveness, the key EHB policy objective, compared to an award mechanism based solely  
54 on subsidy requirements. Third, we assess whether policy instruments that already incorporate spatial  
55 considerations, such as the EU H<sub>2</sub> Valleys program, whose stated objective is to “kickstart” a low-  
56 carbon H<sub>2</sub> economy, target regions with high spatial spillover potential. This approach enables us to  
57 formulate policy recommendations that connect explicitly to the existing European policy framework  
58 (see the Discussion in the main article).

## 59 1.2 SN2: Defining spatial spillovers

60 The rate of diffusion of energy technologies reflects a trade-off between cost and risk for entrants rel-  
61 ative to incumbent technologies, but it is also shaped by factors that extend beyond techno-economic  
62 considerations. This includes a broader set of technology- and system-specific characteristics that  
63 affect the perceived risk and feasibility of technology adoption. Technology-specific characteristics  
64 include modularity, that is, the extent to which a technology is composed of self-contained and stan-  
65 dardized units, and retrofitability, or the degree to which a technology can be integrated into existing  
66 assets. Another important factor is whether the technology depends on a new system that entails new  
67 infrastructure, related technologies and institutions, such as established market arrangements and  
68 legal frameworks that enable trade in the technology.<sup>19,20</sup> The relative importance of these factors  
69 may depend on the stage of technology diffusion.<sup>20</sup>

70 In this context, spatial spillovers are defined as demand-side interdependencies where the presence  
71 of existing adopters increases the likelihood of adoption for installations in geographic proximity.  
72 In economic terms, spatial spillovers can be interpreted as positive spatial externalities that affect  
73 adoption probabilities through non-price channels. These spillovers can occur both on a firm or  
74 individual level<sup>21–23</sup> and on a regional level, where a high level of adoption in one geography has a  
75 positive effect on adoption in a neighboring region.<sup>24–26</sup>

76 The economic geography literature and the literature on the diffusion of energy technologies  
77 document several possible parallel mechanisms that support the presence of spatial spillovers. In the

78 case of green H<sub>2</sub> demand, these include shared infrastructure, supply-chain materialization, knowledge  
79 spillovers, peer and neighborhood effects and policy spillovers. Below, we summarize the most relevant  
80 mechanisms and explain how they are relevant for the diffusion of green H<sub>2</sub> demand.

81 *Shared infrastructure:* Energy technologies that are not fully modular and retrofittable often  
82 depend on the concurrent development of complementary infrastructure, including supply, transmis-  
83 sion, distribution, storage, and associated market arrangements.<sup>20,27</sup> This was the case, for example,  
84 for the diffusion of natural gas-based power generation, which required the scale-up of upstream  
85 gas extraction, pipeline transmission and distribution networks and gas markets.<sup>20</sup> A similar logic  
86 applies to green H<sub>2</sub> demand, which depends on the expansion of renewable generation and electroly-  
87 sis capacity and, depending on the production configuration, transmission, distribution, and storage  
88 infrastructure, as well as markets for trade.<sup>28</sup> In both cases, infrastructure investments are spatially  
89 concentrated and generate benefits for nearby adopters, making shared infrastructure a central source  
90 of spatial spillovers.

91 *Supply-chain materialization:* Beyond shared infrastructure, technology diffusion relies on the local  
92 presence of equipment and raw material suppliers, as well as specialized engineering and installation  
93 capabilities (e.g., for setting up shared infrastructure or retrofitting production facilities for the use  
94 of a new energy technology). Spatial spillovers can result from the co-location of these suppliers and  
95 service providers and industrial users. In the case of heat pumps, for example, spatial spillovers have  
96 been linked to supply-chain materialization in installation capabilities.<sup>21</sup> While demand for green H<sub>2</sub>  
97 is heterogeneous, as processes differ across sectors ([Supplementary Note 6](#)), similarities remain in the  
98 need for equipment, engineering, and installation capabilities, at least with respect to shared supply,  
99 transmission, distribution, and storage infrastructure. Further, co-location of suppliers and service  
100 providers often occurs across different components or technologically related industries, which makes it  
101 possible for supply chain materialization to occur even for distinct green H<sub>2</sub> demand applications.<sup>29-31</sup>

102 *Knowledge spillovers:* Diffusion also depends on tacit knowledge that is not fully codified and is  
103 transmitted through direct interaction, learning-by-doing, and repeated project development. Even  
104 where technical knowledge is largely codified, tacit knowledge often remains important for system  
105 integration, retrofitting, and operational learning: in renewable energy generation, spatial spillovers  
106 have been linked to localized knowledge stocks, proximity to research institutions, and regionally tar-  
107 geted public research support.<sup>24</sup> As with supply-chain materialization, similar dynamics are plausible  
108 for green H<sub>2</sub> demand.

109 *Peer and neighborhood effects:* Spatial spillovers may arise through imitation and neighborhood  
110 effects, whereby actors update beliefs and expectations based on observed adoption by peers. Such  
111 effects have been documented for a range of energy technologies, including rooftop photovoltaics<sup>22,23</sup>  
112 and electric vehicles.<sup>32</sup> Notably, these studies focus on consumer-facing technologies. While peer and  
113 neighborhood effects are likely to operate differently in firm or industrial settings, we cannot exclude  
114 that they may still condition adoption decisions.

115 *Policy spillovers:* Diffusion can be shaped by geographically bounded policies and regulations.  
116 “Policy spillovers” can arise, for example, when the success of a policy in one jurisdiction induces  
117 adoption of similar policies in neighboring jurisdictions.<sup>33</sup> Although many green H<sub>2</sub> support programs  
118 are administered at the EU level ([Supplementary Table 1](#)), similar mechanisms remain plausible in  
119 the case of green H<sub>2</sub>.

120 Much of the existing literature on spatial spillovers in green energy technologies focuses on  
121 consumer-facing technologies, including rooftop photovoltaics,<sup>23</sup> electric vehicles,<sup>32</sup> solar-battery  
122 integration<sup>34</sup> and heat pumps<sup>21</sup> and often emphasizes peer and neighborhood effects as well as supply-  
123 chain materialization. Spillovers have also been documented beyond consumer-facing technologies, for  
124 example for renewable portfolio standards<sup>26</sup>. We posit that in the case of green H<sub>2</sub>, spatial spillovers  
125 will partly follow those observed for consumer-facing technologies but operate primarily through the  
126 first three mechanisms listed above, shared infrastructure, supply-chain materialization, and knowl-  
127 edge spillovers. This mirrors the structure of spatial spillovers in natural gas power generation (see  
128 [Supplementary Note 3](#) for a detailed discussion of these parallels).

### 1.3 SN3: Natural gas power generation as historical analogue for green H<sub>2</sub> demand

To guide our choice of historical analogue and document it transparently, we draw on Roberts and Nemet’s Systematic Historical Analogue Research for Decision-making (SHARD) approach.<sup>35</sup> SHARD offers a structured and theory-informed framework to identify historical cases that exhibit structural similarity to a target technology. Rather than requiring similarity across all dimensions, the approach prioritizes alignment along those characteristics that are central to the analytical objective.

To select the most appropriate analogue, we proceed in four steps, where the first three steps follow the SHARD procedure and the fourth includes additional considerations on the robustness of our analogue choice. First, we clarify the objective of the historical analogue search. Second, we define a set of target characteristics for green H<sub>2</sub> demand based on the SHARD dimensions and, to reflect the core of our study, spatial spillover mechanisms (Supplementary Note 2). Third, we select an analogue from a broad set of available technology datasets based on the closest analytical fit to green H<sub>2</sub> demand, again considering both the SHARD dimensions and spatial spillover mechanisms. Finally, we address specific considerations that are critical for assessing the fit between green H<sub>2</sub> and natural gas power plants, our selected historical analogue.

#### Step 1: Clarification of research objective

We begin by clarifying the research objective. In our study, the historical analogue provides the empirical foundation to construct a model of green H<sub>2</sub> demand that is driven primarily by cost competitiveness and spatial spillovers. We then use forward-looking projections from this model as a baseline for policy evaluation. Therefore, the central requirement for the historical analogue is that its historical diffusion process structurally resembles that expected for green H<sub>2</sub>. In particular, the spatial spillovers observed in the analogue context must be transferable to green H<sub>2</sub> demand. Concretely, the analogue must exhibit the core spatial spillover mechanisms identified for green H<sub>2</sub> in Supplementary Note 2, namely shared infrastructure, supply chain materialization and knowledge spillovers.

#### Step 2: Assessment of target characteristics for green H<sub>2</sub> demand

##### *Target characteristics based on the SHARD method*

For identifying target characteristics, Roberts and Nemets propose structuring the analysis across five domains: technological and infrastructural characteristics, economic and financial characteristics, policy and political characteristics, social and cultural characteristics and user and consumption characteristics.<sup>35</sup> Importantly, the focus of our research is green H<sub>2</sub> demand and not production. Many important characteristics of H<sub>2</sub> production – such as siting flexibility or feedstock variability – are therefore not directly relevant to this exercise.

*Technological and infrastructural characteristics:* Malhotra and Schmidt propose evaluating technological characteristics with particular attention to design complexity and the need for customization.<sup>36</sup> H<sub>2</sub> is of low volumetric energy density and specific handling requirements, rendering it technically more complex than conventional fuels. Although green H<sub>2</sub> demand spans multiple use cases, these are characterized by similarly high levels of complexity, with multiple sub-components integrated into complex processes and systems, as well as significant customization needs driven by site-specific conditions such as access to H<sub>2</sub> infrastructure. This infrastructure, encompassing supply, transport, storage, and delivery, is consistent and shared across all green H<sub>2</sub> demand applications. Storage plays a central role in smoothing load profile variability; salt caverns are promising but geographically constrained, while above-ground tanks are costly and limited in scale.<sup>37</sup> Adoption frequently requires partial or complete redesign of existing processes or equipment, and modularity and standardization remain limited across sectors.<sup>37,38</sup> In addition, many offtake sectors require high purity and pressure levels, which further increase complexity at the interface between supply and demand.<sup>38</sup>

The spatial distribution of demand reflects existing industrial structures, for example for refining, steel, and chemicals (such as ammonia or methanol), although it may somewhat shift when additional demand sources, where green H<sub>2</sub> is less competitive to other decarbonization options (such as heating,

179 see [Supplementary Note 6](#)), are considered. Infrastructure interdependencies are extensive: demand-  
180 side adoption is often conditional on concurrent progress in H<sub>2</sub> delivery and storage infrastructure.  
181 Leveraging existing natural gas infrastructure could ease build-out requirements,<sup>39</sup> but requires the  
182 resolution of technical challenges related to structural integrity and safety of operations.<sup>40,41</sup>

183 *Economic and financial characteristics:* Green H<sub>2</sub> to date remains economically uncompetitive  
184 with fossil incumbents (1-5 times more expensive) depending on the sector and geography, even  
185 though costs are expected to decrease significantly.<sup>42</sup> Still, green H<sub>2</sub> costs and pricing are highly  
186 uncertain, and dependent on the trajectory of several uncertain input components, including renew-  
187 able electricity, electrolyzer costs and carbon prices.<sup>43</sup> Capital intensity is high for conversion and  
188 retrofit of demand-side assets, with long payback periods and high sensitivity to utilization rates.<sup>38</sup>  
189 Offtake agreements are closely tied to financing conditions and usually long term. Bloomberg New  
190 Energy Finance’s (BNEF) offtaker database reports a median contract length of 15 years, with a  
191 range between 7 and 30 years.<sup>44</sup> Similarly, existing policy support measures including CfD regimes  
192 typically range between 10 and 15 years.<sup>45</sup>

193 *Policy and political characteristics:* The EU as well as 18 of its national governments have adopted  
194 green H<sub>2</sub> strategies.<sup>1,2</sup> Existing policy measures include primarily supply-side auctions administered  
195 by the European H<sub>2</sub> bank<sup>46</sup> and demand-side portfolio standards for industrial H<sub>2</sub>,<sup>10</sup> aviation<sup>8</sup> and  
196 shipping.<sup>9</sup> Eligibility for incentives is often tied to stringent certification criteria (e.g. additionality)<sup>47</sup>  
197 increasing complexity. A detailed overview of policy instruments is provided in [Supplementary Table](#)  
198 [1](#). In the context of policy and political characteristics, the purpose of the empirical model is to  
199 provide a projection that can serve as a baseline for subsequent policy evaluation. Accordingly, the  
200 technology analogue should, as far as possible, abstract from current policy support mechanisms while  
201 still reflecting the structural features that condition H<sub>2</sub> demand adoption in key sectors.

202 *Social and cultural characteristics:* Social acceptance of green H<sub>2</sub> varies by sector and end use. It  
203 is seen as a high-credibility solution for hard-to-abate industrial applications but faces skepticism in  
204 low-temperature heat or passenger transport.<sup>48</sup>

205 *User and consumption characteristics:* Green H<sub>2</sub> competes not only with fossil incumbents but  
206 also with alternative low-carbon options such as direct electrification, and carbon capture, utilization  
207 and storage (CCUS).<sup>37</sup> Demand potential is concentrated with large customers in sectors where these  
208 other decarbonization technologies are either technically unfeasible or economically less competitive.  
209 These include high-temperature industrial heat (e.g., steel, ceramics, glass), chemical feedstocks (e.g.,  
210 ammonia, methanol), and selected transport modes (aviation, maritime, heavy duty transport) (see  
211 [Supplementary Note 6](#)). Retail offtake is limited to a narrow range of applications (heat, road trans-  
212 port), where technical efficiency and cost competitiveness typically fall short of other decarbonization  
213 alternatives.<sup>49,50</sup>

#### 214 *Target characteristics based on spatial spillover mechanisms*

215 In addition to the dimensions proposed in the SHARD process, our historical analogue assessment  
216 also incorporates the structure of spatial spillovers, following the mechanisms identified in [Supple-](#)  
217 [mentary Note 2](#). In the case of green H<sub>2</sub>, we expect spatial spillovers to occur primarily through  
218 shared infrastructure, supply chain materialization and knowledge spillovers.

219 Green H<sub>2</sub> demand relies strongly on the concurrent scale-up of infrastructure that connects demand  
220 to supply, including transmission, distribution and storage infrastructure. This induces strong spatial  
221 interdependencies in the adoption of green H<sub>2</sub> by installations in geographic proximity, related to the  
222 presence and the possibility to share the cost for this infrastructure.

223 Green H<sub>2</sub> demand covers several processes across transport, heating, and industry. These include  
224 fuel and fuel cell applications in transport, process heat, and the use of green H<sub>2</sub> as a feedstock in  
225 refining, chemicals, and iron & steel. While this diversity may somewhat moderate spillovers aris-  
226 ing from highly specialized supply chains and sector-specific knowledge, significant spatial spillovers  
227 from supply chain development and knowledge diffusion can still be expected (see Step 4 – special  
228 considerations for further detail). Importantly, green H<sub>2</sub> demand applications and technologies are  
229 structurally comparable in terms of complexity and customization needs. This supports cross-sector

230 linkages, including shared requirements for equipment manufacturing, engineering services, and instal-  
231 lation capabilities. Since all applications rely on common green H<sub>2</sub> supply infrastructure, spillovers  
232 linked to both supply chain materialization and knowledge exchange are also likely to arise through  
233 shared infrastructure development (see [Supplementary Note 2](#)).

234 The intensity of spatial spillovers depends on the overall extent of diffusion. If a technology diffuses  
235 only marginally, the resulting spillovers are likely to be limited. Importantly, in the present setting  
236 this does not affect the selection of a historical analogue. We control for these feedback mechanisms  
237 through the choice of saturation rates in the main analysis (see Methods and [Supplementary Note](#)  
238 [6](#)). Lower saturation rates mechanically result in lower spillover pressure, whereas higher saturation  
239 rates imply stronger spillover pressure, irrespective of the saturation level observed for the historical  
240 analogue. We therefore focus exclusively on structural comparability.

### 241 **Step 3: Selection of natural gas power plants as historical analogue from a technology** 242 **long list**

243 Next, we evaluate a long list of potential technology analogues against the characteristics outlined  
244 above, as well as our study objectives. A common starting point for creating such a list is the His-  
245 torical Adoption of Technologies (HATCH) database, which aggregates data from sources including  
246 peer-reviewed literature, the International Energy Agency, and the U.S. Energy Information Admin-  
247 istration, to provide time series characterizing the diffusion of technologies in native units.<sup>51</sup> An  
248 important requirement for our analysis is the availability of high-quality data that is both longitu-  
249 dinal and spatially explicit, enabling the study of spatial technology diffusion. The HATCH dataset  
250 is aggregated at the regional or national level and does not provide sub-national or installation-level  
251 information. In line with our research focus, it is therefore not suitable as a long list for analogue  
252 selection. However, it can serve as an initial screening tool to assess technology fit and to identify candi-  
253 date technologies for which high-quality, longitudinal, and spatially explicit data may be available  
254 from other sources.

255 In its 1.5 version, the HATCH database includes 202 technologies. As a first step, we make a broad  
256 selection based on sector, excluding technologies related to consumer demand (42), healthcare (15),  
257 digital (14), agriculture (10), machinery (5), and the public sector (3). These are not comparable to  
258 H<sub>2</sub> in terms of basic technology and infrastructure characteristics, and their dispersed nature makes  
259 the availability of spatial diffusion data unlikely. We also eliminate technologies that are “pure” infras-  
260 tructure such as road, rail, pipeline, and water infrastructure (6). For the remaining 120 technologies,  
261 we review data availability.

262 S&P Capital IQ provides detailed data on power plants, including capacity, service years, and  
263 locations. Similar data exists for mining operations, though coverage is partial, with service years  
264 missing for around 4,000 of 9,700 installations. Global Energy Monitor provides open datasets on oil  
265 and gas infrastructure and steel plants, including operation dates and geo-location. The EU ETS and  
266 the European Pollutant Release and Transfer Register (E-PRTR) cover a wide range of industrial  
267 emitters, but data availability is limited to post-2005 (ETS) and post-2007 (E-PRTR), making them  
268 unsuitable for modelling full diffusion processes. We are not aware of other technologies for which  
269 spatially explicit, longitudinal data is publicly available.

270 This yields the following long list of technologies that combine a broad sectoral match with data  
271 availability:

- 272 • Power plants: Biogas, coal, geothermal, hydro, marine, natural gas, nuclear, pumped hydro, solar  
273 (CSP, PV, thermal), wind (offshore, onshore)
- 274 • Oil and gas production: Natural gas, oil (conventional, shale)
- 275 • Metals and mining: Coal, cobalt, copper, gold, graphite, iron, lead, lithium, magnesium, rare  
276 earths, silver, steel production, tin, titanium sponge, zinc

277 While data is available for all of these technologies, data coverage and sample size vary substan-  
278 tially. For example, in the case of biogas or coal plants, the number of plants that could be considered  
279 are less than 100. Similarly, steel production plants are limited to around 80 across all production

280 routes. This limits their applicability for use in an empirical model of technology adoption. Based  
281 on the characteristics of green H<sub>2</sub> demand outlined above, we identify natural gas power plants and  
282 renewable power plants (e.g., wind) as the most promising candidates. While renewable power plants  
283 have been used as analogues for green H<sub>2</sub> supply,<sup>52</sup> we consider natural gas power plants the more  
284 appropriate analogue for green H<sub>2</sub> demand. Natural gas power plants closely match the basic techno-  
285 logical, economic, policy, social, user and cultural characteristic dimensions of the SHARD framework,  
286 and align well with the structural diffusion mechanics expected for green H<sub>2</sub>, in particular with regard  
287 to spatial spillover mechanisms (see detailed considerations below).

288 *Analytical fit between green H<sub>2</sub> demand and natural gas power generation along SHARD*  
289 *characteristics*

290 Green H<sub>2</sub> demand and natural gas power plants are similar in terms of technological and infras-  
291 tructure characteristics. H<sub>2</sub> and natural gas share key physical attributes: both are gaseous and  
292 fugitive, with similar characteristics for transport, transmission, and storage.<sup>40</sup> Natural gas power  
293 plants and green H<sub>2</sub> demand are also comparable in terms of technological complexity and the need  
294 for customization.<sup>36</sup> In both cases, technologies can be characterized as relatively complex systems  
295 with significant system integration requirements, where multiple interacting design elements and site-  
296 specific conditions necessitate project-level customization and infrastructure access. Importantly, both  
297 exhibit interdependencies between demand and infrastructure. This is less pronounced for renewable  
298 generation, which is connected to existing electricity grids, even though grid upgrades and additional  
299 reserves are likely required<sup>53</sup> and securing grid connections can be challenging.<sup>54</sup> Green H<sub>2</sub> demand  
300 and natural gas power plants also show similar spatial patterns, which broadly track industrial activ-  
301 ity and population centers (see Step 4 – additional considerations for further details on parallels in  
302 siting).

303 Economically, both natural gas and renewables were emerging technologies at the time of adoption,  
304 with negative cost spreads to incumbents and rapidly falling cost curves.<sup>55</sup>

305 From a policy and political perspective, in Europe, renewable power, in contrast to natural gas  
306 power plants, has received extensive policy support, extensive subsidies under feed-in tariffs and auc-  
307 tion regimes. In 2021, the year before the start of the war in Ukraine, renewables subsidies amounted  
308 to EUR 83bn, versus EUR 10bn for natural gas.<sup>56</sup> While H<sub>2</sub> is also likely to require policy support,<sup>42</sup>  
309 the aim of our model is to establish a policy-neutral baseline. Using renewable power as an analogue  
310 risks embedding policy effects in the baseline. Natural gas power, by contrast, was subject to more  
311 limited direct support. A potential caveat is that natural gas prices and availability are partially  
312 shaped by geopolitics.<sup>57</sup> However, this also applies to H<sub>2</sub> (see, e.g., Van de Graaf et al<sup>58</sup> for a qual-  
313 itative assessment of the interplay between H<sub>2</sub> trade and international relations), which is expected  
314 to rely heavily on imports under EU 2030 targets.<sup>1</sup>

315 In terms of user and consumption characteristics, both green H<sub>2</sub> and natural gas power plants  
316 partly share a common user base: both are, to a significant degree, used by large-scale customers in  
317 industrial sectors – green H<sub>2</sub> as fuel and feedstock and natural gas power in the context of cogeneration  
318 plants. In the power sector and in some cogeneration plants, green H<sub>2</sub> can even be considered a  
319 substitute for natural gas.<sup>59</sup> There is no similar common user base for renewable generation.

320 *Analytical fit between green H<sub>2</sub> demand and natural gas power generation along spatial spillover*  
321 *mechanisms*

322 Natural gas power plants closely match the spatial spillover mechanisms expected for green H<sub>2</sub> (see  
323 above and [Supplementary Note 2](#)). The spatial patterns of natural gas power plants reflect technical  
324 and system-level characteristics such as electricity grid topology, shared supply infrastructure and  
325 proximity to demand centers, especially for cogeneration plants.<sup>60,61</sup> These demand centers, including  
326 large-scale industrial installations in sectors such as iron & steel, refining, chemicals and non-metallic  
327 minerals<sup>62</sup> or district heating,<sup>61,63</sup> are structurally comparable to green H<sub>2</sub> demand.<sup>62,63</sup> While site  
328 selection does not necessarily depend on the presence of prior plants per se, these characteristics  
329 generate strong spatial interdependencies, particularly through shared infrastructure and demand  
330 proximity. In some cases, green H<sub>2</sub> can even directly substitute for natural gas as a fuel.<sup>64</sup>

331 In terms of shared infrastructure, the expansion of natural gas power generation in Europe  
332 between 1963 and today coincided with the development of gas extraction, pipeline networks, LNG  
333 terminals, and market institutions. This co-evolution of infrastructure and demand created spatial  
334 interdependencies, as early infrastructure investments reduced adoption barriers for subsequent plants  
335 in nearby locations.<sup>28</sup> This dynamic resembles the expected evolution of green H<sub>2</sub> demand, where  
336 adoption decisions depend on the parallel development of production, transport, distribution, and  
337 storage infrastructure (Supplementary Note 2). Shared infrastructure therefore represents a central  
338 and transferable mechanism underlying spatial spillovers in both contexts.

339 Although green H<sub>2</sub> demand spans several use cases they remain structurally comparable to each  
340 other and to natural gas power plants with regard to design complexity and need for customization,  
341 indicating similar dynamics with regard to supply chain materialization and knowledge spillovers. For  
342 more details on how the presence of multiple H<sub>2</sub> demand use cases affect comparability, see additional  
343 considerations below.

#### 344 *Summary*

345 Based on our rigorous, formal selection process, along the SHARD framework and HATCH tech-  
346 nology database routinely used in the feasibility space literature,<sup>65</sup> natural gas power plants emerge  
347 as the closest available match to green H<sub>2</sub> demand from a structural and modeling perspective. This  
348 provides a rigorous foundation for our empirical analysis and forward-looking analysis.

349 Beyond matching structural characteristics, natural gas power plants also offer a key technical  
350 advantage over renewable generation: the diffusion curve for EU countries approaches saturation  
351 and shows a well-defined s-shape consistent with the typical shape of technology diffusion curves<sup>66</sup>  
352 (Supplementary Figure 1), while renewables remain subject to strong growth. This makes calibration  
353 on natural gas power plants more straightforward, as it can be based on a full diffusion curve.

#### 354 **Step 4: Special considerations on the analytical fit between green H<sub>2</sub> demand and** 355 **natural gas power plants**

##### 356 *Siting of green H<sub>2</sub> demand relative to natural gas power plants*

357 Although the siting of natural gas power plants can depend on many aspects, including access  
358 to natural gas supply, grid bottlenecks or proximity to demand centers,<sup>60,61</sup> siting decisions are  
359 structurally comparable to green H<sub>2</sub> and empirically correlated with the presence of other natural gas  
360 power plants. This reinforces the comparability of natural gas power plants and green H<sub>2</sub> demand,  
361 and the presence of spatial spillovers in both contexts.

362 Natural gas power plants frequently co-locate with large and steady demand sources, with a  
363 substantial share operating as cogeneration facilities. In our dataset, approximately 75% of natural  
364 gas power plants, accounting for roughly one third of installed capacity, are combined heat and power  
365 plants supplying industrial facilities or district heating networks (see Supplementary Figure 1).<sup>61–63</sup>  
366 These plants are embedded in industrial clusters and co-located with concentrated demand, generating  
367 spatial interdependencies through shared infrastructure, supply chains and knowledge exchange. In  
368 terms of spatial footprint and system integration, such cogeneration plants are comparable to green  
369 H<sub>2</sub> demand locations, which are likewise concentrated in industrial clusters.

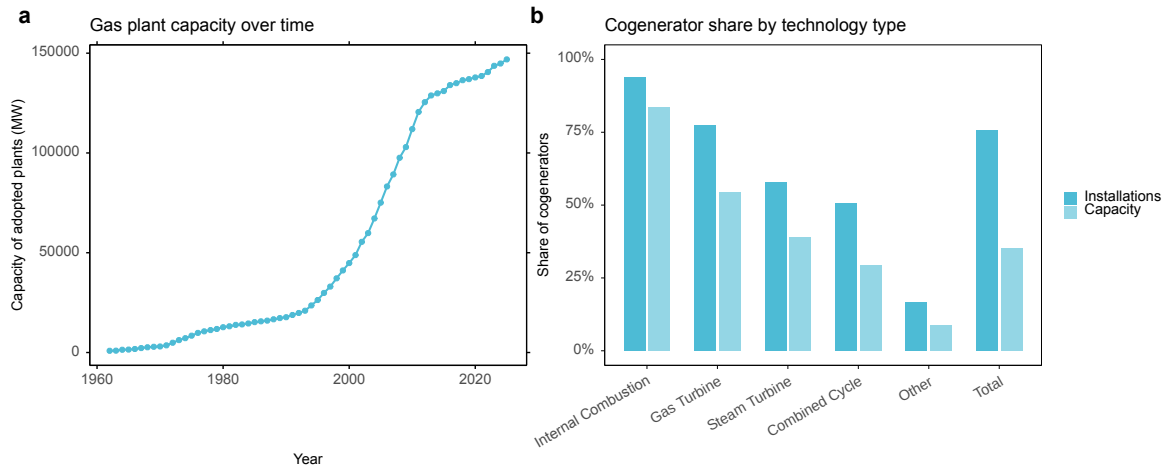

**Supplementary Figure 1 Natural gas power plants in the EU 1962-2024.** **a** Build-up of natural gas power plant capacity in the EU in MW. The dataset includes all operating and out-of-service natural gas power plants in the EU as of 31 December 2024. Observations with missing values in geographic coordinates and commissioning year are excluded; the capacity of power plant units in the same location is aggregated. This results in a total of 3493 power plants considered in the sample. **b** Share of natural gas power plants classified as cogeneration plants. Over 75% of installations, and over a third of capacity are cogeneration plants, with particular concentration in internal combustion and gas turbine plants.

370 We also find empirical evidence that new natural gas plants tend to be commissioned in clusters of  
 371 existing plants. To demonstrate this, we divide natural gas power plants by decade of commissioning.  
 372 For installations newly commissioned in each decade, we compute kernel densities based on the exist-  
 373 ing natural gas power generation footprint, using the locations of the new plants and 5,000 reference  
 374 points across the EU land mass, and sort them into percentiles. The median local density percentile  
 375 of newly commissioned plants consistently exceeds the 80th percentile in all decades, indicating that  
 376 new installations are strongly correlated with the location of existing plants (Supplementary Figure  
 377 2).

**Density percentile at natural gas power plant commissioning relative to EU land mass reference grid**

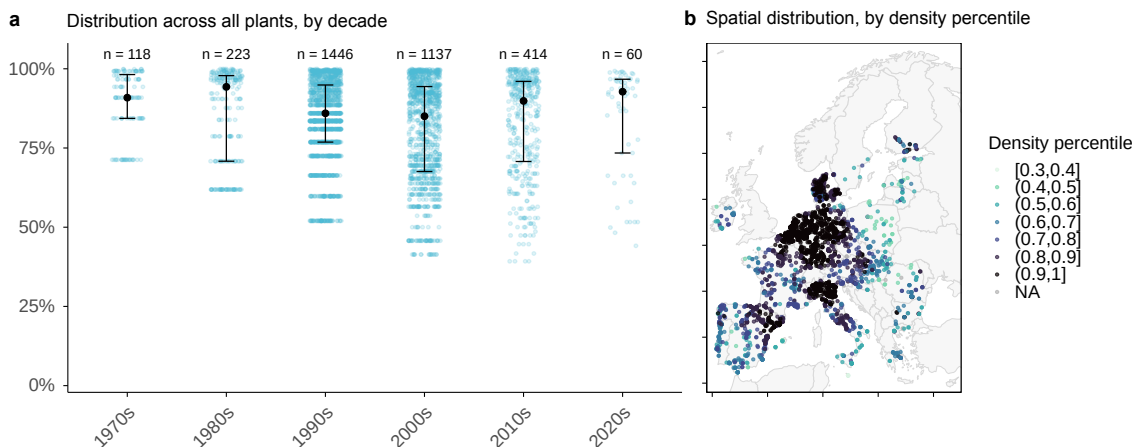

**Supplementary Figure 2 Spatial dependency of natural gas power plant siting over time** **a** Distribution of kernel density percentiles for the locations of newly commissioned plants by decade. Density percentiles are calculated relative to the spatial distribution of existing plants at the time of commissioning and benchmarked against 5,000 reference points across the European Union land mass. Blue points represent individual observations, black points the median and whiskers the interquartile distance. The median percentile exceeds 80% in every decade, indicating that at least half of all new plants are sited within the 20% most densely occupied locations based on the prior footprint, indicating spatial correlation over time. **b** Spatial distribution of natural gas power plants and corresponding density percentiles.

379 Green H<sub>2</sub> demand spans multiple use cases across transport, heating and industry. Despite  
380 this heterogeneity, these applications share structural characteristics that enable spatial spillovers  
381 through supply chain materialization and knowledge exchange, extending beyond shared fuel and  
382 infrastructure.

383 Structural similarity between technologies can be assessed by comparing their relative design com-  
384 plexity and need for customization.<sup>36</sup> Green H<sub>2</sub> end-use technologies are best characterized as complex  
385 products and systems (CoPS) rather than mass-produced commodities. CoPS technologies exhibit  
386 high design complexity, strong interdependencies between components, and substantial requirements  
387 for system integration and site-specific adaptation.<sup>36,67</sup> Innovation in such technologies typically pro-  
388 ceeds through iterative improvements at the component and subsystem level rather than through  
389 standardized mass production.<sup>30,31</sup> This innovation process relies on project-based engineering  
390 capabilities and specialized supplier networks that integrate multiple technical subsystems.

391 These characteristics have clear spatial implications. In CoPS industries, technological learning  
392 and innovation frequently emerge from close interaction between lead users and specialized suppliers.  
393 Empirical research shows that geographic proximity between component suppliers and lead users  
394 facilitates iterative problem solving, tacit knowledge exchange, and the accumulation of engineering  
395 capabilities.<sup>29,68</sup> In the context of green H<sub>2</sub>, lead users are typically large industrial installations in  
396 sectors such as iron & steel, chemicals, refining, and non-metallic minerals. The co-location of suppliers  
397 and industrial users can therefore reinforce spatial clustering and generate localized spillovers that  
398 lower adoption barriers for subsequent projects.

399 Evidence from other CoPS in the energy sector illustrates similar patterns across components.  
400 Wind turbines are customized, engineering-intensive systems in which innovation and cost reductions  
401 occur primarily at the component level rather than in the final assembly.<sup>30</sup> The manufacturing value  
402 chain consequently involves hundreds of specialized suppliers producing towers, blades, gearboxes, and  
403 control systems for a relatively small number of turbine manufacturers. Empirical analyses further  
404 document geographically concentrated supplier–manufacturer relationships, reflecting the importance  
405 of localized manufacturing capabilities and specialized engineering expertise within wind energy  
406 supply chains.<sup>30</sup>

407 Many specialized suppliers in green H<sub>2</sub>-related value chains operate across multiple technologically  
408 related industries. Firms producing compressors, turbines, high-pressure piping, cryogenic equipment,  
409 catalysts, and engineering services frequently serve power generation, chemicals, refining, and heavy  
410 industry. These overlapping capabilities create opportunities for cross-sector knowledge spillovers and  
411 reinforce spatial clustering in regions with strong engineering and industrial capabilities. For example,  
412 Rolls-Royce serves defense, civil aerospace, and power systems markets; within power systems it  
413 supplies marine, governmental, industrial, and power generation applications, often holding significant  
414 market shares.<sup>69</sup> GE Vernova manufactures equipment for major forms of power generation, including  
415 natural gas, H<sub>2</sub> combustion solutions, and several direct electrification technologies for industry.<sup>70</sup>

416 Beyond supply chain materialization and knowledge spillovers, one of the primary mechanism  
417 driving spatial spillovers in green H<sub>2</sub> demand – shared infrastructure for supply, transmission, stor-  
418 age, and delivery – is largely independent of end-use heterogeneity and closely comparable to the  
419 infrastructure requirements of natural gas.

420 Finally, natural gas power generation has itself historically exhibited substantial technological  
421 heterogeneity. Since initial deployment, it has undergone several technological waves, from steam  
422 turbines to gas turbines and internal combustion units to combined cycle gas turbines (see [Supple-  
423 mentary Figure 3](#)). These waves reflect learning processes, knowledge spillovers, and supply chain  
424 materialization specific to each configuration that can be viewed as similar to that of green H<sub>2</sub> demand.

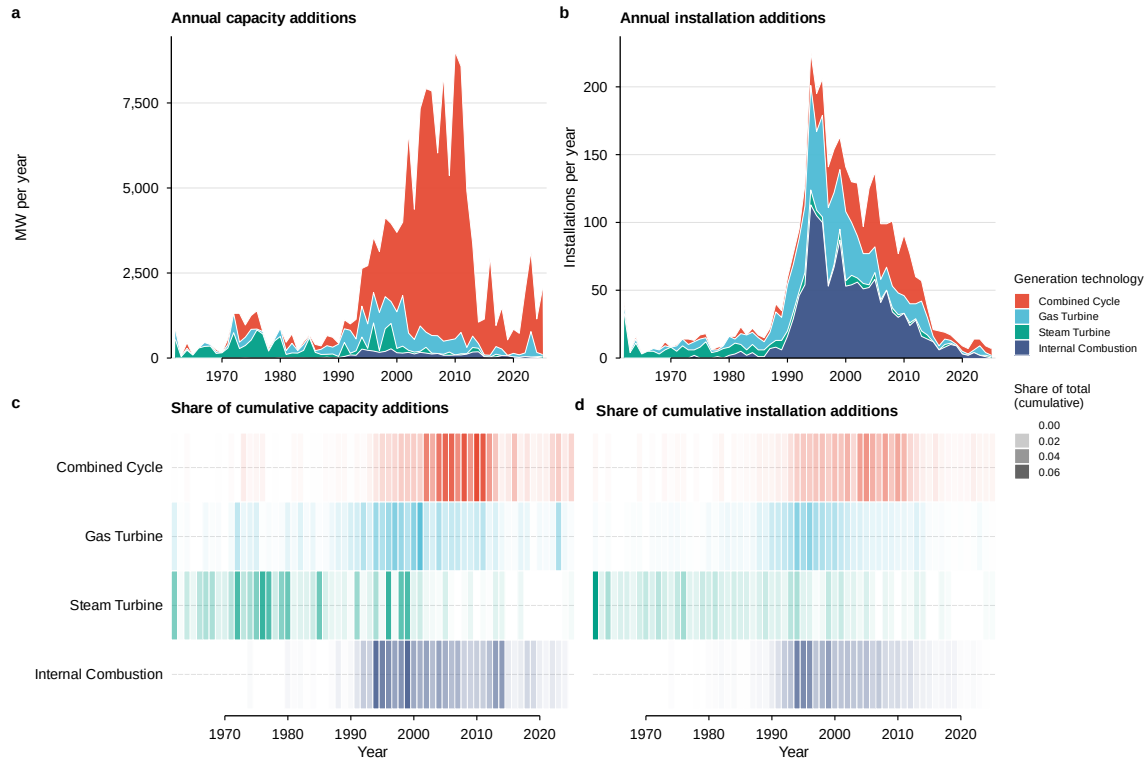

**Supplementary Figure 3 Natural gas power plant additions by year and generation technology.** **a** Capacity additions of natural gas power plants by year and generation technology (combined cycle, gas turbine, internal combustion, and steam turbine). **b** Additions of natural gas power plants measured by number of installations. **c** Share of capacity additions within a generation technology in a given year, expressed as a share of total capacity additions across all years. Results indicate distinct technology waves, from steam turbines to gas turbines and internal combustion plants, and subsequently to combined cycle turbines. **d** Share of installation additions within a generation technology in a given year, expressed as a share of total installation additions across all years.

#### 425 *Considerations on central versus decentral green H<sub>2</sub> supply*

426 In our analysis, we focus on green H<sub>2</sub> demand rather than supply, irrespective to whether it is  
 427 supplied through centralized or on-site production. We follow the literature in assuming that infras-  
 428 tructure, which can include renewable generation, transmission, distribution and storage systems, is  
 429 required to support green H<sub>2</sub> demand.<sup>39</sup> At a minimum, generation and storage infrastructure are  
 430 also required in a fully decentralized system, and benefit from infrastructure sharing, supply chain  
 431 materialization and local knowledge build-up. Spatial spillovers in the case of green H<sub>2</sub> are thus robust  
 432 across different supply configurations.

#### 433 **SN4: Robustness tests on the empirical model**

##### 434 **Empirical identification with alternative historical analogues**

435 The structured analysis of historical analogues in [Supplementary Note 3](#) demonstrates that natural  
 436 gas power plants are the most suitable historical analogue to build a spatially explicit model of  
 437 green H<sub>2</sub> diffusion over time. Still, as a robustness test, we explore to which degree our results and  
 438 conclusions hold for different definitions of historical analogues.

439 First, we restrict the sample of natural gas power plants to cogeneration plants only. Cogeneration  
 440 plants follow the structure of green H<sub>2</sub> demand, for example in terms of spatial patterns, even more  
 441 closely than natural gas power plants at large (see [Supplementary Note 3](#)). Second, we test an empiri-  
 442 cal identification based on wind power plants, which have been proposed as a historical analogue in

443 the case of green H<sub>2</sub> supply.<sup>52</sup> Data source (S&P Capital IQ), model specification and estimation  
 444 procedures remain unchanged (see Methods).

445 **Natural gas cogeneration plants**

446 Results for cogeneration plants (Supplementary Table 2) are fully consistent with the results for  
 447 natural gas power plants at large reported in the main article (Extended Data Table 1). In the  
 448 second pass regression, the coefficient on spatial spillovers is slightly higher (11.1 versus 10.7) and  
 449 the coefficient on distance of natural gas transmission corridors is significant and negative, albeit at  
 450 an extremely low magnitude (-0.0055). The remaining coefficients are materially unchanged.

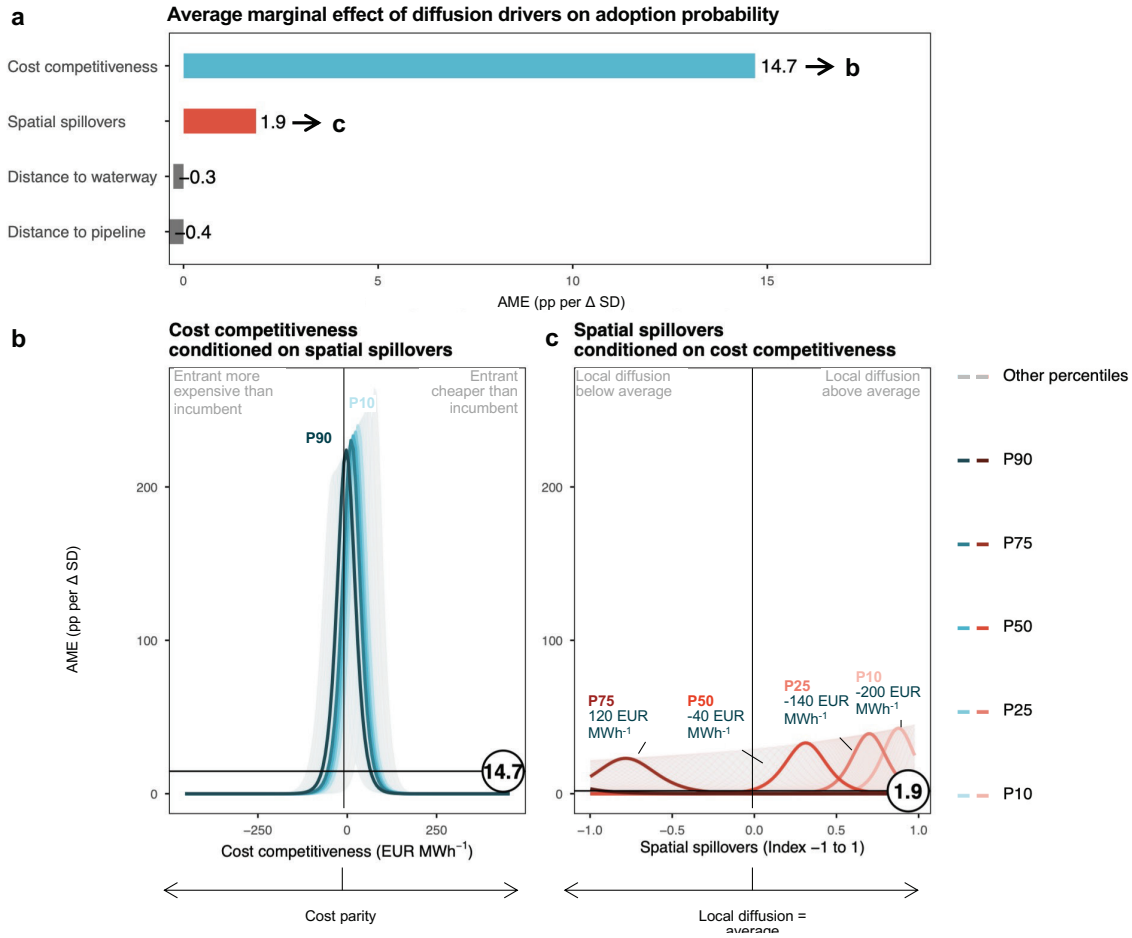

**Supplementary Figure 4 Average marginal effects of cost competitiveness and spatial spillovers on adoption using cogeneration plants as historical analogue.** **a** Average marginal effect (AME) of all independent variables. Cost competitiveness and spatial spillovers are the primary drivers of diffusion, with an AME of cost competitiveness (blue bar) approximately 8-times the AME of spatial spillovers (red bar).

**b-c** AME of cost competitiveness (**b**) and spatial spillovers (**c**), conditioned on each other. Colored lines denote the AME across the predictor's range for selected percentiles of the conditioning variable. The grey ribbon indicates the overall range of AMEs across all possible values of the conditioning variable. Horizontal black lines and annotations denote the overall AME. Vertical black lines denote zero values (cost parity and local diffusion = average diffusion). AMEs are derived from the logistic regression model in Supplementary Table 2 using a finite difference approximation and normalized using the variables' standard deviations.

451 The estimated marginal effect of spatial spillovers increasing slightly from 1.7 to 1.9 percentage  
 452 points per standard deviation (see Supplementary Figure 4a). The main results can therefore be

**Supplementary Table 2** GEE logistic regression estimates of adoption probability (AR(1) correlation structure)

| Variable                                               | First pass |          |        |            | Second pass |          |        |            |
|--------------------------------------------------------|------------|----------|--------|------------|-------------|----------|--------|------------|
|                                                        | Est.       | SE       | Wald   | <i>p</i>   | Est.        | SE       | Wald   | <i>p</i>   |
| Intercept                                              | -0.143     | 0.0304   | 22.02  | 2.7e-06*** | -0.784      | 0.0406   | 373.4  | <2e-16***  |
| Cost competitiveness ( $C_{i,t}$ )                     | —          | —        | —      | —          | 0.0622      | 0.000694 | 8037.1 | <2e-16***  |
| Spatial spillovers ( $S_{i,t}$ )                       | 2.159      | 0.125    | 297.93 | <2e-16***  | 11.092      | 0.402    | 760.8  | <2e-16***  |
| Distance to waterways ( $D_i^{\text{water}}$ )         | -0.000483  | 0.000178 | 7.39   | 0.00656**  | -0.002580   | 0.000437 | 34.9   | 3.5e-09*** |
| Distance to pipeline corridors ( $D_i^{\text{pipe}}$ ) | -0.002207  | 0.001610 | 1.88   | 0.1706     | -0.005511   | 0.001233 | 20.0   | 7.8e-06*** |
| Interaction: $C_{i,t} \times S_{i,t}$                  | —          | —        | —      | —          | -0.02210    | 0.00388  | 32.5   | 1.2e-08*** |

Notes: Output from two generalized estimating equation (GEE) logistic regression models with an AR(1) correlation structure. The first-pass model includes spatial spillovers and distances to waterways and pipeline corridors. The second-pass model additionally includes cost competitiveness and its interaction with spatial spillovers. Standard errors are clustered at the installation level. Wald statistics equal  $(\hat{\beta}/SE)^2$ . First-pass: AR(1)  $\hat{\alpha} = 0.8707$  (SE = 0.0203), scale = 1.005 (SE = 0.2109). Second-pass: AR(1)  $\hat{\alpha} = 0.0185$  (SE = 0.166), scale = 1.02 (SE = 9.14). Clusters: 2,647. Maximum cluster size: 53. Significance: \*\*\* $p < 0.001$ , \*\* $p < 0.01$ , \* $p < 0.05$ , . $p < 0.1$ .  $n = 111,147$ .

453 interpreted as slightly conservative with respect to spillover magnitudes relevant for green H<sub>2</sub> demand.  
 454 **Supplementary Figure 5** reports baseline green H<sub>2</sub> demand projections (including carbon pricing, but  
 455 no other policy interventions) for the cogeneration plants analogue. The projections are consistent  
 456 with those reported in the main article with only immaterial differences.

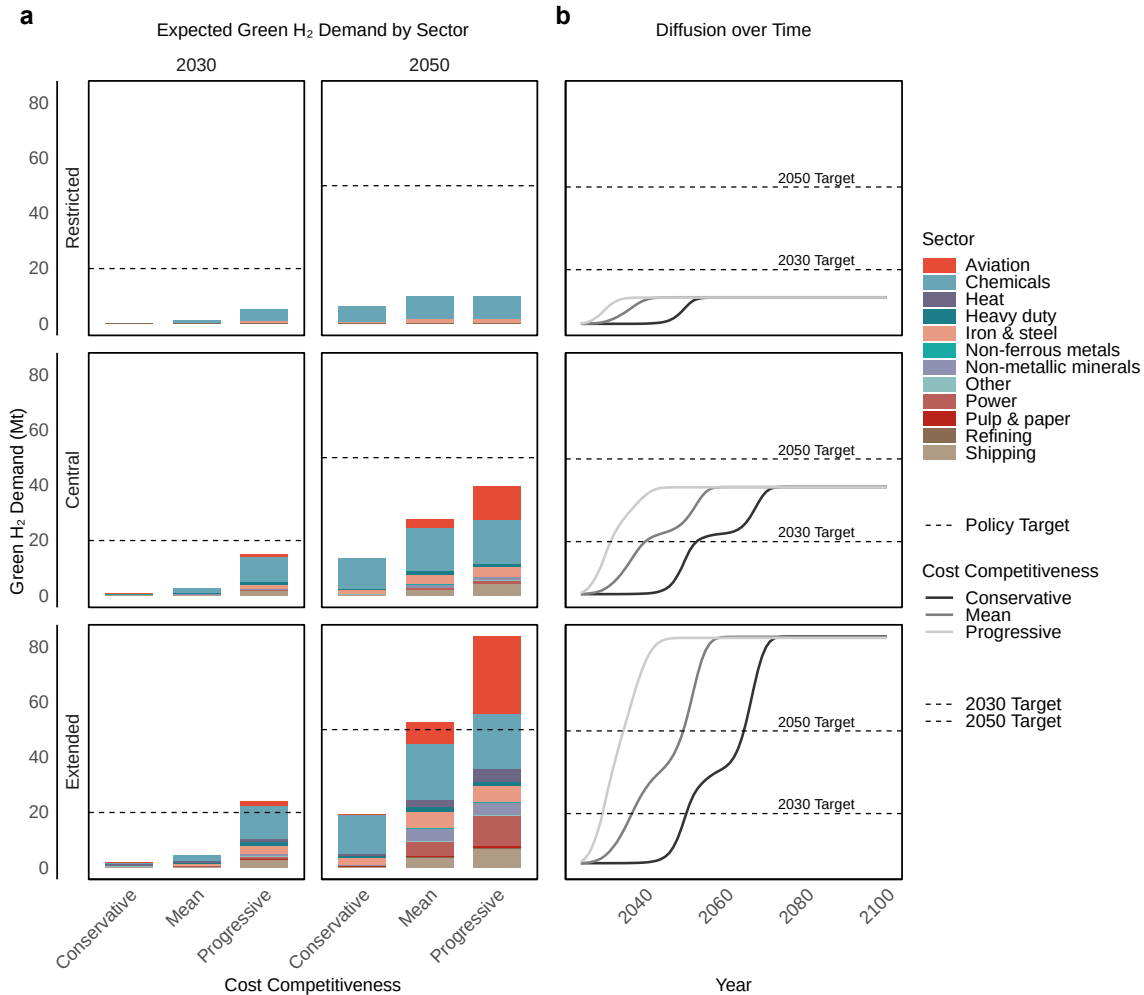

**Supplementary Figure 5** Baseline projections of expected green H<sub>2</sub> demand before policy intervention using cogeneration plants as historical analogue

**a** Expected green H<sub>2</sub> demand in 2030 and 2050 under combinations of green H<sub>2</sub> cost trajectories (conservative, mean, progressive) and saturation assumptions (restricted, central, extended), broken down by sector. Dashed lines indicate policy targets of 20 Mt green H<sub>2</sub> demand by 2030, and 50 Mt (10% of final energy demand as per the EU’s SAM GEM E3 model)<sup>71</sup> by 2050. Projections still fall short of policy targets in most cases, but show a higher rate of diffusion compared to the main model. **b** Time series of green H<sub>2</sub> diffusion between 2024 and 2100 disaggregated by saturation case. Green H<sub>2</sub> cost trajectories are shown in varying shades of grey. Diffusion curves follow the typical S-shape of technology diffusion.<sup>66</sup>

## Empirical identification with wind power plants

458 For wind power plants, results are similarly consistent (see [Supplementary Table 3](#)). Results are  
 459 structurally consistent with the natural gas power plant results: the coefficient on spatial spillovers is  
 460 even higher than in the model calibrated on natural gas power plants; the coefficients on cost compet-  
 461 itiveness (12 and the interaction term are somewhat lower, and the coefficients on the infrastructure  
 462 variables are materially unchanged.

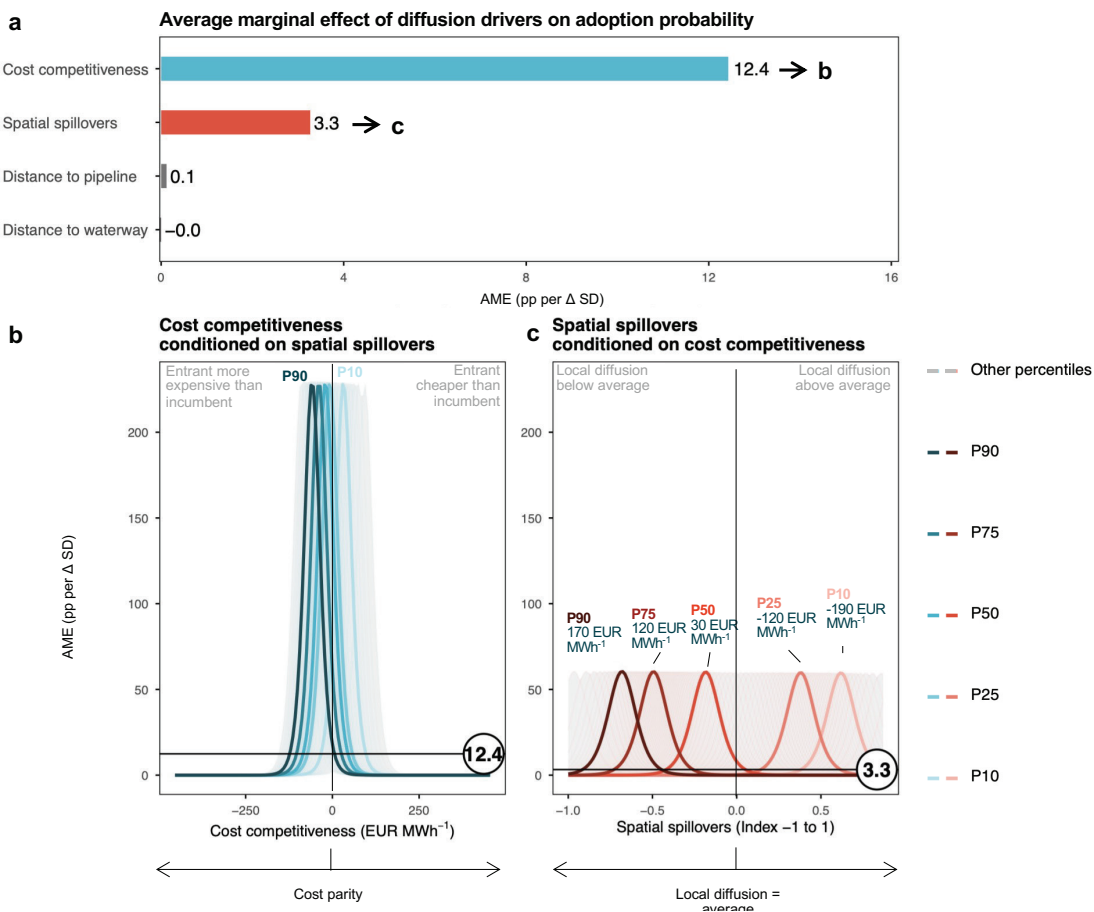

**Supplementary Figure 6 Average marginal effects of cost competitiveness and spatial spillovers on adoption using wind as historical analogue.** **a** Average marginal effect (AME) of all independent variables. Cost competitiveness and spatial spillovers are the primary drivers of diffusion, with an AME of cost competitiveness (blue bar) approximately 4-times the AME of spatial spillovers (red bar).

**b-c** AME of cost competitiveness (**b**) and spatial spillovers (**c**), conditioned on each other. Colored lines denote the AME across the predictor's range for selected percentiles of the conditioning variable. The grey ribbon indicates the overall range of AMEs across all possible values of the conditioning variable. Horizontal black lines and annotations denote the overall AME. Vertical black lines denote zero values (cost parity and local diffusion = average diffusion). AMEs are derived from the logistic regression model in [Supplementary Table 3](#) using a finite difference approximation and normalized using the variables' standard deviations.

[Supplementary Figure 6a](#) reports the average marginal effects of all diffusion drivers on green H<sub>2</sub> adoption probability. Consistent with the results from the regression, cost competitiveness and spatial spillovers are the main drivers of diffusion, with an average marginal effect of cost competitiveness of approximately 12.6 pp per SD, compared to 3.3 pp per SD for spatial spillovers. Compared to natural gas power plants, the average marginal effect of cost competitiveness is thus slightly lower (12.6 versus 14.5), the average marginal effect of spatial spillovers higher (3.3 vs 1.7).

**Supplementary Table 3** GEE logistic regression estimates of adoption probability (AR(1) correlation structure)

| Variable                                               | First pass |         |         |           | Second pass |         |          |            |
|--------------------------------------------------------|------------|---------|---------|-----------|-------------|---------|----------|------------|
|                                                        | Est.       | SE      | Wald    | <i>p</i>  | Est.        | SE      | Wald     | <i>p</i>   |
| Intercept                                              | 0.2301     | 0.0161  | 205.34  | <2e-16*** | 1.1693      | 0.0319  | 1344.07  | <2e-16***  |
| Cost competitiveness ( $C_{i,t}$ )                     | —          | —       | —       | —         | 0.0662      | 0.00054 | 15055.50 | <2e-16***  |
| Spatial spillovers ( $S_{i,t}$ )                       | 3.6256     | 0.0777  | 2179.66 | <2e-16*** | 18.1901     | 0.2349  | 5994.56  | <2e-16***  |
| Distance to waterways ( $D_i^{\text{water}}$ )         | -0.00030   | 0.00021 | 1.96    | 0.161     | -0.00038    | 0.00036 | 1.13     | 0.287      |
| Distance to pipeline corridors ( $D_i^{\text{pipe}}$ ) | 0.00011    | 0.00007 | 2.29    | 0.130     | 0.00061     | 0.00019 | 10.98    | 0.00092*** |
| Interaction: $C_{i,t} \times S_{i,t}$                  | —          | —       | —       | —         | 0.00069     | 0.00300 | 0.05     | 0.817      |

Notes: Output from two generalized estimating equation (GEE) logistic regression models with an AR(1) correlation structure. The first-pass model includes spatial spillovers and distances to waterways and pipeline corridors. The second-pass model additionally includes cost competitiveness and its interaction with spatial spillovers. Standard errors are clustered at the installation level. Wald statistics equal  $(\hat{\beta}/SE)^2$ .

First-pass: AR(1)  $\hat{\alpha} = 0.7885$  (SE = 0.00343), scale = 0.9873 (SE = 0.0154).

Second-pass: AR(1)  $\hat{\alpha} = 0.0234$  (SE = 0.0348), scale = 0.472 (SE = 0.702).

Clusters: 10,019. Maximum cluster size: 30. Significance: \*\*\* $p < 0.001$ , \*\* $p < 0.01$ , \* $p < 0.05$ ,  $p < 0.1$ .

$n = 213,788$ .

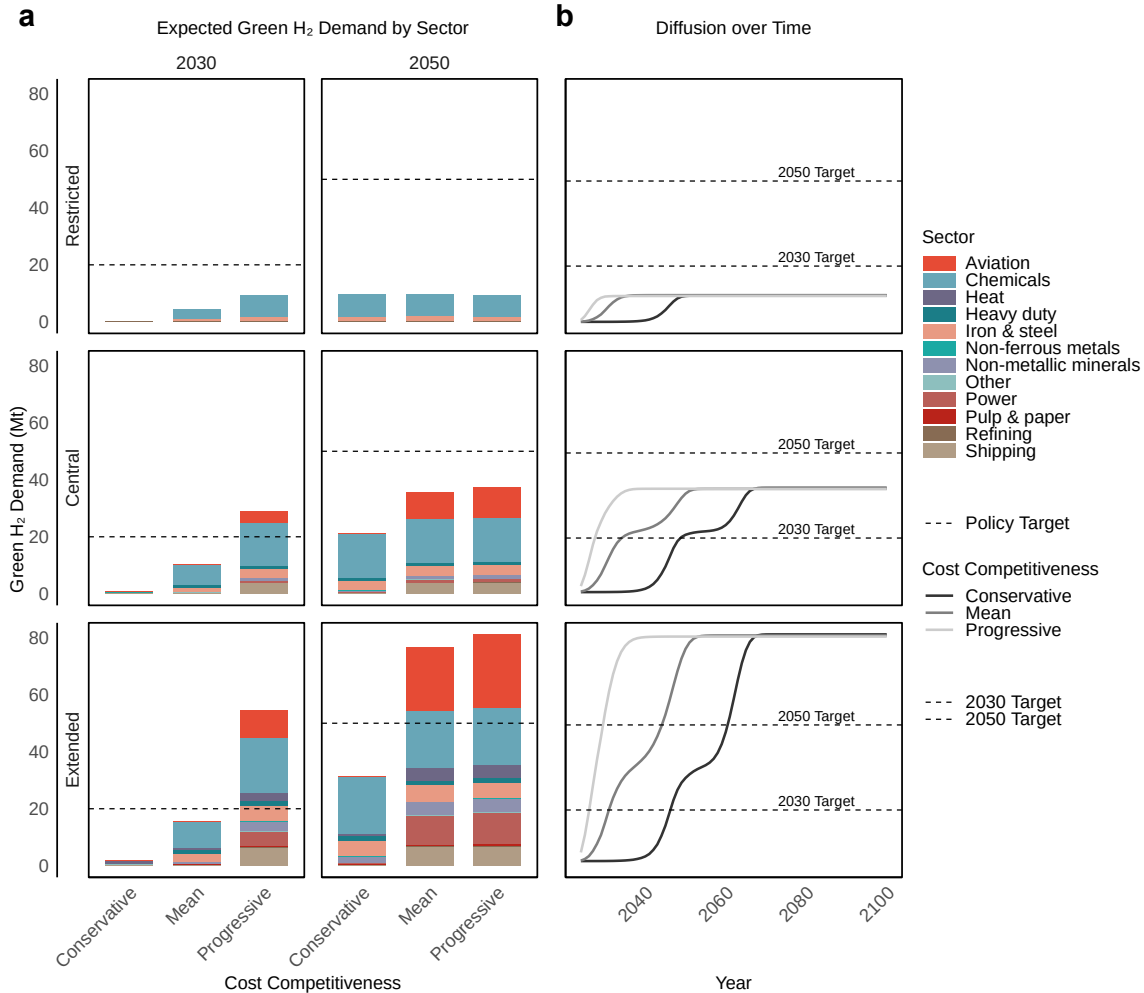

**Supplementary Figure 7** Baseline projections of expected green H<sub>2</sub> demand before policy intervention using wind as historical analogue

**a** Expected green H<sub>2</sub> demand in 2030 and 2050 under combinations of green H<sub>2</sub> cost trajectories (conservative, mean, progressive) and saturation assumptions (restricted, central, extended), broken down by sector. Dashed lines indicate policy targets of 20 Mt green H<sub>2</sub> demand by 2030, and 50 Mt (10% of final energy demand as per the EU’s SAM GEM E3 model)<sup>71</sup> by 2050. Projections still fall short of policy targets in most cases, but show a higher rate of diffusion compared to the main model. **b** Time series of green H<sub>2</sub> diffusion between 2024 and 2100 disaggregated by saturation case. Green H<sub>2</sub> cost trajectories are shown in varying shades of grey. Diffusion curves follow the typical S-shape of technology diffusion.<sup>66</sup>

469 [Supplementary Figure 6b](#) and [c](#) report the average marginal effects of cost competitiveness and  
470 spatial spillovers, conditioned on each other. The average marginal effect of cost competitiveness,  
471 conditioned on spatial spillovers, behaves similarly to the main model but peaks at lower levels  
472 of cost competitiveness. Relative to the main model’s range of approximately  $-35$  EUR MWh<sup>-1</sup> to  
473  $75$  EUR MWh<sup>-1</sup>, the peaks now begin at  $-90$  EUR MWh<sup>-1</sup> and extend to  $95$  EUR MWh<sup>-1</sup>. We interpret  
474 this as evidence that adoption of wind plants starts earlier, at lower levels of cost competitiveness.  
475 The average marginal effect of spatial spillovers, conditioned on cost competitiveness, again shows  
476 consistent behavior but with less variation in level. Spatial spillovers remain influential even at higher  
477 cost competitiveness levels (up to the 90th percentile), reinforcing their stronger role in the diffusion  
478 of wind relative to natural gas power plants.

479 We interpret this as evidence that adoption of wind plants starts earlier, at lower levels of cost  
480 competitiveness. The average marginal effect of spatial spillovers, conditioned on cost competitiveness,  
481 again shows consistent behavior but with less variation in level. Spatial spillovers remain influential  
482 even at higher cost competitiveness levels (up to the 90th percentile), reinforcing their stronger role  
483 in the diffusion of wind relative to natural gas power plants.

484 [Supplementary Figure 7](#) reports baseline green H<sub>2</sub> demand projections (including carbon pricing,  
485 but no other policy interventions) for a wind power plant analogue. The projections are consistent  
486 with those reported in the main article but show a faster rate of diffusion. For example, in the  
487 extended saturation case, the 2030 policy target is (almost) achieved in the mean cost competitiveness  
488 trajectory in addition to the progressive one. This is consistent with the notion, presented in the main  
489 article and in [Supplementary Note 3](#), that wind power plants were historically subject to substantially  
490 higher levels of policy support compared to natural gas power plants, making them less suitable for  
491 constructing an intervention-free baseline of green H<sub>2</sub> demand.

## 492 **Empirical identification with external levelized cost of electricity (LCOE)** 493 **measures**

494 We operationalize cost competitiveness using a two-step regression approach, where cost competi-  
495 tiveness is identified from the residuals of a first-pass regression of adoption on spatial spillovers and  
496 physical distance to natural gas transmission pipelines and navigable waterways. As explained in  
497 Methods, residuals-based measurement is common practice when direct measurement is challenging  
498 and is regularly applied in energy research.<sup>72</sup>

499 A residuals-based approach is valid when the residual is dominated by the latent variable of  
500 interest—in this case, cost competitiveness. The literature on energy technology diffusion suggests  
501 that cost competitiveness plays a major role in diffusion.<sup>20,27,55</sup> There is therefore a strong theoretical  
502 argument that, after partialling out spatial dependencies and distances to physical infrastructure,  
503 cost accounts for a large share of the remaining variation.

504 We use external measures of cost competitiveness to further test this assumption. In the case of  
505 natural gas power generation, cost competitiveness can be defined broadly as the spread between the  
506 LCOE of natural gas and the LCOE of alternative generation technologies, such as coal. As explained  
507 in Methods, historical time series for both natural gas and coal LCOEs are extremely limited in avail-  
508 ability and quality. To our knowledge, the most comprehensive dataset on historical LCOEs reports  
509 coal LCOEs starting in the 1920s, with several gaps, and natural gas LCOEs only from 1982.<sup>55</sup> We  
510 refrain from using these values for our main analysis for several reasons. First, LCOEs are compos-  
511 ites of different sources, which do not always fully disclose their underlying assumptions and can be  
512 internally inconsistent. Second, they are US-based, whereas our analysis is EU-focused, which can  
513 lead to significant differences, particularly due to fuel cost differences.<sup>73</sup> Third, LCOEs are aggregate  
514 measures and therefore fail to account for spatial heterogeneity in costs. Fourth, a cost competitive-  
515 ness measure based on LCOEs is necessarily pairwise, for example natural gas versus coal, which  
516 substantially simplifies actual competition dynamics in electricity markets, where different generation  
517 sources, including coal, natural gas, nuclear, hydro, wind, and solar, compete contemporaneously.  
518 Finally, availability does not cover the full natural gas power plant diffusion process: in 1982, the  
519 first year with available natural gas LCOEs, deployed capacity already amounted to 14 GW, or 8%  
520 of cumulative diffusion.

**Average marginal effect of diffusion drivers on green H2 adoption proba**

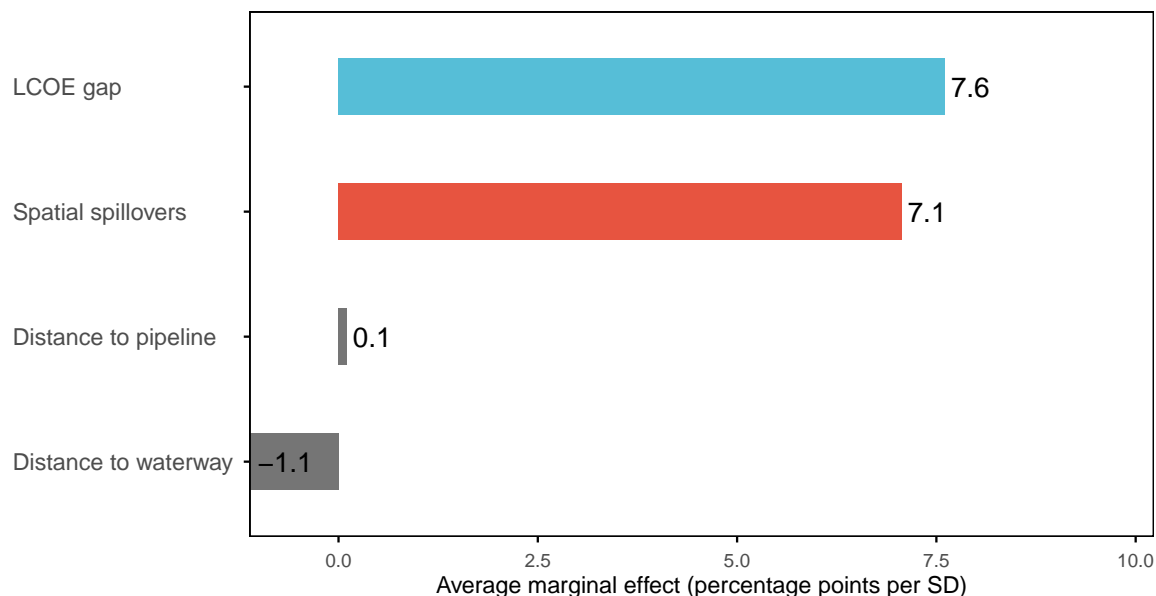

**Supplementary Figure 8 Average marginal effects of cost competitiveness and spatial spillovers on adoption using external LCOE measures.** Average marginal effect (AME) of all independent variables. Cost competitiveness and spatial spillovers are the primary drivers of diffusion, with an AME of cost competitiveness (blue bar, measured as gap between external measurements of natural gas and coal LCOEs<sup>55</sup>) slightly larger than the AME of spatial spillovers (red bar

. Effects are consistent with the main model.

521 While we caution against using these LCOEs in the main analysis, they provide a useful benchmark  
522 for assessing whether our empirical measure captures cost competitiveness dynamics. Our latent  
523 measure of cost competitiveness is reasonably strongly linked to the external LCOE time series, with  
524 a correlation coefficient of 0.7 and an  $R^2$  of 0.47. Given the limitations of the LCOE time series, this  
525 suggests a robust conceptual link.

526 As a further robustness test, we re-estimate marginal effects using the external LCOE time series  
527 rather than the latent cost competitiveness measure. Results remain robust, with both the LCOE  
528 gap and spatial spillovers being positively and statistically significantly associated with diffusion. The  
529 average marginal effect of spatial spillovers, which is central to our results and most relevant to our  
530 policy implications, increases to 7.1 percentage points [Supplementary Figure 8](#). This suggests that  
531 the spillover effects reported in the main article are conservative relative to an alternative model  
532 using external LCOE measures. The average marginal effect of cost competitiveness is lower, at 7.6  
533 percentage points, but remains the most prominent driver of diffusion.

### 534 **Statistical robustness tests**

535 To test whether our specification and implementation of the empirical model is appropriate from a  
536 statistical perspective, we assess it for potential issues related to multicollinearity and autocorrelation.  
537 The independent variables do not present problematic multicollinearity, with variance inflation factors  
538 only slightly exceeding one (see [Supplementary Table 4](#)).

539 Through the spatial spillover variable, we control for spatial autocorrelation directly in the model  
540 specification. We confirm this using a Moran plot (see [Supplementary Figure 9](#)) placing the model  
541 residuals on the x axis, and their spatial lag on the y axis. A positive slope, or global Moran I, indicates  
542 spatial autocorrelation. The distribution of the observations does not indicate spatial autocorrelation,  
543 which is consistent with the model specification.

**Supplementary Table 4** Collinearity statistics from the first and second pass of model specification.

| Term                                                   | VIF (CI)         | SE Factor | Tolerance (CI)      |
|--------------------------------------------------------|------------------|-----------|---------------------|
| <i>First pass</i>                                      |                  |           |                     |
| Spatial spillovers ( $S_{i,t}$ )                       | 1.00 (1.00–1.01) | 1.00      | 0.996 (0.986–0.999) |
| Distance to waterways ( $D_i^{\text{water}}$ )         | 1.32 (1.32–1.33) | 1.15      | 0.755 (0.750–0.760) |
| Distance to pipeline corridors ( $D_i^{\text{pipe}}$ ) | 1.32 (1.31–1.33) | 1.15      | 0.756 (0.751–0.761) |
| <i>Second pass</i>                                     |                  |           |                     |
| Cost competitiveness ( $C_{i,t}$ )                     | 1.10 (1.09–1.10) | 1.05      | 0.911 (0.905–0.916) |
| Spatial spillovers ( $S_{i,t}$ )                       | 1.25 (1.24–1.25) | 1.12      | 0.802 (0.797–0.807) |
| Distance to waterways ( $D_i^{\text{water}}$ )         | 1.21 (1.21–1.22) | 1.10      | 0.825 (0.820–0.830) |
| Distance to pipeline corridors ( $D_i^{\text{pipe}}$ ) | 1.21 (1.20–1.22) | 1.10      | 0.826 (0.821–0.831) |
| Interaction: $C_{i,t}S_{i,t}$                          | 1.15 (1.14–1.16) | 1.07      | 0.869 (0.864–0.874) |

*Note:* Variance inflation factors (VIFs) measure multicollinearity among regressors and are defined as  $VIF_j = (1 - R_j^2)^{-1}$ , where  $R_j^2$  is obtained from regressing regressor  $j$  on all other regressors. SE factors correspond to  $\sqrt{VIF}$ ; tolerance is defined as  $1/VIF$ . Confidence intervals are based on repeated resampling. All VIF values remain below conventional thresholds (e.g.  $VIF < 5$ ), indicating low multicollinearity.

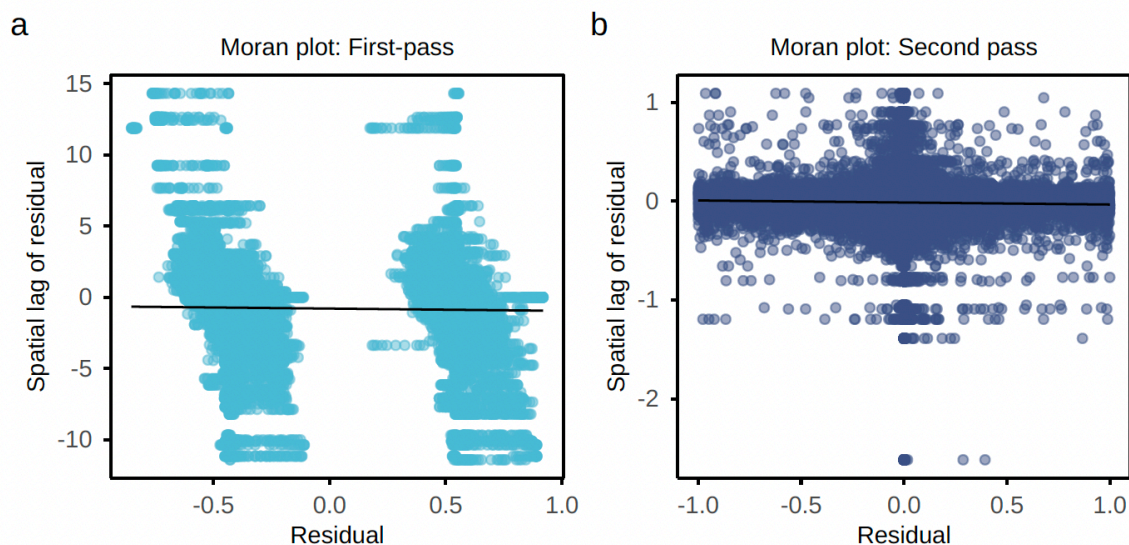

**Supplementary Figure 9** Spatial autocorrelation in the residuals of the empirical adoption model. The plot relates residuals of first and second pass of the model to their spatial lag. The slope, represented as a black line, is equivalent to Global Moran's I, a measure of spatial autocorrelation. Since the slope is close to zero, the plot suggests a lack of spatial autocorrelation.

544 In our model we use a cumulative irreversible measure of adoption as a dependent variable ( $A_{i,t}$ ).  
 545 This results, by definition, in serial autocorrelation. This is evident from an ACF plot (Supplementary  
 546 Figure 10), which shows the correlation of residuals with lagged residuals over 17 time periods (years).  
 547 For all but the last lag, the plot indicates serial autocorrelation significant at a 5% level.

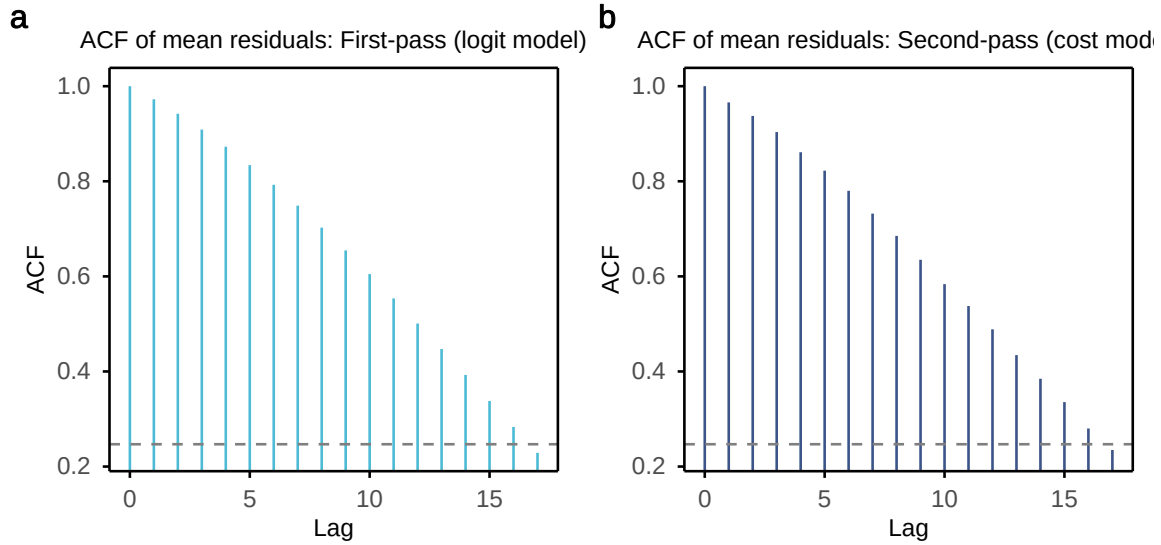

**Supplementary Figure 10 Serial autocorrelation in the residuals of the empirical adoption model** The plot shows the correlation between residuals of first and second pass of the model to their temporal lags. The dashed horizontal lines represent the 95% confidence bands for the null hypothesis of no serial correlation. For all but the last lag, the correlation exceeds this line, indicating significant autocorrelation at a 5% significance level.

548 One way to control for autocorrelation would be to include the lagged adoption term  $A_{i,t-1}$  as a  
 549 predictor. In the present set-up, we refrain from doing so because  $A_{i,t-1}$  is highly correlated with the  
 550 cost competitiveness variable, which is itself a function of  $A_{i,t}$ , leading to multicollinearity. Instead,  
 551 we estimate the logit model using Generalized Estimating Equations (GEE) rather than a Generalized  
 552 Linear Model (GLM). GEE yields consistent and unbiased coefficient estimates even in the presence  
 553 of autocorrelation.<sup>74</sup> We specify a one-lag auto-regressive correlation structure within installations.  
 554 Importantly, in GEE the choice of correlation structure affects efficiency but not consistency – esti-  
 555 mates remain valid even if the structure is mis-specified. Reported  $p$ -values are based on the Wald  
 556  $Z$ -statistic and robust (sandwich) standard errors, which are also robust to autocorrelation within  
 557 clusters.

## 558 2 Supplementary Notes to Spatial Spillover Potentials for 559 informing H<sub>2</sub> Policymaking

### 560 2.1 SN5: Projection of future cost competitiveness

561 For the purpose of this paper, cost competitiveness is defined as the difference between the cost  
 562 of green H<sub>2</sub> (or its derivatives, such as e-methanol or e-kerosene) and the cost of the incumbent  
 563 fossil energy carrier used in each sector. Cost estimates up to 2050 are taken from Odenweller and  
 564 Ueckerdt,<sup>42</sup> and subsequently extended to 2100, which aligns with the time horizon of the IPCC 1.5 °C  
 565 target. Extending the projections beyond 2050 is necessary, as previous research indicates that neither  
 566 technology adoption nor cost structures are expected to have reached saturation by mid-century.<sup>52</sup>

567 Green H<sub>2</sub> costs are extrapolated beyond 2050 using a Wright’s Law formulation anchored at their  
 568 estimated 2050 values. The rate of cost decline implied by this formulation is estimated from observed  
 569 values between 2023 and 2050 using nonlinear least-squares methods, implemented via R’s *minpack.lm*  
 570 package. This procedure yields deterministic cost trajectories for each green H<sub>2</sub> cost scenario. In line  
 571 with the objective of providing internally consistent scenario pathways to the simulation, we do not  
 572 introduce stochastic uncertainty into the learning rate.

573 Fossil-cost trajectories depend on the assumed carbon-price pathway (Supplementary Note 7).  
 574 Under a flat carbon-price setting, we follow Way et al in estimating a first-order autoregressive model,  
 575 in which costs in each year depend on the preceding year and a random disturbance.<sup>55</sup> The autore-  
 576 gressive parameter is obtained by maximum likelihood under stationarity constraints. For the default  
 577 (escalating) carbon price scenario, fossil costs are projected using autoregressive integrated moving-  
 578 average (ARIMA) models, to account for the non-stationarity introduced by changing carbon prices.  
 579 The appropriate model specification, including the autoregressive order, the degree of differencing,  
 580 and the moving-average order, is selected using R’s *auto.arima* package, which minimizes the Akaike  
 581 Information Criterion over the available cost projections (2023-2050).

582 The extended green H<sub>2</sub> and fossil cost trajectories provide sector-specific cost levels and cost  
 583 differentials for the period 2024–2100. These values enter directly into the simulation framework and  
 584 serve as dynamic cost inputs to the adoption decision function in the simulation.

585 We broadly follow Odenweller and Ueckerdt<sup>42</sup> in the choice of technology pairings (see Supple-  
 586 mentary Table 5), while adding e-methanol – diesel for shipping, and e-methane – natural gas for  
 587 power and heat. For other industries we assume that the relevant competition occurs between green  
 588 H<sub>2</sub> and natural gas.

**Supplementary Table 5** Technology mapping by sector.

| Sector                | Green H <sub>2</sub> and Derivatives | Fossil Technology   |
|-----------------------|--------------------------------------|---------------------|
| Aviation              | E-Kerosene                           | Kerosene            |
| Chemicals             | Green H <sub>2</sub>                 | Grey H <sub>2</sub> |
| Heat                  | E-Methane                            | Natural Gas         |
| Heavy-duty trucks     | Green H <sub>2</sub>                 | Diesel              |
| Iron & steel          | Green H <sub>2</sub>                 | Natural Gas         |
| Non-ferrous metals    | Green H <sub>2</sub>                 | Natural Gas         |
| Non-metallic minerals | Green H <sub>2</sub>                 | Natural Gas         |
| Other                 | Green H <sub>2</sub>                 | Natural Gas         |
| Power                 | E-Methane                            | Natural Gas         |
| Pulp & paper          | Green H <sub>2</sub>                 | Natural Gas         |
| Refining              | Green H <sub>2</sub>                 | Grey H <sub>2</sub> |
| Shipping              | E-Methanol                           | Diesel              |

589 The development of future cost, in particular for green H<sub>2</sub> and derivatives, is subject to substan-  
 590 tial uncertainty. We therefore use a range of H<sub>2</sub> cost estimates that include the mean, progressive  
 591 and conservative H<sub>2</sub> cost scenarios presented by Odenweller and Ueckerdt.<sup>42</sup> H<sub>2</sub> cost estimates are  
 592 reported in Supplementary Figure 11. Green H<sub>2</sub> costs for iron & steel are adjusted for differences in  
 593 technical efficiencies between natural gas and H<sub>2</sub> (20 %).<sup>42</sup>

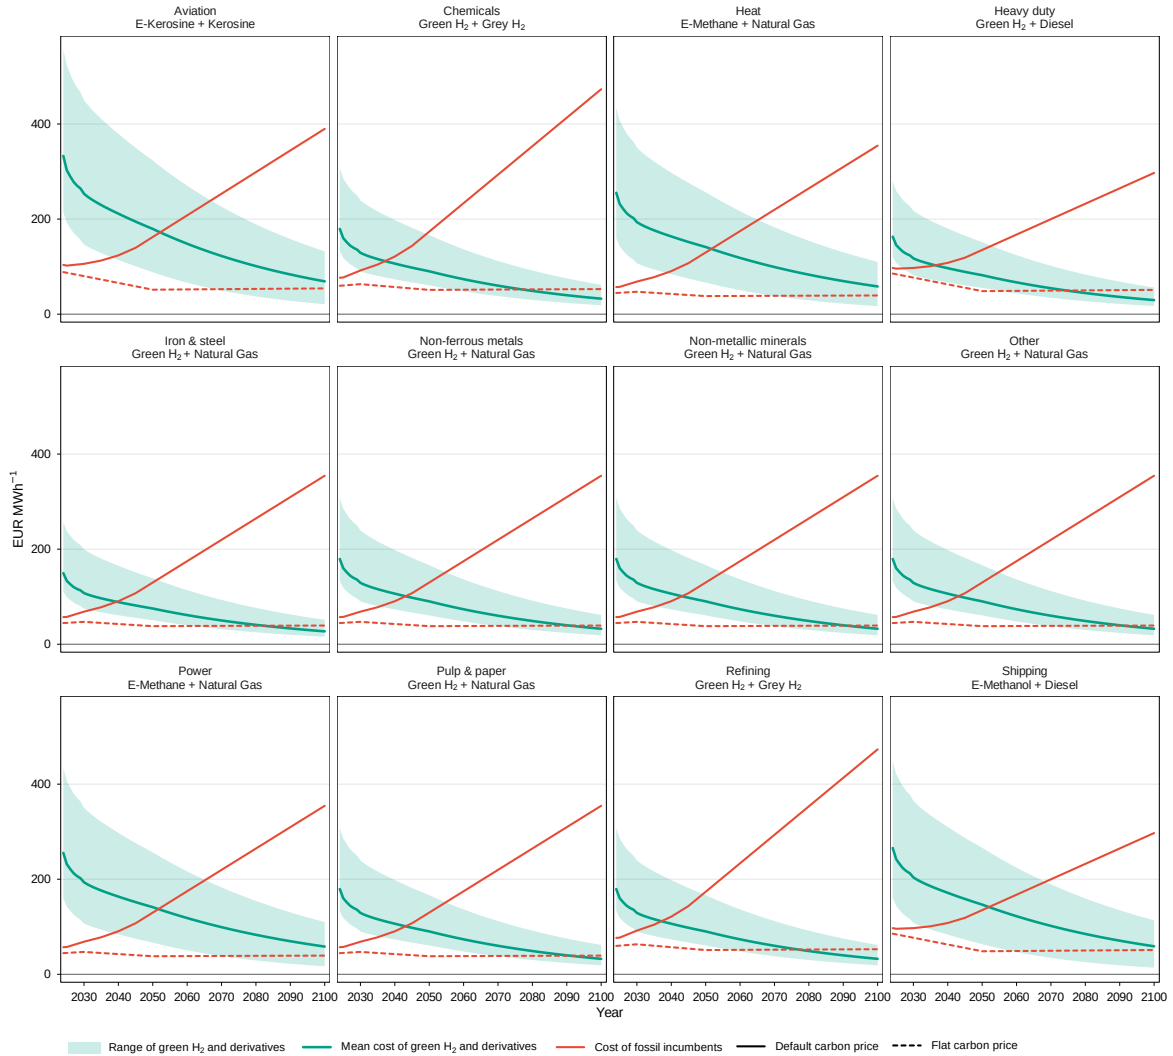

**Supplementary Figure 11 Cost trajectories for green H<sub>2</sub>, derivatives and fossil incumbents by sector.** Projections up to 2050 are based on Odenweller and Ueckerdt<sup>42</sup> and extended to 2100 using an auto-regressive specification for fossil cost trajectories, and a Wright’s law specification for the cost trajectories of green H<sub>2</sub> and its derivatives. For green H<sub>2</sub> costs, the solid green line illustrates the mean cost scenario; the green ribbon illustrates the potential range of green costs between progressive and conservative cost scenario. For fossil costs, the solid red line shows the cost trajectory under default (escalating) carbon prices;<sup>75</sup> the dashed line the cost trajectory under flat carbon price assumptions.

594 Note that our definition of cost competitiveness is necessarily simplifying. We rely on sector-level  
 595 technology pairings that reflect the most commonly employed incumbent fossil energy source. Yet, we  
 596 acknowledge that within each sector, incumbent fossil energy sources can to a certain degree differ,  
 597 based on production process and plant configuration. For instance, in the iron & steel sector, the raw  
 598 material for downstream steel processing can be produced either through a direct reduction route  
 599 (using natural gas) or through a blast furnace route (using coke).<sup>76</sup> Similarly, coal rather than natural  
 600 gas is often used in the smelting and roasting of non-ferrous metals like copper, zinc or lead, or for the  
 601 production of rotary kilns in the cement value chain.<sup>77</sup> As the purpose of this paper is to assess the  
 602 role of geography and spatial spillovers in the diffusion process rather than making exact, plant-level  
 603 predictions of cost competitiveness and adoption, we deliberately abstract from these granularities.

604 Similarly, we choose to define cost competitiveness as cost competitiveness versus fossil incum-  
 605 bents, and reflect alternative decarbonization technologies like direct electrification (e.g., using scrap

606 electric arc furnaces for steel production, heat pumps for heating, or batteries for heavy-duty trans-  
 607 port) through sectoral green H<sub>2</sub> saturation rates. We believe that given the focus and emphasis of  
 608 this paper this is an adequate approach, given the elevated uncertainty on the cost trajectories of  
 609 these alternative technologies, and the heterogeneity of these costs across sub-sectors and installa-  
 610 tions. Further details on the rationale of this modeling choice and the derivation of saturation rates  
 611 is provided in [Supplementary Note 6](#)

## 612 2.2 SN6: Competition for alternative decarbonization technologies and 613 saturation rates

614 Green H<sub>2</sub> competes not only with fossil incumbents such as natural gas, diesel, or kerosene, but also  
 615 with alternative decarbonization technologies. These include direct electrification, carbon capture,  
 616 storage and utilization (CCUS), and biomass-based solutions, whose applicability varies across sectors  
 617 and processes. In some applications, these alternatives offer technological advantages, including higher  
 618 technical efficiency or lower cost.

619 Conceptually, there are two ways to reflect this competition in our model. The first involves con-  
 620 structing a cost competitiveness measure that integrates cost estimates for alternative decarbonization  
 621 technologies into a single metric. The second involves introducing sector-specific saturation rates that  
 622 cap the diffusion of green H<sub>2</sub>. In the present setting, the first approach is likely to yield misleading  
 623 results (as described in the following), making saturation rates the more appropriate representation.

624 Reflecting cost competitiveness requires deriving the cost projections for a broad range of decar-  
 625 bonization technologies. Based on capital and operating cost inputs from the Danish Energy Agency,<sup>78</sup>  
 626 and on the electricity and carbon price assumptions underlying the construction of green H<sub>2</sub> cost pro-  
 627 jections ([Supplementary Note 5](#)), we compute levelized cost estimates for a set of direct electrification,  
 628 CCUS, and biomass technologies relevant to the sectors examined in this analysis (see [Supplementary](#)  
 629 [Figure 12](#)). Although these projections remain subject to considerable uncertainty, they allow us to  
 630 approximate plausible cost trajectories and relative competitiveness over time.

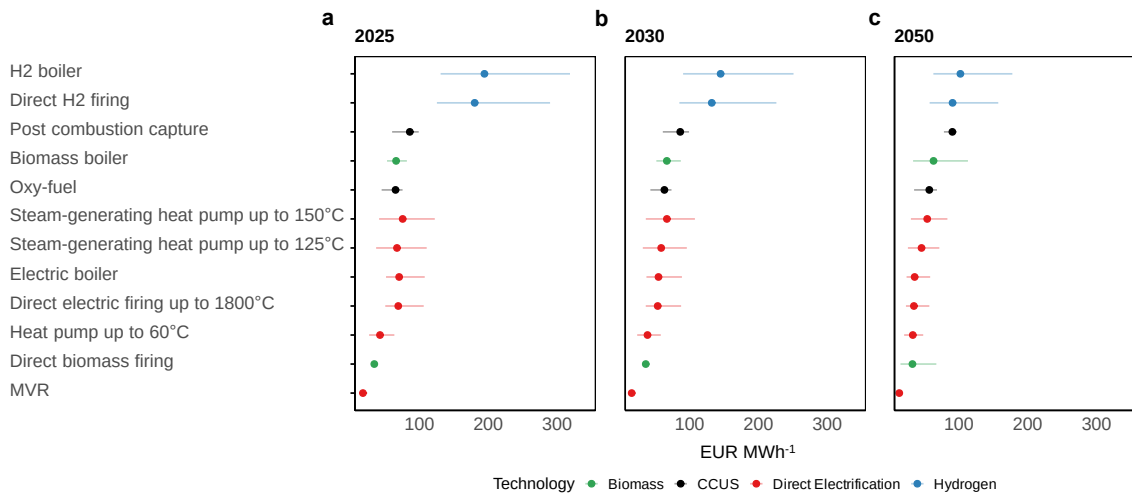

**Supplementary Figure 12 Levelized cost of direct electrification, CCUS and biomass technologies.** Levelized cost estimates include energy costs as well as levelized capital and operating expenditures based on inputs from the Danish National Energy Agency.<sup>78</sup> Electricity, natural gas and carbon price assumptions are aligned with those used for the green H<sub>2</sub> cost projections in our analysis. The upper bound of natural gas prices is fixed to 6-month TTF natural gas futures as of March 2026, representing constrained natural gas markets. To enable comparability, we construct green H<sub>2</sub> costs by combining H<sub>2</sub> production costs with levelized capital and operating expenditures for natural gas firing, as the Danish National Agency does not provide dedicated assumptions for H<sub>2</sub> firing in industrial contexts. While direct electrification, CCUS and biomass solutions appear to outperform green H<sub>2</sub> in some cases, both costs and applicability vary substantially across industries and production processes. Note that for CCUS pathways, transport and storage costs are not included, so in reality these costs can be expected to be somewhat higher than suggested.

631 These estimates could, in principle, be incorporated directly into the model’s cost competitiveness  
632 variable, thereby extending the framework from a two-way comparison between green H<sub>2</sub> and a  
633 fossil incumbent to a multi-way comparison that includes green H<sub>2</sub>, the fossil incumbent, direct  
634 electrification, CCUS and biomass. However, this approach is problematic for three reasons.

635 First, we define cost competitiveness at the sector level and do not distinguish between individual  
636 activities or processes within sectors. While this simplification is defensible when comparing two  
637 energy carriers, namely green H<sub>2</sub> and fossil incumbents, it becomes problematic when extending the  
638 comparison to heterogeneous decarbonization technologies. Many alternatives, such as mechanical  
639 vapor recompression in pulp & paper, apply only to specific production steps or configurations.<sup>78</sup>  
640 They may appear more competitive than green H<sub>2</sub>, yet they are not directly comparable because they  
641 often address different parts of the value chain.

642 Second, alternative technologies exhibit fundamentally different cost structures. Green H<sub>2</sub> can, in  
643 some cases, substitute for natural gas with limited additional capital expenditure. By contrast, direct  
644 electrification technologies such as steam heat pumps for process heat up to 150°C, direct electric firing  
645 for higher temperatures, or CCUS solutions typically require substantial upfront capital investment  
646 to modify production facilities, even if recurring energy and operating costs are lower. A comparison  
647 solely on energy costs would therefore be biased.<sup>78</sup> To reflect this, the cost projections shown in  
648 [Supplementary Figure 12](#) include levelized capital and operating costs in addition to energy costs (the  
649 calculations are available on the paper’s Github repository). These are based on generic applications  
650 and are thus highly stylized, which makes them useful for qualitative comparisons but unsuitable  
651 as model inputs. A comprehensive assessment of levelized capital and operating expenditures is not  
652 feasible in the present context, given the heterogeneity of production processes and differences in  
653 value chain coverage across technologies, even within a single sector.

654 Third, cost projections for direct electrification, CCUS and biomass, like those for green H<sub>2</sub>,  
655 remain highly uncertain. Collapsing multiple technologies into a single cost competitiveness metric  
656 complicates the representation of this uncertainty. Even if we specified cost ranges for each technology,  
657 we would also need to define their correlation structure. For example, declining renewable electricity  
658 costs would simultaneously improve the competitiveness of green H<sub>2</sub> and direct electrification.

659 In light of these considerations, we represent competition between green H<sub>2</sub>, direct electrification,  
660 and CCUS through sector-level saturation rates rather than a single multi-way cost competitiveness  
661 metric. This approach allows us to specify broad saturation ranges across three scenarios (restricted,  
662 central, and extended), thereby capturing uncertainty in technical applicability and cost develop-  
663 ment separately from competition between green H<sub>2</sub> and fossil incumbents. Operationally, we define  
664 saturation relative to the sector’s relevant energy or feedstock base as specified in each sector  
665 subsection.

666 In defining saturation rates, we proceed as follows:

- 667 1. **Process assessment:** For each sector, we first assess the production process and identify which  
668 energy inputs are technically substitutable with green H<sub>2</sub>. In this step, we exclude process compo-  
669 nents that are already decarbonized, for example through biomass, or fully electrified. For the  
670 transport and heating sectors, which do not feature a discrete production process, we omit this  
671 step.
- 672 2. **Assessment of decarbonization options:** We then identify the set of alternative decarboniza-  
673 tion technologies that compete with green H<sub>2</sub>. Across sectors, we distinguish four broad pathways  
674 for replacing fossil feedstocks, fuels and process heat: direct electrification, including direct elec-  
675 tric firing, electric boilers and batteries; green H<sub>2</sub> and its derivatives, such as e-kerosene or green  
676 methanol; CCUS, including blue H<sub>2</sub> produced from natural gas via steam methane reforming with  
677 CCUS; and biomass-based solutions, such as biofuels, biomass boilers and biomass gasification.
- 678 3. **Derivation of saturation rates:** We assess the relative competitiveness of green H<sub>2</sub> within  
679 this technology portfolio and derive sector-specific saturation rates for the restricted, central and  
680 extended scenarios. Where possible, we anchor these rates in EU policy targets or projections  
681 from institutions such as the International Energy Agency (IEA) or BNEF. To reflect substantial  
682 uncertainty, we deliberately select saturation rates that span a wide range of plausible outcomes,

683 thereby covering a broad solution space that captures most competitive constellations between  
684 green H<sub>2</sub>, direct electrification and CCUS.

685 Although saturation rates are defined at the sectoral level, the scenarios share a common  
686 underlying rationale, which we summarize below:

- 687 • **Restricted case:** Direct electrification technologies are technologically mature across most  
688 applications. Low- and medium-temperature process heat is almost fully decarbonized through  
689 electrification and partially electrified even in selected high-temperature processes, such as  
690 non-metallic minerals or iron & steel. Biomass supply remains unconstrained, and regulatory  
691 treatment of indirect land-use change emissions<sup>79</sup> and carbon debt<sup>80</sup> is not tightened further.  
692 CCUS technologies mature substantially, CO<sub>2</sub> removal becomes more effective, and transport and  
693 storage infrastructure is deployed at scale. Methane emissions remain unpriced. In this setting,  
694 biomass and CCUS outcompete green H<sub>2</sub> in most applications, except for selected core uses in  
695 iron, steel and chemicals.
- 696 • **Central case:** Direct electrification is widely deployed for low- and medium-temperature process  
697 heat but remains technologically constrained in high-temperature applications. Supply chain bot-  
698 tlenecks and stricter scrutiny of life-cycle emissions limit biomass use to core applications, notably  
699 aviation, pulp and cement. CCUS technologies improve, but their competitiveness is reduced by  
700 pricing residual emissions and more limited CO<sub>2</sub> infrastructure. At the same time, declining electro-  
701 lysis costs improve the relative position of green H<sub>2</sub>. As a result, green H<sub>2</sub> is widely adopted as  
702 a feedstock and competes on roughly equal footing with CCUS, biomass and, where technically  
703 feasible, direct electrification for high-temperature process heat.
- 704 • **Extended case:** Direct electrification remains broadly deployed for low- and medium-  
705 temperature heat but does not achieve at-scale deployment in more demanding high-temperature  
706 processes. Biomass availability becomes severely constrained, preventing expansion beyond exist-  
707 ing applications in pulp and cement as well as limited aviation use. CCUS fails to achieve  
708 substantial improvements in technological maturity and carbon removal effectiveness. Methane  
709 emissions are priced, further eroding the competitiveness of fossil-based CCUS pathways. CO<sub>2</sub>  
710 infrastructure does not materialize at scale. Under these conditions of weakened competition,  
711 green H<sub>2</sub> attains a dominant position in the provision of low-carbon feedstocks, high-temperature  
712 process heat and transport fuels.

713 It is important to note that the saturation rates are designed to reflect the competition between  
714 green H<sub>2</sub> and alternative decarbonization technologies for a given level of industrial activity. We  
715 account for expected changes in industrial activity – for example, a decline in refining due to the phase-  
716 out of fossil transport fuels, or a reduction in chemicals production resulting from higher imports  
717 – by adjusting sectoral activity levels using EU-27 energy balance projections from the European  
718 Commission’s Global Energy and Climate Outlook (see Methods). This outlook builds on the SAM  
719 GEM E3 general equilibrium model, which the European Commission employs to construct baseline  
720 scenarios for policy impact assessments, including those underpinning the EU Fit for 55 package.<sup>71</sup>

721 Finally, we emphasize that the primary purpose of the saturation rates is to generate a trans-  
722 parent projection of green H<sub>2</sub> demand that serves as an input for subsequent policy evaluation.  
723 Although these rates are relevant, particularly when benchmarking against policy targets, they  
724 remain secondary to the central contribution of the paper, which is to demonstrate the importance  
725 of spatially-informed demand-side policies. A detailed structural analysis of technology competition,  
726 and of how spatial patterns shape this competition, constitutes a promising avenue for future research  
727 but lies beyond the scope of the present study.

## 728 Aviation

729 Decarbonizing the aviation sector is structurally challenging because aircraft exhibit long technical  
730 lifetimes and slow fleet turnover,<sup>81</sup> while aviation fuels require exceptionally high volumetric energy

731 density. Conventional jet fuel provides approximately 23 MJ/l,<sup>82</sup> which constrains the feasibility of  
732 alternative energy carriers.

733 The principal low-carbon options include:<sup>81</sup>

- 734 • Direct electrification via batteries
- 735 • E-fuels (e.g., e-kerosene) or cryogenic fuels synthesized from green H<sub>2</sub>
- 736 • E-fuels (e.g., e-kerosene) or cryogenic fuels synthesized from blue H<sub>2</sub>
- 737 • Biofuels

738 Direct electrification in aviation is more constrained than in ground transport. Despite higher  
739 drivetrain efficiencies and expected improvements in battery technology, the gravimetric energy den-  
740 sity of batteries remains insufficient for medium- and long-haul aviation. The battery mass required  
741 to provide an energy-equivalent amount of drop-in fuel is approximately 28 times higher.<sup>82,83</sup> This  
742 weight penalty renders large-scale battery-electric aviation infeasible beyond short-range applications.

743 Drop-in e-fuels such as e-kerosene are produced via reverse water-gas shift and Fischer-Tropsch  
744 synthesis using H<sub>2</sub> and captured or biogenic CO<sub>2</sub>. These fuels are compatible with existing aircraft  
745 and refueling infrastructure, implying that a substitution of conventional jet fuel by 2050 is technically  
746 feasible without premature asset scrapping.<sup>81</sup> However, as in other end uses of green H<sub>2</sub>, large-  
747 scale deployment requires a substantial expansion of renewable electricity generation and electrolysis  
748 capacity.<sup>84</sup> Cryogenic fuels such as liquid H<sub>2</sub> eliminate carbon at the point of use but face structural  
749 constraints related to volumetric energy density and storage requirements. Liquid H<sub>2</sub> has a lower  
750 volumetric energy density than drop-in fuels and requires cryogenic storage systems, introducing  
751 safety and engineering challenges associated with volatility and flammability.<sup>83</sup>

752 For both drop-in fuels and cryogenic fuels, green H<sub>2</sub> can be replaced with blue H<sub>2</sub> that is generated  
753 from natural gas using CCUS. The competitiveness of this CCUS pathway depends strongly on the  
754 relative pricing of natural gas, the effectiveness of carbon removal and the pricing of residual carbon  
755 and methane emissions.<sup>43</sup>

756 At present, most commercially available sustainable aviation fuels are bio-based and produced  
757 through hydrotreating oils, fats, and residues.<sup>83</sup> While lifecycle emissions are lower than for conven-  
758 tional jet fuel, residual carbon intensities remain significant and vary widely by feedstock. Biofuels  
759 derived from waste oils exhibit lifecycle emissions of approximately 14–23 g CO<sub>2</sub>/MJ, whereas fuels  
760 produced from virgin oils range between 65–99 g CO<sub>2</sub>/MJ. Although improved agricultural practices  
761 and biogenic carbon sequestration in soils could reduce these emissions, such measures primarily mit-  
762 igate rather than eliminate residual emissions and add additional cost layers.<sup>83</sup> In the short term,  
763 biofuels can contribute to emission reductions given their technical maturity and compatibility with  
764 existing assets. In the long term, however, constrained sustainable biomass availability is likely to  
765 limit production volumes and increase marginal costs.<sup>81</sup>

766 The European Union’s ReFuelEU Aviation regulation establishes binding targets for sustainable  
767 aviation fuel deployment, requiring a 70% share of sustainable aviation fuels overall and a 35% share  
768 of e-fuels by 2050.<sup>8</sup> These targets reflect both climate neutrality objectives and expected constraints  
769 on biomass availability. The 35% target is also consistent with the IEA’s net zero projections for  
770 2050.<sup>85</sup>

771 [Supplementary Table 6](#) reports the saturation rates and assumptions based on this analysis  
772 (assuming e-kerosene rather than liquid H<sub>2</sub> is the baseline carrier for aviation fuels).

## 773 Chemicals

774 The Chemicals sector encompasses a heterogeneous portfolio of products and processes, including  
775 nitrogen-based chemicals (such as ammonia, 35% of estimated energy consumption in 2050 as recorded

**Supplementary Table 6** Saturation assumptions for green H<sub>2</sub> in aviation

| Saturation scenario | Saturation rate | Rationale                                                                                                                                                                                      |
|---------------------|-----------------|------------------------------------------------------------------------------------------------------------------------------------------------------------------------------------------------|
| Restricted          | 0%              | Biofuels remain persistently cheaper than e-fuels in the long term; sustainable biomass supply is sufficient, and residual lifecycle emissions are mitigated (e.g., via carbon sequestration). |
| Central             | 35%             | The EU 2050 target of 35% e-fuel penetration is achieved but not exceeded in the long term.                                                                                                    |
| Extended            | 80%             | E-fuels exceed the EU 2050 target and largely displace biofuels in the long term as biomass constraints and residual emissions reduce biofuel competitiveness.                                 |

Note: Saturation values rounded to 5% increments.

776 in our database), industrial H<sub>2</sub> and synthetic gas (8%), organic chemicals and polymers (46%), and  
 777 other inorganic chemicals (12%).

778 Across these subsectors, emissions result from high-temperature process heat and process emis-  
 779 sions. The relative importance of these elements differs across subsectors, which in turn shapes the  
 780 relative role of green H<sub>2</sub> in deep decarbonization pathways.

### 781 Nitrogen-based chemicals

782 Nitrogen-based chemicals comprise primarily ammonia, which is used as an input for nitric acid  
 783 and other downstream products within the fertilizer value chain.

784 The conventional nitrogen chemicals value chain involves several stages. First, H<sub>2</sub> is produced  
 785 from fossil feedstocks via steam reforming. The resulting H<sub>2</sub> is then combined with nitrogen in the  
 786 Haber-Bosch process to synthesize ammonia. This synthesis step is exothermic; electricity input for  
 787 nitrogen separation and the Haber-Bosch process is negligible.<sup>86</sup> In subsequent steps, ammonia can  
 788 be reacted with CO<sub>2</sub> to produce urea, with phosphoric acid to produce phosphate-based fertilizers,  
 789 or oxidized to nitric acid, which serves as an input for fertilizers and explosives. Energy use and  
 790 emissions are concentrated almost entirely in the steam reforming step that generates H<sub>2</sub>, which in  
 791 the conventional production process relies predominantly on fossil feedstocks.<sup>86</sup> In our analysis of  
 792 decarbonization options, we therefore focus on this value chain step.

793 Decarbonization options include:<sup>86</sup>

- 794 • Electrolytic H<sub>2</sub> (green H<sub>2</sub>)
- 795 • CCUS applied to steam reforming (blue H<sub>2</sub>)
- 796 • H<sub>2</sub> produced via dry biomass gasification

797 Regarding competition between green and blue H<sub>2</sub> pathways, global project announcements for  
 798 H<sub>2</sub> projects with ammonia output are heavily skewed towards green H<sub>2</sub> (87%).<sup>2</sup> Given the very large  
 799 biomass requirements, dry biomass gasification is likely to remain a marginal option.<sup>86</sup>

800 In setting saturation rates, we assume the following split between green and blue H<sub>2</sub> pathways  
 801 for ammonia synthesis: in the central case, green H<sub>2</sub> is assumed to supply approximately 80% of the  
 802 H<sub>2</sub> feedstock, consistent with the IEA's Net Zero scenario.<sup>85</sup> In the extended case, green H<sub>2</sub> fully  
 803 outcompetes blue H<sub>2</sub>, reflecting limited carbon removal effectiveness and stringent pricing of residual  
 804 CO<sub>2</sub> and methane emissions.<sup>43</sup> In the restricted case, we assume an equal split between green and  
 805 blue H<sub>2</sub>.

### 806 H<sub>2</sub> and synthetic gas

807 As H<sub>2</sub> is the key precursor in the production of ammonia, we assume the relative competitiveness  
 808 of decarbonization options to match that of ammonia and apply the same saturation rates.

### 809 Organic chemicals and polymers

810 Organic chemicals and polymers comprise products such as methanol, olefins, and aromatics, which  
811 serve as key precursors for plastic resins. Production pathways vary by product. Methanol, a precursor  
812 to formaldehyde and various plastics, is synthesized from synthesis gas, which is typically produced  
813 via steam reforming of natural gas or coal gasification. Olefins, such as ethylene and propylene, are  
814 generated through steam cracking of naphtha or ethane, both of which are outputs of the refining  
815 sector (see Refining). Aromatics, including benzene, toluene, and xylene, are generally produced  
816 via catalytic reforming of naphtha. These platform chemicals function as intermediates that are  
817 subsequently converted into a broad range of polymers and downstream products.<sup>87,88</sup>

818 Decarbonizing organic chemicals and polymers is particularly challenging because carbon is  
819 required as a material feedstock. Deep decarbonization therefore entails substantial process redesign,  
820 replacing not only fossil-based process heat but also fossil feedstocks. We first assess methanol, fol-  
821 lowed by olefins and aromatics, as green H<sub>2</sub>-based methanol plays a central role in decarbonization  
822 pathways for the latter.

### 823 *Methanol*

824 In the conventional production process, methanol is produced through the hydrogenation of CO  
825 and CO<sub>2</sub> contained in syngas, which is derived from natural gas or coal using steam reforming.<sup>89</sup>  
826 Energy input and emissions are concentrated in the steam reforming step.<sup>89</sup> Methanol synthesis itself  
827 is exothermic but requires process temperatures of 200–300°C to maintain reaction temperatures  
828 and pressures. Process heat is typically generated from the feedstock.<sup>90</sup> Decarbonization options  
829 include:<sup>86,87</sup>

- 830 • Synthetic carbon pathways using green H<sub>2</sub> and captured or biogenic CO<sub>2</sub> (yielding “green  
831 methanol”)
- 832 • Synthetic carbon pathways using blue H<sub>2</sub> and captured or biogenic CO<sub>2</sub> (yielding “blue  
833 methanol”)
- 834 • CCUS in steam reforming (yielding “blue methanol”)
- 835 • Dry biomass gasification

836 The competition between green H<sub>2</sub> and blue H<sub>2</sub> and CCUS pathways is highly dependent on the  
837 effectiveness of carbon removal, the presence of methane leakages, and the pricing of fossil inputs,  
838 carbon, and methane emissions.<sup>43</sup> Due to the extremely high amount of biomass that would be  
839 required, dry biomass gasification is likely to play a subordinate role.<sup>86</sup>

840 In setting saturation rates, we assume the following splits between green and blue H<sub>2</sub> in methanol  
841 synthesis. In the central case, green H<sub>2</sub> is assumed to supply approximately 80% of the H<sub>2</sub> feed-  
842 stock used in methanol production, consistent with the predominance of electrolytic H<sub>2</sub> in the  
843 IEA’s Net Zero scenario.<sup>85</sup> In the extended case, green H<sub>2</sub> is assumed to fully displace blue H<sub>2</sub>.  
844 In the restricted case, we assume an equal split between green and blue H<sub>2</sub>. Across all scenarios,  
845 process heat in methanol production is assumed to continue to be generated primarily from the feed-  
846 stock. Consequently, the upstream H<sub>2</sub> supply mix directly determines the overall energy composition  
847 of decarbonized methanol synthesis. This structurally mirrors our assumptions for nitrogen-based  
848 chemicals.

### 849 *Olefins and aromatics*

850 For olefins and aromatics, it is important to distinguish between the decarbonization of feedstocks  
851 and the decarbonization of process heat. Process heat can account for up to 40% of total emissions.<sup>90</sup>  
852 In products such as ethylene, up to 35% of energy consumption occurs outside the high-temperature  
853 steam cracking step.<sup>87</sup> While process heat in the conventional production setup is often generated  
854 from feedstocks or through the combustion of by-products on site, this configuration may change  
855 under a decarbonized process design.<sup>87,90</sup>

856 Decarbonization options include:<sup>86,87,90</sup>

- 857 • Direct electrification technologies for process heat (e.g., resistive heating, electric steam crackers)
- 858 • Methanol-to-olefins (MTO) or methanol-to-aromatics (MTA) pathways using green methanol
- 859 (feedstock and process heat)
- 860 • Methanol-to-olefins (MTO) or methanol-to-aromatics (MTA) pathways using blue methanol
- 861 (feedstock and process heat)
- 862 • CCUS in steam cracking (feedstock and process heat)

863 Direct electrification through resistive heating is a high-maturity option for replacing process  
 864 heat in lower-temperature separation steps. For the very high temperatures required in steam crack-  
 865 ing (electric steam crackers), maturity is low and may require substantial process redesign.<sup>90</sup> The  
 866 Methanol-to-Olefins (MTO) and Methanol-to-Aromatics (MTA) routes allow producers to synthesize  
 867 these platform chemicals from alternative carbon sources such as natural gas, coal, or CO<sub>2</sub>, rather  
 868 than naphtha.<sup>91</sup> From today’s perspective, CCUS often exhibits comparatively low marginal abate-  
 869 ment costs, but requires large-scale CO<sub>2</sub> transport and storage infrastructure<sup>87</sup> and is complicated by  
 870 the low CO<sub>2</sub> concentration in steam cracker flue gases (4–7%), which increases capture costs relative  
 871 to more concentrated streams such as those in steam reforming.<sup>88</sup>

872 Based on these considerations, we assume the following technology split. In the central case, pro-  
 873 cess heat is assumed to continue to be generated primarily from feedstocks. We assume the split  
 874 between green H<sub>2</sub> (green MTO/MTA) and CCUS (through steam cracking with CCUS and blue  
 875 MTO/MTA pathways) to be the same as for methanol. This yields a saturation rate of approx-  
 876 imately 80%. In the extended case, green H<sub>2</sub> fully outcompetes CCUS. In the restricted case,  
 877 lower-temperature process heat (up to 35%) is electrified via resistive heating, with the remaining  
 878 energy input (high-temperature process heat and feedstock) split equally between green H<sub>2</sub> and CCUS  
 879 pathways. This results in a saturation rate of approximately 30%.

880 Based on data from Methanol Institute<sup>92</sup> and Methanol Market Services<sup>93</sup> we assume methanol  
 881 production to account for approximately 8% of total output within organic chemicals, with the  
 882 remainder covered by olefins and aromatics.

### 883 Other inorganic chemicals

884 Other inorganic chemicals (beyond H<sub>2</sub>, ammonia, and synthetic gas) include products such as  
 885 soda ash, chlor-alkali chemicals, sulfuric acid and carbon black. In our database, approximately half  
 886 of estimated energy consumption in 2050 within the other inorganic chemicals segment relates to  
 887 soda ash.

888 Soda ash is produced from limestone and brine, using ammonia as a recycled catalyst. Emis-  
 889 sions and energy consumption are concentrated in the lime calcination step. In this step, calcium  
 890 carbonate is calcined to generate quicklime, which releases CO<sub>2</sub> as process emissions and requires  
 891 process temperatures of 950–1100°C.<sup>94</sup> While this process is also used in the production of lime (see  
 892 non-metallic minerals), electricity plays a more prominent role, resulting in a thermal energy share  
 893 of 75%<sup>94</sup> compared to 92% for lime.<sup>86</sup> Decarbonization options are described more extensively in  
 894 the non-metallic minerals section. Chlor-alkali production is an electrochemical process for which  
 895 full electrification is commercialized at scale.<sup>90</sup> We therefore assume chlor-alkali production to not  
 896 be addressable for green H<sub>2</sub>. Sulfuric acid is today produced mainly as a byproduct of refining pro-  
 897 cesses, which are expected to decline.<sup>95</sup> The shortfall could be replaced through sulfur mining or  
 898 with sulfuric acid generated as a byproduct in the processing of copper, gypsum, or cement.<sup>95,96</sup> We  
 899 therefore assume sulfuric acid to also not be materially addressable for green H<sub>2</sub>. Carbon black today  
 900 is produced primarily from oil or natural gas in a furnace black process, which results in significant  
 901 process emissions. Decarbonization options include direct electrification through plasma technology,  
 902 CCUS and feedstock substitution with biogas, biomass-based pyrolysis oil or e-methane. An other  
 903 option is to replace the furnace black process with methane pyrolysis, which produces solid carbon  
 904 black and H<sub>2</sub>, but needs high-temperature process heat, which again needs to be decarbonized. H<sub>2</sub> is  
 905 relevant primarily to decarbonize process heat in methane pyrolysis (where the H<sub>2</sub> generated in the  
 906 pyrolysis rather than externally sourced green H<sub>2</sub> could be used to sustain reactor temperatures) or  
 907 in a furnace black process with CCUS or feedstock substitution.<sup>97</sup> As the primary decarbonization

908 lever is feedstock substitution, we assume the role of (externally sourced) green H<sub>2</sub> in carbon black  
909 production to be negligible.

910 Based on the above, green H<sub>2</sub> potential is concentrated in soda ash. We assume the same decar-  
911 bonization options and saturation rates as for lime (see non-metallic minerals), while adjusting the  
912 non-addressable electricity share to 25%. This results in saturation rates of 7.5% for the central case,  
913 30% for the extended case, and 0% for the restricted case.

## 914 Summary

915 Based on our subsector analysis, we set saturation rates as weighted averages of the subsector  
916 saturation rates (Supplementary Table 7).

**Supplementary Table 7** Saturation assumptions for green H<sub>2</sub> in Chemicals

| Saturation scenario | Saturation rate | Rationale                                                                                                                                                                                                                                                                                                                                                           |
|---------------------|-----------------|---------------------------------------------------------------------------------------------------------------------------------------------------------------------------------------------------------------------------------------------------------------------------------------------------------------------------------------------------------------------|
| Restricted          | 35%             | Equal split between green and blue H <sub>2</sub> in ammonia and methanol (applied to H <sub>2</sub> feedstock, which dominates energy input); more limited role in olefins and aromatics due to electrification of lower-temperature heat (up to 35% of total energy input) and CCUS competition in steam cracking; no material role in other inorganic chemicals. |
| Central             | 70%             | Green H <sub>2</sub> supplies ≈80% of H <sub>2</sub> feedstock in ammonia and methanol (consistent with the supply mix in the IEA's Net Zero H <sub>2</sub> scenario), analogous split applied to MTO/MTA and steam-cracking pathways; negligible role in chlor-alkali and sulfuric acid; limited but positive role in soda ash.                                    |
| Extended            | 90%             | Green H <sub>2</sub> fully outcompetes blue H <sub>2</sub> /CCUS in ammonia, methanol, H <sub>2</sub> /syngas, and olefins/aromatics; biomass remains marginal; chlor-alkali and sulfuric acid remain non-addressable; soda ash reaches 30% saturation.                                                                                                             |

Note: Sectoral saturation rates derived by weighting subsector assumptions with estimated 2050 energy shares in the database (46% organic chemicals and polymers, 35% nitrogen-based chemicals, 8% H<sub>2</sub> and synthetic gas, 12% other inorganic chemicals). Values rounded to 5% increments.

## 917 Heat

918 The heating sector comprises space and water heating in residential buildings as well as heating  
919 demand in the commercial and services sectors. An important aspect of the decarbonization of build-  
920 ings is increasing energy efficiency in new buildings and through retrofits in the existing building stock.  
921 Increasing energy efficiency has the double benefit of reducing the amount of energy that needs to be  
922 decarbonized and, for example by lowering the heating point, prepares the ground for the adoption  
923 of decarbonization technologies such as heat pumps.<sup>98</sup>

924 Technologies for the decarbonization of heating beyond efficiency include:<sup>99,100</sup>

- 925 • Direct electrification via air-source and ground-source heat pumps
- 926 • Expansion and decarbonization of district heating systems
- 927 • Green H<sub>2</sub> boilers or hybrid heat pump systems
- 928 • Solar thermal heating
- 929 • Biomass boilers

930 Electrification through heat pumps is widely regarded as the central pathway for decarbonization  
931 of heating in Europe, supported by falling technology costs and high operational efficiencies.<sup>2</sup> For  
932 dense urban areas, extension and decarbonization of district heating systems that integrate large-  
933 scale renewable as well as waste heat sources can also play an important role.<sup>101</sup> Technical efficiency

934 in terms of power input for the generation of useful heat can reach more than 275% for individual  
935 heat pumps, and more than 300% for decarbonized district heating systems.

936 Green H<sub>2</sub> could in principle be deployed at the building level through H<sub>2</sub> combustion boilers or  
937 H<sub>2</sub> fuel cell micro-combined heat and power (micro-CHP) systems, or at the network level through  
938 H<sub>2</sub>-fired turbines or CHPs integrated into district heating systems.<sup>49</sup> Large-scale H<sub>2</sub> deployment  
939 in building heat is unlikely to be cost-effective or system-efficient relative to electrification-based  
940 pathways. In a comprehensive meta-analysis of 54 studies, Rosenow evaluates scenarios that include  
941 H<sub>2</sub> for space and water heating and finds that at-scale deployment is generally not supported.<sup>100</sup>  
942 Across studies, H<sub>2</sub> heating is associated with higher overall energy system costs, higher consumer  
943 heating costs, and in many cases higher lifecycle environmental impacts compared to alternatives such  
944 as electric heat pumps and decarbonized district heating. The reported saturation rates for green H<sub>2</sub>  
945 in heating range between 0% and 10%, with a median value of 1%.<sup>100</sup>

946 Solar thermal heating plays an ancillary role in integrated heating systems, where it can reduce  
947 system costs by contributing to water heating.<sup>99</sup> Biomass boilers can likewise be integrated into  
948 hybrid heating systems combining heat pumps and solar thermal technologies,<sup>99</sup> and may contribute  
949 to the decarbonization of heating, particularly in rural areas.<sup>102</sup>

950 The current state of project deployment reinforces this assessment. Progress in the commercial-  
951 ization and rollout of H<sub>2</sub>-ready boilers and fuel cell systems remains very limited.<sup>2</sup> Pilot projects  
952 exist, but large-scale infrastructure conversion from natural gas to H<sub>2</sub> has not materialized in most  
953 European markets.<sup>2</sup> Still, limited applications may arise in specific contexts, including hybrid H<sub>2</sub>  
954 heat pump systems in very cold climates where peak loads are high, and as a complementary fuel in  
955 certain district heating configurations.<sup>49</sup> In such cases, green H<sub>2</sub> could provide flexibility or backup  
956 capacity rather than serve as a dominant primary heat source.

957 [Supplementary Table 8](#) reports the saturation rates and assumptions based on this analysis.

**Supplementary Table 8** Saturation assumptions for green H<sub>2</sub> in heating

| Saturation scenario | Saturation rate | Rationale                                                                                                                                                                                |
|---------------------|-----------------|------------------------------------------------------------------------------------------------------------------------------------------------------------------------------------------|
| Restricted          | 0%              | Electrification and decarbonized district heating dominate; green H <sub>2</sub> remains structurally uncompetitive for space and water heating.                                         |
| Central             | 0%              | Consistent with the median value of 1% reported in the literature and the absence of large-scale deployment; green H <sub>2</sub> does not achieve material penetration at system level. |
| Extended            | 5%              | Limited niche applications in hybrid heat pump systems and selected district heating configurations; conservative midpoint within the 0–10% range reported by Rosenow. <sup>100</sup>    |

Note: Saturation values are rounded to 5% increments.

## 958 Heavy-duty transport

959 Road transport comprises several segments with differing technical requirements and corresponding  
960 decarbonization options. We focus exclusively on the heavy-duty segment (trucks), as battery elec-  
961 tric vehicles (BEVs) exhibit clear technical and economic advantages over green H<sub>2</sub> applications for  
962 two-wheelers, passenger cars, and light-duty vehicles.<sup>103</sup> For heavy-duty vehicles, however, the con-  
963 siderations differ due to higher vehicle weights and longer range requirements.<sup>50</sup> Decarbonization  
964 options include:

- 965 • Battery electric vehicles (BEVs)
- 966 • Fuel cell electric vehicles (FCEVs)
- 967 • Green H<sub>2</sub> in internal combustion engines
- 968 • E-diesel
- 969 • Biofuels

970 Competition primarily occurs between H<sub>2</sub> fuel cell electric vehicles (FCEVs) and battery elec-  
 971 tric vehicles (BEVs). Although BEVs remain the most energy-efficient option for decarbonizing  
 972 heavy-duty transport, as in passenger and light-duty segments, large vehicle classes and long-haul  
 973 applications may require very large battery capacities.<sup>50</sup> The relative performance of BEVs depends  
 974 strongly on assumptions regarding battery costs, battery pack lifetimes, and the availability of high-  
 975 power fast charging.<sup>104</sup> The deployment of high-power charging infrastructure may, in turn, require  
 976 substantial grid reinforcements.<sup>105</sup> In certain applications and vehicle classes, these constraints may  
 977 render FCEVs more attractive.<sup>50</sup>

978 Among green H<sub>2</sub> applications, fuel cells represent the technology closest to commercialization. In  
 979 contrast, the use of green H<sub>2</sub> in internal combustion engines remains at an early stage. E-diesel, which  
 980 can serve as a drop-in fuel in existing vehicles, requires fewer adjustments to refueling infrastructure  
 981 but is less energy-efficient than fuel cells.<sup>50</sup> For the purpose of our analysis, we therefore assume green  
 982 H<sub>2</sub> to be deployed primarily in FCEVs.

983 Similar to aviation, biofuels such as biodiesel constitute an additional decarbonization pathway.  
 984 Today, biofuels such as ethanol are commonly blended with conventional fuels to reduce carbon emis-  
 985 sions.<sup>106</sup> In forward-looking scenarios, however, the role of biofuels in heavy-duty transport remains  
 986 limited, reflecting supply-side constraints and competing uses in other hard-to-abate sectors.<sup>85</sup>

987 [Supplementary Table 9](#) reports the saturation rates and assumptions based on this analysis.

**Supplementary Table 9** Saturation assumptions for green H<sub>2</sub> in heavy-duty transport

| Saturation scenario | Saturation rate | Rationale                                                                                                                                                                                                                                                                                                                                 |
|---------------------|-----------------|-------------------------------------------------------------------------------------------------------------------------------------------------------------------------------------------------------------------------------------------------------------------------------------------------------------------------------------------|
| Restricted          | 0%              | BEVs dominate all heavy-duty segments, including long-haul transport, for example due to continued advances in battery technology and the successful roll-out of megawatt charging infrastructure.                                                                                                                                        |
| Central             | 25%             | FCEVs are primarily deployed in larger vehicle classes and long-haul routes. This level is broadly consistent with the projected green H <sub>2</sub> share in heavy-duty energy use in the IEA's Net Zero 2025 report. <sup>85</sup>                                                                                                     |
| Extended            | 35%             | Green H <sub>2</sub> penetration exceeds baseline expectations, for example due to grid bottlenecks limiting high-power charging, slower battery cost reductions, or battery material constraints. We assume a 10 percentage point increase relative to the central case, reflecting a stronger role for FCEVs in long-haul applications. |

Note: Saturation values refer to final energy demand and are rounded to 5% increments.

## 988 Iron & steel

989 Global iron & steel production is predominantly based on the blast furnace–basic oxygen furnace  
 990 (BF–BOF) route.<sup>86</sup> In this process, iron ore, coke, and fluxes are fed into the blast furnace (BF),  
 991 where oxygen is removed from iron ore to produce molten iron. The molten iron is then transferred  
 992 to the basic oxygen furnace (BOF), where impurities are removed to produce steel. The gaseous by-  
 993 products of this process (blast furnace gas, coke oven gas, and basic oxygen furnace gas) are utilized  
 994 on-site in combined heat and power (CHP) plants to generate electricity and heat. These gases exhibit  
 995 high emission factors (blast furnace gas has nearly four times the emission factor of natural gas).<sup>86</sup>

996 Decarbonization options for the steel sector, in most cases, require major process redesign  
 997 compared to the BF–BOF route.

998 These include the following process options:<sup>86,107,108</sup>

- 999 • Use of steel scrap in an electric arc furnace (EAF), replacing iron as input material (secondary  
 1000 steelmaking)
- 1001 • Direct electrification through electrowinning technologies such as molten oxide electrolysis, where  
 1002 electricity serves as both energy source and reduction agent

- 1003 • Direct reduction of iron (DRI) and subsequent processing in an EAF. This process relies on the  
1004 use of natural gas (with CCUS) or green H<sub>2</sub> as a reducing agent in the DRI plant, and electricity  
1005 in the EAF
- 1006 • H<sub>2</sub>-based direct steel production using flash and plasma reactors instead of an EAF
- 1007 • CCUS and efficiency improvements (e.g., smelting reduction and top gas recycling) in the  
1008 BF–BOF process
- 1009 • Substitution of solid biomass (biochar) in the BF–BOF process

1010 Secondary steelmaking is an important driver of decarbonization, as it reduces the requirement  
1011 for energy-intensive primary iron production. Today, the share of scrap in steel production amounts  
1012 to approximately 30%. This share could increase: for 2050, the World Steel Association targets a  
1013 scrap steel share of 35%, while the IEA projects a share of 55% in its Net Zero 2050 scenario. The  
1014 scrap share is strictly limited by global scrap supply.<sup>108</sup> Direct electrification technologies such as  
1015 molten oxide electrolysis remain at relatively low technical maturity compared to other production  
1016 routes.<sup>86,108</sup> Direct reduction of iron (DRI) using green H<sub>2</sub> is approaching commercial maturity and  
1017 faces few technical constraints, apart from potential shortages of DR-grade iron ore and challenges  
1018 in achieving full metallization during the final DR stages.<sup>109</sup> A large majority of green steel projects  
1019 announced in Europe plan to use green H<sub>2</sub>-based direct reduction technology.<sup>110</sup> CCUS and efficiency  
1020 improvements can markedly improve the emissions performance of the BF–BOF route. However,  
1021 retrofits such as top-gas recycling are costly,<sup>108</sup> and residual emissions (at least 14%) persist.<sup>86</sup>  
1022 Substitution of biomass in the BF–BOF process is technically feasible. However, competitiveness  
1023 depends on biomass supply chain constraints, given the large energy requirements, and the emissions  
1024 reduction potential is sensitive to life-cycle accounting.<sup>108</sup>

1025 As these processes differ substantially in the type and structure of energy input, we set saturation  
1026 rates by varying two parameters for which publicly available projection ranges exist: the share of  
1027 secondary steelmaking and the share of green H<sub>2</sub>-based direct reduction in primary steelmaking. Total  
1028 sectoral H<sub>2</sub> saturation is given by the green H<sub>2</sub> share in primary iron production multiplied by the  
1029 primary steel share (i.e., one minus the scrap share).

1030 [Supplementary Table 10](#) reports the saturation rates and assumptions based on this analysis.

**Supplementary Table 10** Saturation assumptions for green H<sub>2</sub> in iron & steel

| Saturation scenario | Saturation rate | Rationale                                                                                                                                                        |
|---------------------|-----------------|------------------------------------------------------------------------------------------------------------------------------------------------------------------|
| Restricted          | 20%             | IEA green H <sub>2</sub> share in primary iron production (44%) combined with high scrap share (55%, IEA Net Zero scenario) <sup>?</sup>                         |
| Central             | 40%             | BNEF green H <sub>2</sub> share in primary iron production (65%) combined with a moderate scrap share (35%) <sup>111</sup>                                       |
| Extended            | 70%             | Dominant role of green H <sub>2</sub> in primary iron production (100%) combined with low scrap share (approximately 30%, current global average) <sup>112</sup> |

Note: Saturation values rounded to 5% increments.

## 1031 Non-ferrous metals

1032 The non-ferrous metals sector includes the production of aluminum, copper, lead, zinc, and tin,  
1033 with aluminum (78%) and copper (18%) accounting for the major share of 2050 estimated energy  
1034 consumption recorded in our database. We therefore focus on aluminum and copper in our analysis  
1035 of saturation rates.

### 1036 Aluminum

1037 Primary aluminum is produced from bauxite in a high-temperature process. First, alumina is  
1038 refined from bauxite using caustic soda. The alumina is then processed into liquid aluminum in an  
1039 electrolysis cell. Emissions and energy consumption are concentrated in the electrolysis step, which is

1040 electricity-intensive. However, the full process (including refining) also uses significant thermal energy  
1041 (about 30% of total energy input) and carbon anodes, which result in substantial process emissions  
1042 when consumed.<sup>86</sup> Thermal energy use accounts for up to 16% of emissions. Emissions can be reduced  
1043 through the use of inert anodes, which avoid process emissions but increase electricity consumption  
1044 per tonne of aluminum by up to 20%.

1045 Beyond process redesign, decarbonization options for the remaining thermal energy input  
1046 include:<sup>86,113</sup>

- 1047 • Electrification
- 1048 • Fuel-switching to green H<sub>2</sub>
- 1049 • Fossil fuels (e.g., natural gas) combined with CCUS

1050 Green H<sub>2</sub> is a viable option in alumina refining, in the furnaces used for aluminum recycling and  
1051 aluminum casting, and, when not replaced by inert anodes, in the production of carbon anodes.<sup>113</sup>  
1052 Despite high process temperatures, direct electrification can be a viable option for bauxite processing  
1053 steps and in aluminum casting. The relevance of CCUS declines when carbon anodes are replaced  
1054 with inert anodes that do not produce process emissions, but it could still be used in connection  
1055 with the continued use of natural gas for the generation of process heat.<sup>113</sup> Given the large energy  
1056 requirements, biomass supply chain constraints and the sensitivity of emissions reduction potential  
1057 to life-cycle accounting we assume biomass to play a subordinate role in the aluminum sector.

1058 Secondary aluminum production is based on recycled aluminum and therefore skips the refining  
1059 and electrolysis steps.<sup>86</sup> While overall energy consumption is significantly lower, the potential share of  
1060 green H<sub>2</sub> in the overall energy mix increases as the share of secondary (recycled) aluminum production  
1061 rises, since the electricity-intensive steps of the value chain are eliminated. The IEA's Net Zero  
1062 scenario projects a target share of 55% for secondary aluminum production by 2050.<sup>2</sup>

## 1063 Copper

1064 Copper production involves flash smelting of concentrate in an oxygen-enriched atmosphere to  
1065 produce matte and slag, with slag treated in a slag-cleaning furnace to recover entrained copper. The  
1066 matte is converted to blister copper, refined in anode furnaces to remove residual impurities, cast into  
1067 anodes, and electrolytically refined to high-purity copper cathodes.<sup>114</sup>

1068 Green H<sub>2</sub> can replace natural gas as a reducing agent in the anode furnace and the slag-cleaning  
1069 furnace, and substitute for natural gas in the generation of process heat. This substitution can increase  
1070 specific energy demand by up to 20% compared to natural gas and metallurgical coke but, if H<sub>2</sub> is  
1071 produced on site, also yields oxygen as a byproduct, which reduces the need for electricity-intensive  
1072 oxygen production by up to 30%. Beyond process redesign, decarbonization options for the remaining  
1073 energy input used for process heat generation are analogous to those for aluminum. However, due  
1074 to melt chemistry constraints and the extremely high temperatures required, direct electrification is  
1075 considered somewhat less relevant than in other applications.<sup>114</sup>

1076 In the traditional production setup, natural gas and metallurgical coke account for approximately  
1077 45% of energy input. Adjusting for increased specific energy demand when switching to H<sub>2</sub> and  
1078 accounting for the use of the oxygen byproduct, the share increases to 55%.<sup>114</sup>

## 1079 Summary

1080 In determining saturation rates, we weight the contribution of copper at 18%, consistent with the  
1081 energy consumption recorded in our database. As the remaining metals account for less than 4% of  
1082 energy consumption, we simplify by weighting aluminum at 82%. [Supplementary Table 11](#) reports  
1083 the saturation rates and assumptions based on these considerations.

**Supplementary Table 11** Saturation assumptions for green H<sub>2</sub> in non-ferrous metals

| Saturation scenario | Saturation rate | Rationale                                                                                                                                                                                                     |
|---------------------|-----------------|---------------------------------------------------------------------------------------------------------------------------------------------------------------------------------------------------------------|
| Restricted          | 0%              | Predominant use of inert anodes and direct electrification of furnaces in aluminum; use of direct electrification and CCUS for major off-gas streams in copper                                                |
| Central             | 25%             | Realization of 50% of addressable potential in primary aluminum (30%), secondary aluminum (66%), and copper (55%), assuming a 55% secondary aluminum share. Remainder covered through direct electrification. |
| Extended            | 50%             | Realization of full addressable potential in primary aluminum (30%), secondary aluminum (66%), and copper (55%), assuming a 55% secondary aluminum share                                                      |

Note: Saturation values rounded to 5% increments.

## 1084 Non-metallic minerals

1085 The non-metallic minerals sector includes the production of cement, ceramics, glass, lime, gypsum  
 1086 and plaster. Cement (45%), ceramics (23%), glass (22%) and lime (6%) encompass the major share  
 1087 of estimated energy consumption for 2050 (as recorded in our database) for the sector.

1088 Across all major sub-sectors, emissions originate from a combination of high-temperature process  
 1089 heat and, to varying degrees, process-related chemical reactions. The relative importance of these two  
 1090 components differs across cement, lime, ceramics and glass, which in turn shapes the relative role of  
 1091 green H<sub>2</sub> in deep decarbonization pathways.

### 1092 Cement

1093 The cement production process includes raw material processing, a calcination kiln that produces  
 1094 clinker and final product finishing that processes clinker into cement. This occurs at extremely high  
 1095 process heats. Emissions and energy consumption are concentrated in the calcination step. In this  
 1096 step calcium carbonate is calcined to generate quicklime, which releases CO<sub>2</sub> as process emissions, in  
 1097 addition to emissions from process heat.<sup>86</sup> Approximately 90% of energy input is high-temperature  
 1098 process heat (1,400°C, the remainder is electricity).

1099 We separate the analysis into two components: decarbonization of process emissions and  
 1100 decarbonization of process heat.

1101 To fully avoid process emissions in the kiln, possible options include chemical lime synthesis and  
 1102 the use of alternative materials such as belite cement or magnesium oxides – all of which are of low  
 1103 technical maturity.<sup>86</sup> In this context, CCUS occupies a unique position, as it can directly capture  
 1104 and store these process emissions. Possible approaches include calcium looping, direct separation and  
 1105 oxyfuel processes (see Supplementary Figure 12 for a cost reference). Importantly, these approaches  
 1106 significantly increase required energy inputs in the form of electricity (oxyfuel and direct separation)  
 1107 and electricity and thermal energy (calcium looping). Moreover, CCUS does not eliminate all emis-  
 1108 sions, with effectiveness ranging from 65 to 96% depending on the technology.<sup>86,115</sup> This is a notable  
 1109 disadvantage of CCUS when it comes to fuel and process heat emissions – which, in contrast to pro-  
 1110 cess emissions, could be removed fully by fuel-switching – and means that the competitiveness of  
 1111 CCUS is tied strongly to carbon costs on residual carbon emissions.

1112 Decarbonization of process heat can be achieved through fuel switching to biomass or waste, green  
 1113 H<sub>2</sub>, or direct electrification (e.g., plasma torches). While direct electrification is, in general, more  
 1114 economical (see Supplementary Figure 12), in the cement context—characterized by extremely high  
 1115 process heat requirements—its technological maturity remains significantly lower than fuel switch-  
 1116 ing to biomass or green H<sub>2</sub>.<sup>86</sup> Notably, many kilns already use thermal energy biomass (17%) and  
 1117 alternative fuels (36%). However, many of these alternative fuels are carbon-based, including plastics  
 1118 (51%), industrial waste (19%) or tyres (12%).

1119 We assume that processes that are already electrified (8-13%) or using biomass (17% of thermal  
 1120 energy) are not addressable for green H<sub>2</sub>. For the remainder, we assume that green H<sub>2</sub> competes with

1121 biomass and fossil fuels and direct electrification through plasma torches. For the central case, we  
1122 assume an equal split between these technologies (reflecting the elevated uncertainty in the relative  
1123 competition between these technologies, low overall technical maturities and the lack of reliable third  
1124 party projections), yielding a H<sub>2</sub> share of approximately 20% of total energy input. For the extended  
1125 case, we assume green H<sub>2</sub> to dominate the remaining energy mix, yielding a share of approximately  
1126 70% of total energy input. For the restricted case we assume that green H<sub>2</sub> is fully outcompeted by  
1127 alternative technologies.

## 1128 **Lime**

1129 Lime production, as well as its decarbonization options, broadly follows that of cement, with  
1130 a somewhat higher share of thermal energy (92% to 97%) relative to electricity.<sup>86</sup> As in cement,  
1131 a significant share of emissions arises from calcination, implying that fuel switching to green H<sub>2</sub>  
1132 addresses combustion emissions but not process CO<sub>2</sub>. For lime we assume the same saturation rates  
1133 as for cement.

## 1134 **Ceramics**

1135 Ceramics include several final products ranging from bricks to tiles and refractories. While mate-  
1136 rials and processes differ across products, they follow a similar structure, including preparation and  
1137 shaping of raw materials, drying and firing and final treatment. Preparation and drying are low-  
1138 temperature processes (up to 90°C), while kiln firing occurs at temperatures between 1,000 and  
1139 1,300°C and incurs the largest share of energy input.<sup>86</sup>

1140 Ceramics production results in process emissions, which on average amount to 17%<sup>86</sup> but can  
1141 reach up to 30% for bricks and roof tiles.<sup>116</sup> Similar to, albeit to a lesser degree than cement, this  
1142 implies that CCUS would be required to abate these emissions fully.

1143 Decarbonization options for process heat include:

- 1144 • Direct electrification via heat pumps (drying and final treatment), spark-plasma sintering or other  
1145 electrification technologies (firing)
- 1146 • Fuel-switching to green H<sub>2</sub>
- 1147 • Fossil fuels (e.g., natural gas) combined with CCUS
- 1148 • Fuel switching to biomass

1149 Compared to cement, a larger share of ceramics emissions is combustion-related, which increases  
1150 the technical relevance of fuel switching versus CCUS. At the same time, for process steps outside  
1151 the kiln, electrification options (such as heat pumps) are comparably mature,<sup>86</sup> introducing stronger  
1152 competition between green H<sub>2</sub> and direct electrification in these process steps, given the economic  
1153 advantages of heat pumps over H<sub>2</sub> firing (see Supplementary Figure 12).

1154 In the present set-up, thermal energy input makes up approximately 65-75% of total energy input.  
1155 We assume that direct electrification to be the dominant decarbonization route for the preparation  
1156 and drying steps (approx. 25-30% of total energy input). This yields a remaining energy input of 38-  
1157 43%. In the central case, we assume green H<sub>2</sub>, biomass and direct electrification to compete equally,  
1158 resulting in a green H<sub>2</sub> saturation rate of approximately 14%. As for cement, we assume that in the  
1159 extended case, green H<sub>2</sub> dominates the remaining energy input (38-43%), and that in the restricted  
1160 case green H<sub>2</sub> is fully outcompeted.

## 1161 **Glass**

1162 As in ceramics, materials and processes vary between glass product types but follow a similar  
1163 structure. High-purity and other materials are mixed and then melted and refined in a glass furnace.  
1164 This is followed by downstream processes that include forming, annealing or surface treatment based  
1165 on the glass type. Energy input is concentrated in the glass furnace step, which occurs at high process  
1166 temperatures. Glass production incurs process emissions amounting to approximately 16% of total  
1167 emissions.<sup>86,117</sup>

1168 Options for decarbonizing process heat include: <sup>86,117</sup>

- 1169 • Direct electrification via heat pumps (drying and final treatment), spark-plasma sintering or other  
1170 electrification technologies (firing)
- 1171 • Full electric melting
- 1172 • Hybrid melting (combining electric boosting with gas combustion)
- 1173 • Fuel-switching to green H<sub>2</sub>
- 1174 • Fossil fuels (e.g., natural gas) combined with CCUS
- 1175 • Fuel switching to biomass

1176 H<sub>2</sub> can be employed for all glass types using existing production processes. While electric melting  
1177 can reach high efficiencies (up to 85%), it can be applied only to around 80% of glass types. The  
1178 fluctuating composition of biogas can disrupt production consistency, which limits its use in certain  
1179 glass applications. Oxy-fuel combustion, which burns fuel with purified oxygen, can reduce energy  
1180 consumption by 10–20% and is synergetic with CCUS, as it reduces exhaust volumes and increases  
1181 CO<sub>2</sub> concentrations in the off-gas. Oxy-fuel combustion is already employed in the production of some  
1182 specialized glasses.<sup>117</sup> Technical maturity is high across all technologies, although electric melting  
1183 today is restricted mainly to small and medium size furnaces (<300 tonnes per day).

1184 Based on these considerations, we assume green H<sub>2</sub> to be employed mainly in the glass furnace  
1185 step, where it competes with electric melting and biogas and is relevant, in particular for specialty  
1186 glass applications that require a consistent fuel mix and for larger-scale applications.

1187 Thermal energy in the glass furnace accounts for approximately 84% of total energy inputs. In  
1188 the central case, we assume green H<sub>2</sub>, biomass and direct electrification to compete equally, resulting  
1189 in a green H<sub>2</sub> saturation rate of approximately 30%. As for cement and ceramics, we assume that in  
1190 the extended case, green H<sub>2</sub> dominates the remaining energy input (84%), and that in the restricted  
1191 case green H<sub>2</sub> is fully outcompeted.

1192 To set overall saturation rates, we weight cement, lime, ceramics and glass to their respective  
1193 shares in our database, and take the average for the remaining 4% of energy input. [Supplementary](#)  
1194 [Table 12](#) reports the saturation rates and assumptions based on this analysis.

**Supplementary Table 12** Saturation assumptions for green H<sub>2</sub> in non-metallic minerals

| Saturation scenario | Saturation rate | Rationale                                                                                                                                                                                                                                                                                                                |
|---------------------|-----------------|--------------------------------------------------------------------------------------------------------------------------------------------------------------------------------------------------------------------------------------------------------------------------------------------------------------------------|
| Restricted          | 0%              | Direct electrification, biomass and CCUS outperform green H <sub>2</sub> across cement, lime, ceramics and glass.                                                                                                                                                                                                        |
| Central             | 20%             | Weighted average across sub-sectors based on process-step addressability and equal competition in remaining high-temperature applications. Sub-sector saturation rates amount to approx. 18% in cement and lime, 14% in ceramics, 28% in glass and 20% in the remaining 4% of energy use, yielding 20% overall (rounded) |
| Extended            | 70%             | Green H <sub>2</sub> dominates remaining addressable thermal energy across sub-sectors (cement and lime ≈74%, ceramics ≈43%, glass ≈81%, remaining 4% ≈68%), yielding a weighted average of 70% (rounded)                                                                                                                |

Note: Saturation values rounded to 5% increments.

## 1195 Other

1196 The “Other” category comprises all installations that cannot be clearly assigned to one of the  
1197 hard-to-abate industry groups explicitly covered in this analysis. It includes three main types of facil-  
1198 ities: manufacturing plants (e.g., automotive, electronics, furniture), agro-industrial plants (notably  
1199 sugar production), and mining, quarrying, and upstream metals and minerals processing operations

1200 (including iron ore and magnesite extraction and processing). Within this category, sugar produc-  
1201 tion accounts for more than 20% of estimated energy consumption in 2050, while mining, quarrying  
1202 and related upstream processing activities account for approximately 12%. Representative facilities  
1203 include LKAB’s iron ore operations in Kiruna, Sweden, magnesite mining and processing facilities  
1204 operated by RHI and Magnesitas Navarras in Austria and Spain, and large sugar processing plants  
1205 such as the Suedzucker facility in Zeitz, Germany.

## 1206 **Manufacturing plants**

1207 Manufacturing plants include plants from the automotive industry as well as producers of furniture  
1208 and wood products. In the automotive sector, half of all energy consumption is already electricity. The  
1209 remaining thermal energy is mainly low-to-medium temperature process heat, with metal casting and  
1210 processing steps (e.g., in the body shop and in powertrain assembly) being the highest temperature  
1211 processes at 430-750°C.<sup>118</sup>

## 1212 **Agro-industrial plants**

1213 Agro-industrial plants include plants for the manufacture of sugar, starch and other food process-  
1214 ing plants. Sugar and starch processing plants frequently operate lime kilns that decompose calcium  
1215 carbonate into CO<sub>2</sub> and quicklime for juice purification, which require high-temperature process heat  
1216 (see non-metallic minerals section).<sup>119</sup> Sugar plants also include high-temperature drying of beet  
1217 pulp requires process heat in the range of approximately 500–750°C and can account for up to 50%  
1218 of plant-level energy consumption when installed.<sup>119</sup> However, these energy needs can also be met  
1219 using biomass derived from process residues. By comparison, the lime kiln accounts for roughly 5%  
1220 of total energy input in a typical sugar plant.<sup>119</sup>

## 1221 **Mining, quarrying and upstream metals and minerals processing**

1222 Mining and quarrying operations, including iron ore pelletizing, sintering and magnesite process-  
1223 ing, require high-temperature process heat and therefore represent the primary applications in which  
1224 green H<sub>2</sub> may play a role. Even with a switch to green H<sub>2</sub>, however, both magnesite processing and  
1225 lime kilns continue to generate process emissions from carbonate decomposition, implying that CCUS  
1226 remains relevant for full decarbonization.

## 1227 **Summary**

1228 In this heterogeneous category, energy consumption broadly includes electricity, low- and medium-  
1229 temperature process heat, and select high-temperature processes (in particular iron ore processing,  
1230 magnesite processing and lime kilns in sugar and starch processing plants). Decarbonization options  
1231 therefore differ across applications and include:

- 1232 • Direct electrification of low- and medium-temperature heat (e.g., steam-generating heat pumps  
1233 and mechanical vapor recompression)
- 1234 • Fuel-switching to green H<sub>2</sub> for high-temperature process heat in mineral processing and lime kilns
- 1235 • CCUS applied to high-temperature processes with process emissions
- 1236 • Fuel-switching to biomass from process residues (e.g., beet pulp in sugar production)

1237 We assume that low- and medium-temperature heat demand in manufacturing as well as in  
1238 non-thermal components of sugar and mining operations is largely electrified. After excluding these  
1239 electrifiable shares, slightly more than 30% of total energy consumption within the “Other” category  
1240 remains associated with high-temperature processing in mining, quarrying, upstream mineral process-  
1241 ing, and selected agro-industrial units. This residual high-temperature segment defines the technical  
1242 potential for green H<sub>2</sub> deployment in this category. [Supplementary Table 13](#) reports the saturation  
1243 rates and assumptions based on this analysis.

**Supplementary Table 13** Saturation assumptions for green H<sub>2</sub> in the “Other” category

| Saturation scenario | Saturation rate | Rationale                                                                                                                                                                                                    |
|---------------------|-----------------|--------------------------------------------------------------------------------------------------------------------------------------------------------------------------------------------------------------|
| Restricted          | 0%              | Low- and medium-temperature heat electrified; high-temperature processes decarbonized via CCUS and biomass where applicable.                                                                                 |
| Central             | 5%              | Green H <sub>2</sub> deployed in approximately half of high-temperature iron ore and magnesite processing; remaining high-temperature units rely on CCUS. Sugar lime kilns decarbonized via biomass or CCUS. |
| Extended            | 10%             | Green H <sub>2</sub> deployed in most high-temperature iron ore and magnesite processing and in lime kilns (corresponding to roughly 1% of total energy in the “Other” category).                            |

Note: Saturation values rounded to 5% increments.

## 1244 Power

1245 Decarbonization of electricity generation is expected to occur mainly through the deployment of  
 1246 renewable generation like wind and solar, which replace fossil-based thermal power generation. The  
 1247 main challenge in this process is the decarbonization of the dispatchable generation required to  
 1248 meet consumption peaks and ensure system reliability.<sup>120</sup> Possible technology pathways include the  
 1249 replacement of fossil generation through:<sup>121,122</sup>

- 1250 • Green H<sub>2</sub> (co-)firing in repurposed natural gas plants
- 1251 • Dispatchable renewable generation like biomass and hydropower
- 1252 • Natural gas plants with CCUS
- 1253 • Replacement of dispatchable generation with energy storage solutions (such as large-scale battery  
 1254 systems)

1255 The generation and re-electrification of H<sub>2</sub> is subject to substantial energy losses.<sup>2</sup> As such, H<sub>2</sub>  
 1256 power generation is generally only considered as an option for the decarbonization of dispatchable  
 1257 power, and not electricity systems at large. This is consistent with our definition of the addressable  
 1258 installation base, which includes only natural gas peaker plants that could be retrofitted to run on  
 1259 green H<sub>2</sub> (see Offtaker database in the Methods section and [Supplementary Note 9](#)). Assuming a  
 1260 typical capacity factor of around 15%,<sup>123</sup> these plants correspond to slightly more than 10% of total  
 1261 EU electricity generation.

1262 Natural gas with CCUS allows existing thermal infrastructure to continue providing firm capac-  
 1263 ity, although its long-term viability depends on the effectiveness of carbon removal, and the pricing of  
 1264 residual carbon and methane emissions. Biomass and hydropower function as key renewable dispatch-  
 1265 able sources: biomass can supply reliable peak capacity and achieve emission reductions exceeding  
 1266 85% when substituting for fossil fuels; pumped hydropower in particular is a cornerstone for seasonal  
 1267 balancing. Both biomass and hydropower are broadly deployed commercially but further expansions  
 1268 are restricted by biomass availability, geographic conditions and weather-dependent inflows. Large-  
 1269 scale battery systems are highly effective in managing short-term, hourly variability and shifting solar  
 1270 surpluses to evening peak demand, but they remain less suitable for addressing long-term seasonal  
 1271 imbalances compared to thermal or hydropower-based options.<sup>124</sup>

1272 In its Net Zero scenario, the IEA projects green H<sub>2</sub> generation to make up approximately 1% of  
 1273 total power generation in 2050 (equivalent to around 10% of dispatchable generation).<sup>85</sup> Oshiro and  
 1274 Fujimori find that, depending on the stringency of emissions targets, this share ranges from 0 to 2%  
 1275 of total generation (equivalent to up to around 20% of dispatchable generation, with slightly below  
 1276 1% in the default scenario).<sup>122</sup> While there are no binding commitments on an EU level, some EU  
 1277 member states have set ambitious targets for the use of H<sub>2</sub> in the power sector: Germany’s draft  
 1278 power plant strategy requires all newly built natural gas power plants to run on green H<sub>2</sub> by 2045, in  
 1279 effect resulting in a full replacement of natural gas with green H<sub>2</sub> over time as legacy plants retire.<sup>64</sup>

1280 Based on the considerations above, we set saturation rates relative to the existing dispatchable  
 1281 generation base, defined here as natural gas peaker plants that could technically be retrofitted to run  
 1282 on green H<sub>2</sub>. Saturation rates and assumptions are reported in [Supplementary Table 14](#).

**Supplementary Table 14** Saturation assumptions for green H<sub>2</sub> in dispatchable power generation

| Saturation scenario | Saturation rate | Rationale                                                                                                                                                                                                                                                                      |
|---------------------|-----------------|--------------------------------------------------------------------------------------------------------------------------------------------------------------------------------------------------------------------------------------------------------------------------------|
| Restricted          | 0%              | Dispatchable power is provided exclusively by renewable dispatchable generation, energy storage systems, or natural gas power plants with CCUS.                                                                                                                                |
| Central             | 10%             | A share of today's natural gas-based dispatchable generation (10%, equivalent to around 1% of total electricity generation) switches to H <sub>2</sub> . This aligns with the IEA's Net Zero scenario <sup>85</sup> and projections in the academic literature. <sup>122</sup> |
| Extended            | 100%            | All natural gas-based dispatchable generation today (100%, equivalent to around 10% of total electricity generation) switches to H <sub>2</sub> . This assumes EU-wide adoption of H <sub>2</sub> -ready dispatchable plants and gradual retirement of legacy gas units.       |

Note: Saturation values refer to the share of dispatchable generation (defined as natural gas peaker plants with an assumed capacity factor of 15%) that switches to green H<sub>2</sub>. Values are rounded to 5% increments.

## 1283 Pulp & paper

1284 The pulp & paper sector includes the production of pulp, cartonboard, and various paper products  
 1285 (corrugated and non-corrugated paper, tissue, newsprint, etc.). Pulp is produced from wood either  
 1286 mechanically, chemically (kraft process), or from recycled paper. Mechanical pulping is electricity-  
 1287 intensive, whereas chemical pulping relies more strongly on thermal energy. Much of this thermal  
 1288 energy is internally supplied through the combustion of black liquor, a biogenic by-product of the  
 1289 pulping process.<sup>86</sup>

1290 Following pulping, fibers are processed and formed into paper through successive mechanical  
 1291 treatment and drying steps. The drying section represents the most energy-intensive stage of paper  
 1292 production and requires substantial amounts of low- to medium-temperature steam.<sup>86</sup> In most  
 1293 applications, required process temperatures remain below 200°C.<sup>86</sup>

1294 In chemical (kraft) pulping, the recovery cycle includes a lime kiln in which calcium carbonate is  
 1295 calcined to regenerate quicklime, which releases CO<sub>2</sub> as process emissions. However, as the carbon  
 1296 originates from biogenic feedstock, these emissions are typically classified as biogenic rather than  
 1297 fossil.<sup>125</sup> One tonne of pulp requires approximately 0.25 tonnes of lime.<sup>126</sup> Based on an energy  
 1298 consumption of 3.71 GJ per tonne of lime (see Extended Data Table 6), the lime kiln accounts for  
 1299 approximately 13% of the energy use within the recovery cycle. In an integrated pulp & paper mill,  
 1300 this corresponds to about 10% of total energy input excluding black liquor (or about 3–4% when  
 1301 black liquor is included).<sup>86</sup>

1302 For decarbonizing remaining process heat demand, options include:<sup>86,127</sup>

- 1303 • Direct electrification (e.g., steam-generating heat pumps or electric boilers)
- 1304 • Fuel-switching to green H<sub>2</sub>
- 1305 • Fossil fuels (e.g., natural gas) combined with CCUS
- 1306 • Fuel-switching to biomass

1307 Energy efficiency measures can be applied extensively across the sector, particularly in drying  
 1308 processes and steam system optimization. Chemical pulping is largely energy self-sufficient due to the  
 1309 use of black liquor in recovery boilers.<sup>86</sup> As of 2022, approximately 40% of global energy consumption  
 1310 in the pulp & paper sector was covered by bioenergy, most prominently black liquor.<sup>128</sup>

1311 For the remaining energy consumption, direct electrification—primarily through industrial heat  
 1312 pumps and electric boilers—appears technically feasible for most low- and medium-temperature heat  
 1313 applications and is often economically favorable due to higher system efficiencies.<sup>128</sup> Green H<sub>2</sub> can  
 1314 in principle be integrated through the retrofit of existing natural gas boilers and high-temperature  
 1315 lime kilns,<sup>127</sup> but its role is likely limited to selected high-temperature applications or cases where  
 1316 electrification is constrained.

1317 Based on these considerations, we set saturation rates for green H<sub>2</sub> in the pulp & paper sector  
 1318 as follows. In both the central and restricted cases, we assume that self-sufficient chemical pulp-  
 1319 ing plays a dominant role in pulp production, that low-temperature processes are predominantly  
 1320 electrified, and that the remaining high-temperature processes (mainly the lime kiln in the recov-  
 1321 ery cycle) are decarbonized through biomass substitution. For the extended case, we assume these  
 1322 high-temperature processes to be decarbonized with green H<sub>2</sub>. Saturation rates and assumptions are  
 1323 reported in [Supplementary Table 15](#).

**Supplementary Table 15** Saturation assumptions for green H<sub>2</sub> in pulp & paper

| Saturation scenario | Saturation rate | Rationale                                                                                                                                                                                                          |
|---------------------|-----------------|--------------------------------------------------------------------------------------------------------------------------------------------------------------------------------------------------------------------|
| Restricted          | 0%              | Predominant use of energy self-sufficient chemical pulping and elec-<br>trification of low-temperature process heat. Residual fossil demand<br>addressed through efficiency improvements and biomass substitution. |
| Central             | 0%              | As in the restricted case, given limited structural need for H <sub>2</sub> in<br>predominantly low-temperature heat applications.                                                                                 |
| Extended            | 10%             | Conversion of lime kiln in the recovery process to green H <sub>2</sub> .                                                                                                                                          |

Note: Saturation values rounded to 5% increments. Since the energy consumption factors used to estimate pulp & paper energy demand (Extended Data Table 6) exclude black liquor, saturation rates are defined relative to energy inputs excluding black liquor. The 10% value therefore corresponds to the lime kiln share relative to non-biogenic energy inputs. We deliberately do not distinguish between the restricted and central cases, as the structural role for green H<sub>2</sub> in predominantly low-temperature heat applications appears limited across most decarbonization pathways.

## 1324 Refining

1325 The refining sector today is dominated by the refining of crude oil into fuels: about 75% of products  
 1326 produced in European refineries today are related to fuels for the transport sector such as gas oil, diesel  
 1327 oil, motor gasoline or kerosene.<sup>129</sup> Further products, such as liquefied petroleum gas or petroleum  
 1328 coke, decline with the decarbonization of industry and building heat.

1329 Yet some refinery processes are likely to persist even in deep decarbonization scenarios. This  
 1330 includes the production of naphtha, lubricants or raw materials for the chemical industry. Refinery  
 1331 processes are also likely to change, as naphtha, the main feedstock for chemicals such as aromatics,  
 1332 ethylene or propylene, is today co-produced with fuels for the transport sector.<sup>130</sup> As a consequence,  
 1333 future refinery configurations are expected to resemble chemical plants rather than conventional fuel  
 1334 refineries, with a stronger focus on naphtha, aromatics, and other chemical intermediates.

1335 Options to decarbonize these remaining processes include:<sup>130,131</sup>

- 1336 • Synthetic carbon pathways using green H<sub>2</sub> and captured or biogenic CO<sub>2</sub>
- 1337 • Synthetic carbon pathways using blue H<sub>2</sub> and captured or biogenic CO<sub>2</sub>
- 1338 • Bio-based feedstocks such as bio-naphtha

1339 Decarbonization occurs primarily through feedstock replacement. For instance, fossil naphtha  
 1340 for the production of olefins or aromatics can be replaced through a methanol-to-olefins (MTO)  
 1341 production route that builds on green or blue H<sub>2</sub> (see organic chemicals and polymers in the chemicals  
 1342 section). Alternatively, fossil feedstocks can be replaced by biomass-based feedstocks such as bio-  
 1343 naphtha.<sup>132</sup> RED III requires at least 60% of industrial H<sub>2</sub> use to consist of renewable fuels of  
 1344 non-biological origin (RFNBO, conceptually equivalent to green H<sub>2</sub>) by 2035.<sup>10</sup>

1345 Due to large structural shifts in refinery processes in the context of the decarbonization of transport  
 1346 and industry, setting saturation rates for the refining sector is challenging. We use Eurostat’s product  
 1347 break-down for an approximation. To that purpose, we assume that of today’s refinery portfolio, the  
 1348 production of (decarbonized) naphtha, bitumen, lubricants, and some other industrial oil products  
 1349 (e.g., spirits, waxes) are required as upstream inputs even in full decarbonization scenarios. We assume  
 1350 bitumen and lubricants (23%) to be produced via a bio-feedstock route, and the remaining 77% to be  
 1351 decarbonized through a synthetic carbon pathway using biogenic or atmospheric CO<sub>2</sub> and H<sub>2</sub> (e.g.,  
 1352 via methanol). We assume 60% of this, corresponding to the EU’s RED III target, to be produced  
 1353 from green H<sub>2</sub>.<sup>10</sup> For the central case, we raise this share to 80%, and for the extended case to 100%,  
 1354 assuming increasing competitiveness of green relative to blue H<sub>2</sub>, for example due to methane leakage  
 1355 penalties. Multiplying these shares yields green H<sub>2</sub> saturation levels of approximately 46%, 62%, and  
 1356 77% of refinery H<sub>2</sub> demand, respectively (see [Supplementary Table 16](#)).

**Supplementary Table 16** Saturation assumptions for green H<sub>2</sub> in refining

| Saturation scenario | Green H <sub>2</sub> share of refinery H <sub>2</sub> demand | Rationale                                                                                                                                                                                                                                                                                                                                                                                         |
|---------------------|--------------------------------------------------------------|---------------------------------------------------------------------------------------------------------------------------------------------------------------------------------------------------------------------------------------------------------------------------------------------------------------------------------------------------------------------------------------------------|
| Restricted          | 45%                                                          | Green H <sub>2</sub> supplies 45% of refinery H <sub>2</sub> demand by 2050. Its use is largely limited to compliance with EU mandates, while blue H <sub>2</sub> remains cost-competitive in non-bitumen and lubricant processes and continues to account for a substantial share of supply.                                                                                                     |
| Central             | 60%                                                          | Green H <sub>2</sub> reaches 60% of refinery H <sub>2</sub> demand by 2050. Both green and blue H <sub>2</sub> are deployed in parallel across non-bitumen and lubricant processes, reflecting moderate cost convergence and diversified decarbonization strategies within integrated refinery–chemical complexes.                                                                                |
| Extended            | 75%                                                          | Green H <sub>2</sub> supplies 75% of refinery H <sub>2</sub> demand by 2050. This assumes that green H <sub>2</sub> becomes structurally more competitive than blue H <sub>2</sub> , driven by declining renewable electricity costs, rising natural gas prices, and additional methane leakage penalties, resulting in dominance of green H <sub>2</sub> in non-bitumen and lubricant processes. |

Note: Saturation values rounded to 5% increments.

## 1357 Shipping

1358 Decarbonizing the shipping sector remains structurally challenging because the global fleet currently  
 1359 relies almost entirely on fossil fuels and vessels exhibit long technical lifetimes and slow fleet turnover.  
 1360 Decarbonization will therefore require large-scale fuel and vessel substitution, and the development  
 1361 of associated bunkering infrastructure remain major constraints.<sup>133</sup>

1362 The principal decarbonization options include:<sup>50,133</sup>

- 1363 • Direct electrification using batteries
- 1364 • E-fuels generated from green H<sub>2</sub> (e.g., ammonia, e-methanol, e-methane, e-diesel)
- 1365 • E-fuels generated from blue H<sub>2</sub> (e.g., ammonia, e-methanol, e-methane, e-diesel)
- 1366 • Biofuels (e.g., biodiesel, biomethanol)

1367 For short-range vessels and inland shipping, direct electrification via batteries can be a viable  
 1368 option, as the requirement for energy stored onboard is significantly lower.<sup>50</sup> All candidate fuels are  
 1369 expected to reach commercial maturity by around 2030.<sup>134</sup> Within e-fuels, ammonia and methanol

1370 are comparable in terms of overall efficiency and, in contrast to cryogenic liquid H<sub>2</sub>, easier to handle in  
 1371 transport and storage. Both fuels face specific challenges: methanol requires a source of concentrated  
 1372 CO<sub>2</sub>, which makes its cost dependent on the availability of low-cost CCUS, while ammonia is highly  
 1373 toxic and can produce nitrous oxide, a greenhouse gas, when combusted.<sup>50</sup> As for aviation, e-fuels  
 1374 can also be generated from blue H<sub>2</sub>, which is produced from natural gas using CCUS. Biofuels are  
 1375 compatible with existing ships and infrastructure, making them a feasible option for replacing fossil  
 1376 fuels in the short term. However, similar to biofuels for aviation, supply is subject to constraints and  
 1377 may not be sufficient to meet long-term demand.<sup>133</sup>

1378 At present, most (more than 55%) new ship orders equipped with alternative fuel technology still  
 1379 use fossil-based technologies including liquefied natural gas (LNG) or liquefied petroleum gas (LPG),  
 1380 23% are battery or hybrid-battery based, and 19% use H<sub>2</sub>-based e-fuels, primarily methanol.<sup>133</sup> Future  
 1381 projections diverge substantially with respect to the relative shares of biofuels and H<sub>2</sub>-derived e-fuels.  
 1382 In a review of projections from eight public sector and commercial sources, Lloyd’s Register finds  
 1383 both biofuel-dominant and H<sub>2</sub>-dominant scenarios. Within the H<sub>2</sub>-dominant scenarios, fuels derived  
 1384 from green H<sub>2</sub>, excluding blue ammonia, account on average for 63% of maritime fuel demand. By  
 1385 contrast, within the biofuel-dominant scenarios, the corresponding share of fuels derived from green  
 1386 H<sub>2</sub> amounts to 16%. Across all scenarios, the share of H<sub>2</sub> derived fuels (including green and blue H<sub>2</sub>,  
 1387 ammonia and methanol) averages approximately 47%.<sup>135</sup>

1388 Based on the discussion above, we set saturation rates as follows: For the central case, we assume  
 1389 an overall share of H<sub>2</sub>-derived fuels of 47% (the average across all scenarios recorded by Lloyd’s  
 1390 Registers)<sup>135</sup> and that, consistent with our assumptions for the aviation and chemicals sectors, 80%  
 1391 of these are generated from green rather than blue H<sub>2</sub>, yielding a saturation rate of 35%. This value  
 1392 is also consistent with the 35% e-fuel target defined for aviation under the EU ReFuelEU framework,  
 1393 which we use as an additional policy anchor. For the extended case, we follow the IEA’s Net Zero  
 1394 scenario (80% share of H<sub>2</sub>-derived e-fuels relative to biofuels) and again assume 80% of these to be  
 1395 generated from green H<sub>2</sub>, yielding a 60% saturation rate (see [Supplementary Table 17](#)).

**Supplementary Table 17** Saturation assumptions for green H<sub>2</sub> in shipping

| Saturation scenario | Saturation rate | Rationale                                                                                                                                                                                                                                                                                                                                                                                                                  |
|---------------------|-----------------|----------------------------------------------------------------------------------------------------------------------------------------------------------------------------------------------------------------------------------------------------------------------------------------------------------------------------------------------------------------------------------------------------------------------------|
| Restricted          | 0%              | Maritime transport continues to rely predominantly on advanced biofuels and efficiency improvements, while H <sub>2</sub> -based e-fuels do not achieve large-scale deployment. Sustainable biomass supply is assumed to remain sufficient, and infrastructure constraints together with high fuel production costs limit e-fuel uptake.                                                                                   |
| Central             | 35%             | H <sub>2</sub> -based e-fuels reach 35% penetration of maritime fuel demand by 2050. This reflects a balanced fuel mix in which biofuels and e-fuels are deployed in parallel, while battery-electric vessels serve short-distance and coastal routes.                                                                                                                                                                     |
| Extended            | 60%             | Green H <sub>2</sub> -based e-fuels supply 60% of maritime fuel demand by 2050 (anchored to IEA projection). This assumes that constrained sustainable biomass availability reduces long-term biofuel competitiveness, while large-scale renewable H <sub>2</sub> production and fuel synthesis infrastructure are successfully deployed. Battery-electric vessels remain limited to selected short-distance applications. |

Note: Saturation values rounded to 5% increments.

1396 **2.3 SN7: Demand projections under different carbon price regimes**

1397 As discussed in [Supplementary Note 5](#), we rely on cost estimates from Odenweller and Ueckerdt<sup>42</sup> for  
 1398 simulation purposes. These have built-in assumptions on carbon pricing, which are based on the work  
 1399 of Sitarz et al,<sup>75</sup> who estimate the marginal ETS carbon prices required for meeting EU policy goals  
 1400 as set forwards in the Fit for 55 package.<sup>136</sup> While this trajectory is consistent with carbon prices  
 1401 following the tightening of the ETS cap through the Market Stability Reserve and Fit for 55 reforms,  
 1402 their model does foresee a very significant increase of carbon prices (see [Supplementary Figure 13](#)).

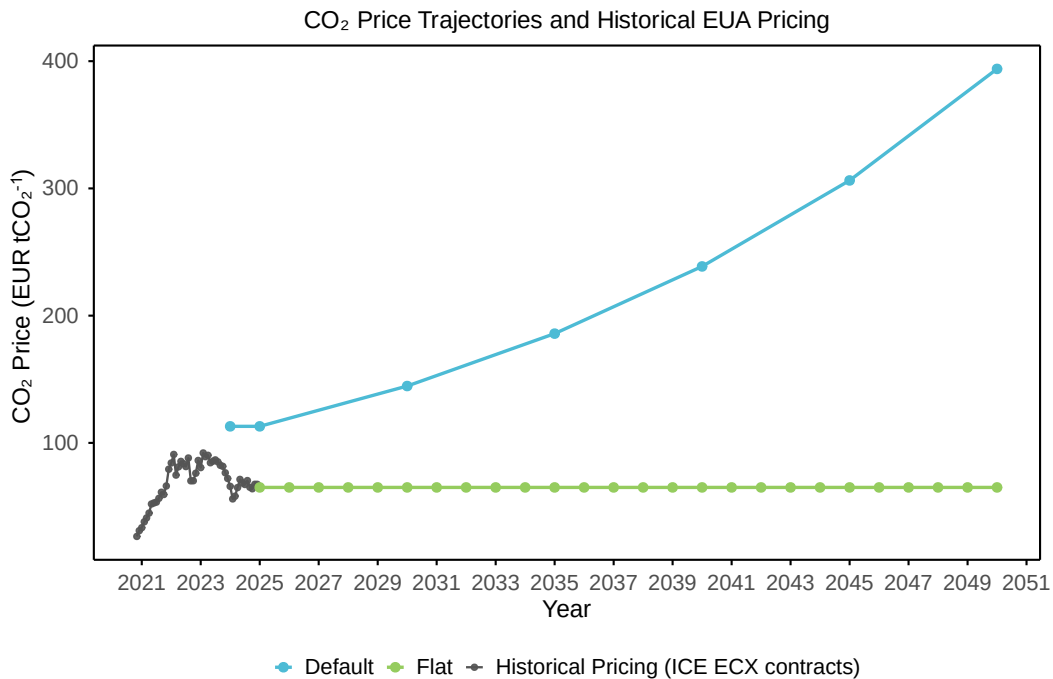

**Supplementary Figure 13 Carbon price projections in EUR/t CO<sub>2</sub> equivalent.** Default carbon price projections used in the baseline simulation presented in the main article are based on Sitarz et al.<sup>75</sup> Flat carbon prices are based on the average realized carbon price in 2024. Historical carbon prices are based on ICE ETX contracts and are drawn from S&P Capital IQ. Note that default carbon prices escalate significantly beyond the current level reflecting the carbon pricing required to achieve the EU’s Fit for 55 policy goals.

1403 To assess the model’s sensitivity to carbon price assumptions and investigate the impact of carbon  
 1404 pricing policy on green H<sub>2</sub> diffusion, we simulate an alternative environment, whereby the carbon price  
 1405 remains constant at the average secondary market value realized in 2024 (approximately 65 EUR per  
 1406 tonne of CO<sub>2</sub> equivalent). The results of this simulation are reported in [Supplementary Figure 14](#).

1407 Results show that the model is sensitive to carbon pricing policy. While the results presented  
 1408 in the main article show substantial diffusion of green H<sub>2</sub>, despite shortfalls versus policy targets,  
 1409 diffusion takes off before 2050 only under progressive H<sub>2</sub> cost assumptions. In the *mean cost + central*  
 1410 *saturation* case, the gap between the 2050 policy target and estimated diffusion amounts to 48.5 Mt,  
 1411 or 97%. This underscores that for achieving stated targets and limiting the requirement for further  
 1412 policy interventions, an ambitious carbon pricing regime is critical.

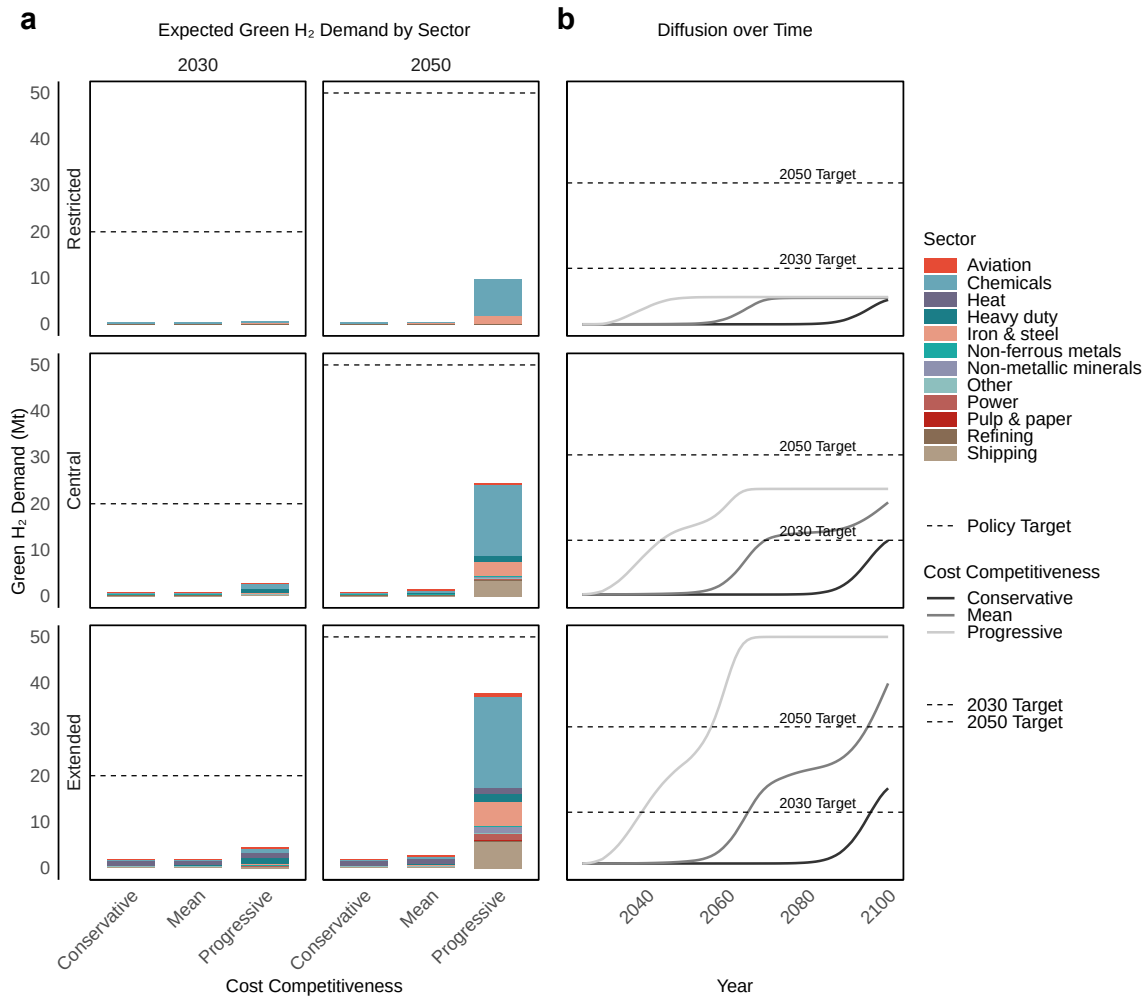

**Supplementary Figure 14 Baseline projections of expected green H<sub>2</sub> before policy interventions assuming flat carbon prices.** Expected green H<sub>2</sub> demand in 2030 and 2050 under combinations of green H<sub>2</sub> cost trajectories (conservative, mean, progressive) and saturation assumptions (restricted, central, extended). **a** Each box shows cumulative H<sub>2</sub> diffusion in million tonnes (Mt) across sectors, colored according to sector classification. Dashed lines indicate policy targets of 20 Mt green H<sub>2</sub> demand by 2030, and 50 Mt (10% of final energy demand) by 2050. **b** Time series of green H<sub>2</sub> diffusion between 2024 and 2100 disaggregated by saturation level. Green H<sub>2</sub> cost trajectories are shown in varying shades of grey. Under flat carbon prices, demand is almost fully suppressed until 2050.

## 1413 2.4 SN8: Policy effectiveness under alternative baseline demand 1414 projections

1415 For clarity, the main article only reports the policy effectiveness analysis against the baseline demand  
1416 projection that uses the *mean* cost and *central* saturation case. This scenario can be thought of  
1417 as the "median" scenario when it comes to projected green H<sub>2</sub> demand. [Supplementary Figure 15](#)  
1418 and [Supplementary Figure 16](#) report the result of the same policy interventions presented in the  
1419 main paper (a CfD controlling for sector, cost and size ([Supplementary Figure 15](#)) and an EHB-style  
1420 auction([Supplementary Figure 16](#))).

1421 [Supplementary Figure 15](#) reports the differences in annual green H<sub>2</sub> demand and policy cost  
1422 effectiveness for all possible specifications of the baseline projections. The results reported in the  
1423 main paper – for the central saturation and mean cost competitiveness scenario – hold across most  
1424 specifications of the baseline. Targeting high-centrality offtakers on average increases annual green  
1425 H<sub>2</sub> demand and cost-effectiveness in the restricted and central saturation scenarios. This is consistent  
1426 with the patterns presented in the main article. In the extended saturation case, however, the result  
1427 does not hold for policy effectiveness (and in the case of betweenness centrality, annual demand). In  
1428 contrast, targeting high-centrality offtakers can result in an increased policy cost per unit of induced  
1429 green H<sub>2</sub> demand.

1430 This diverging result can be tied back to the underlying economics of the sectors included in the  
1431 extended scenario. This case extends non-zero saturation rates to several sectors, where green H<sub>2</sub>  
1432 is expected to remain structurally uncompetitive in the medium to long term (e.g., heating). This  
1433 results in CfD interventions targeting these sectors incurring high policy costs. This disproportionately  
1434 penalizes the high-centrality targeting strategies, as centrality is structurally correlated with demand  
1435 volumes and highly central offtakers are more likely to adopt when targeted by the CfD. These  
1436 additional costs are not offset by increases in demand. This is also consistent with the pattern observed  
1437 between different cost cases, where, in the extended case, high-centrality targeting performs best in  
1438 the progressive cost scenario, where the cost differential is more limited even for uncompetitive sectors.

1439 This result carries a relevant policy implication: When extended broadly, to sectors where the  
1440 cost competitiveness of green H<sub>2</sub> is especially low (e.g., heating), cost-linked policy interventions that  
1441 target offtakers with high spatial spillover potential might result in an increase in H<sub>2</sub> demand, but at  
1442 prohibitive policy cost.

1443 Results for the EHB-style auction setting show the same patterns as in the controlled setting.  
1444 ([Supplementary Figure 16](#)).

1445 In the main article, we represent results for an EHB-style auction setting that is augmented  
1446 with a spatial spillover component, weighted at 10%. [Supplementary Figure 17](#) reports results for  
1447 a range of weights. Consistent with the results from above, augmenting the auction with a spatial  
1448 spillover component only improves policy outcomes up to a certain extent: For weights above 20%,  
1449 the additional policy costs that come from targeting offtakers with low cost competitiveness outweigh  
1450 the spatial spillover benefits. Accordingly, to optimize policy cost efficiency, adjusting the auction  
1451 design to include a demand-side component (e.g., spatial spillover potential), is preferable to fully  
1452 replacing cost competitiveness as a criterion.

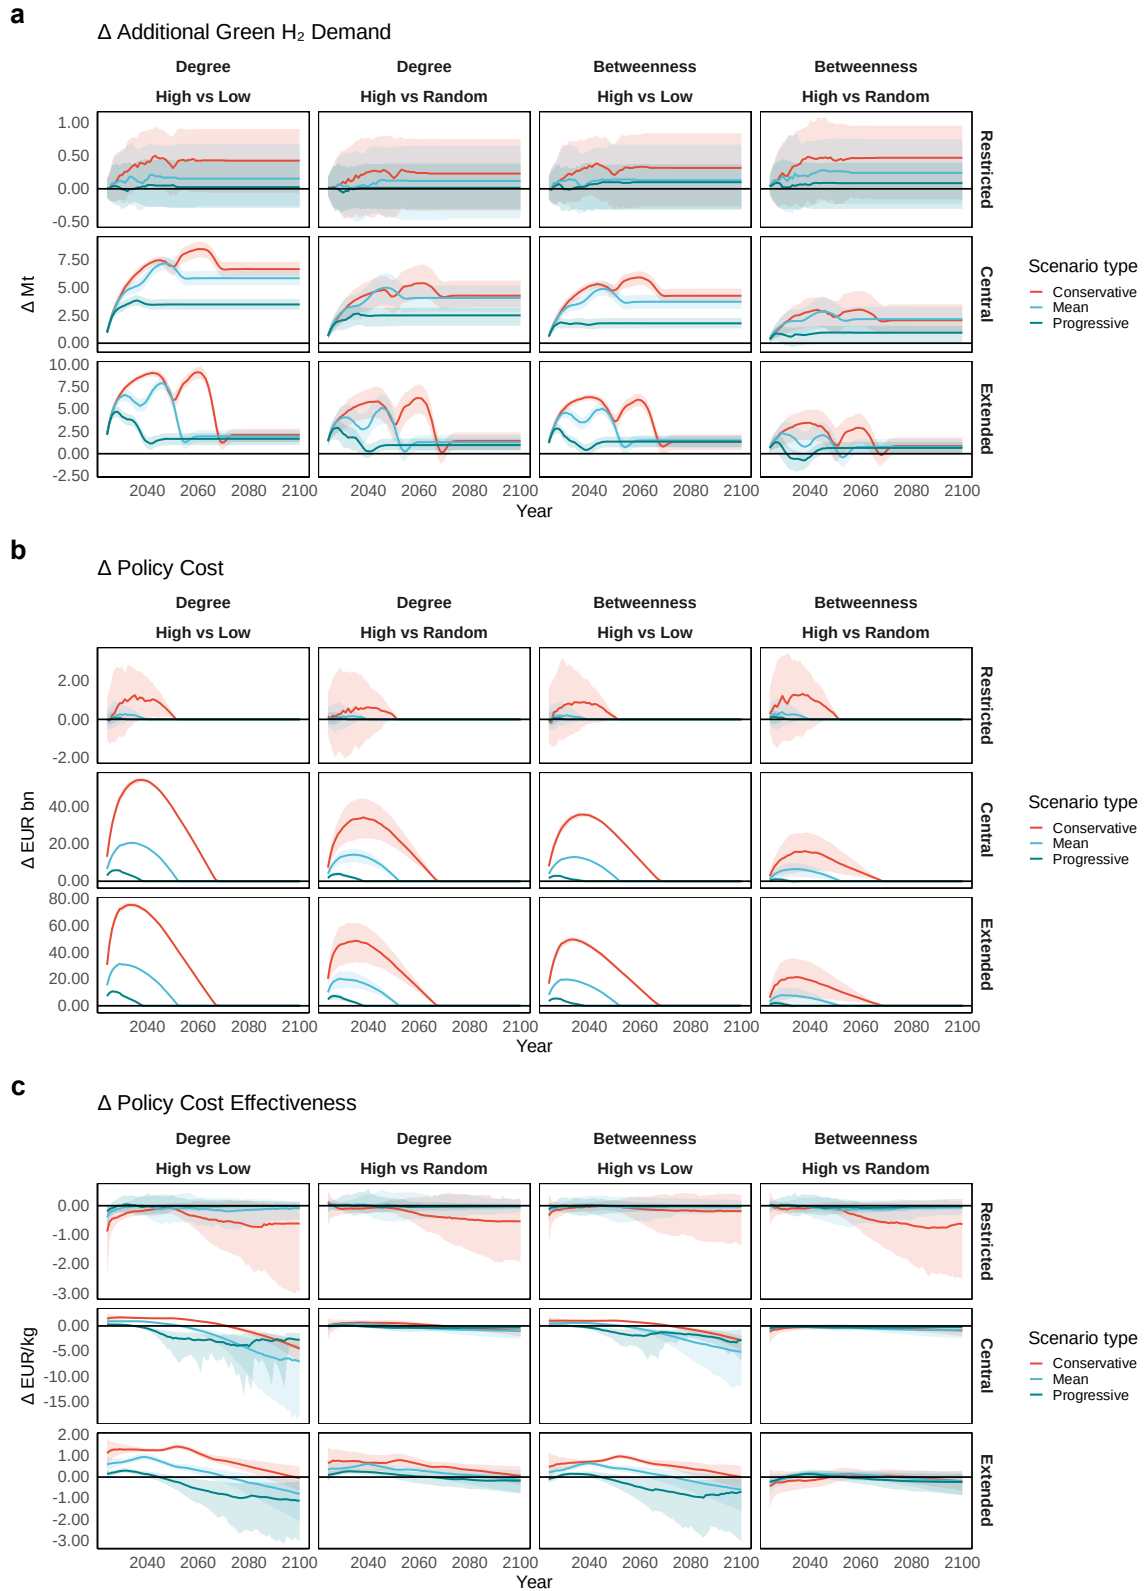

**Supplementary Figure 15 Expected green H<sub>2</sub> and cost effectiveness for demand-side policy interventions targeted on spatial spillover potential: Results for different baseline specifications.** Differences in policy outcomes between spatially-informed (high spillover potential or centrality) and spatially-neutral policy intervention (Cfd) controlling for sector, cost and size. Results are disaggregated by centrality metric and saturation scenario. Solid lines denote the median difference across 250 simulation runs for conservative (red line), mean (blue line) and progressive (green line) cost competitiveness scenario. Ribbons refer to the inter-quartile distance. **a** Difference in annual green H<sub>2</sub> demand (Mt). **b** Difference in annual policy cost (EURbn) over time. Policy cost is estimated as the difference between green H<sub>2</sub> (derivative) cost and incumbent fossil cost, and incurred when a targeted offtaker adopts. **c** Difference in policy cost effectiveness trajectories over time, measured as the ratio of cumulative policy cost to cumulative H<sub>2</sub> demand (EUR per kg H<sub>2</sub>)

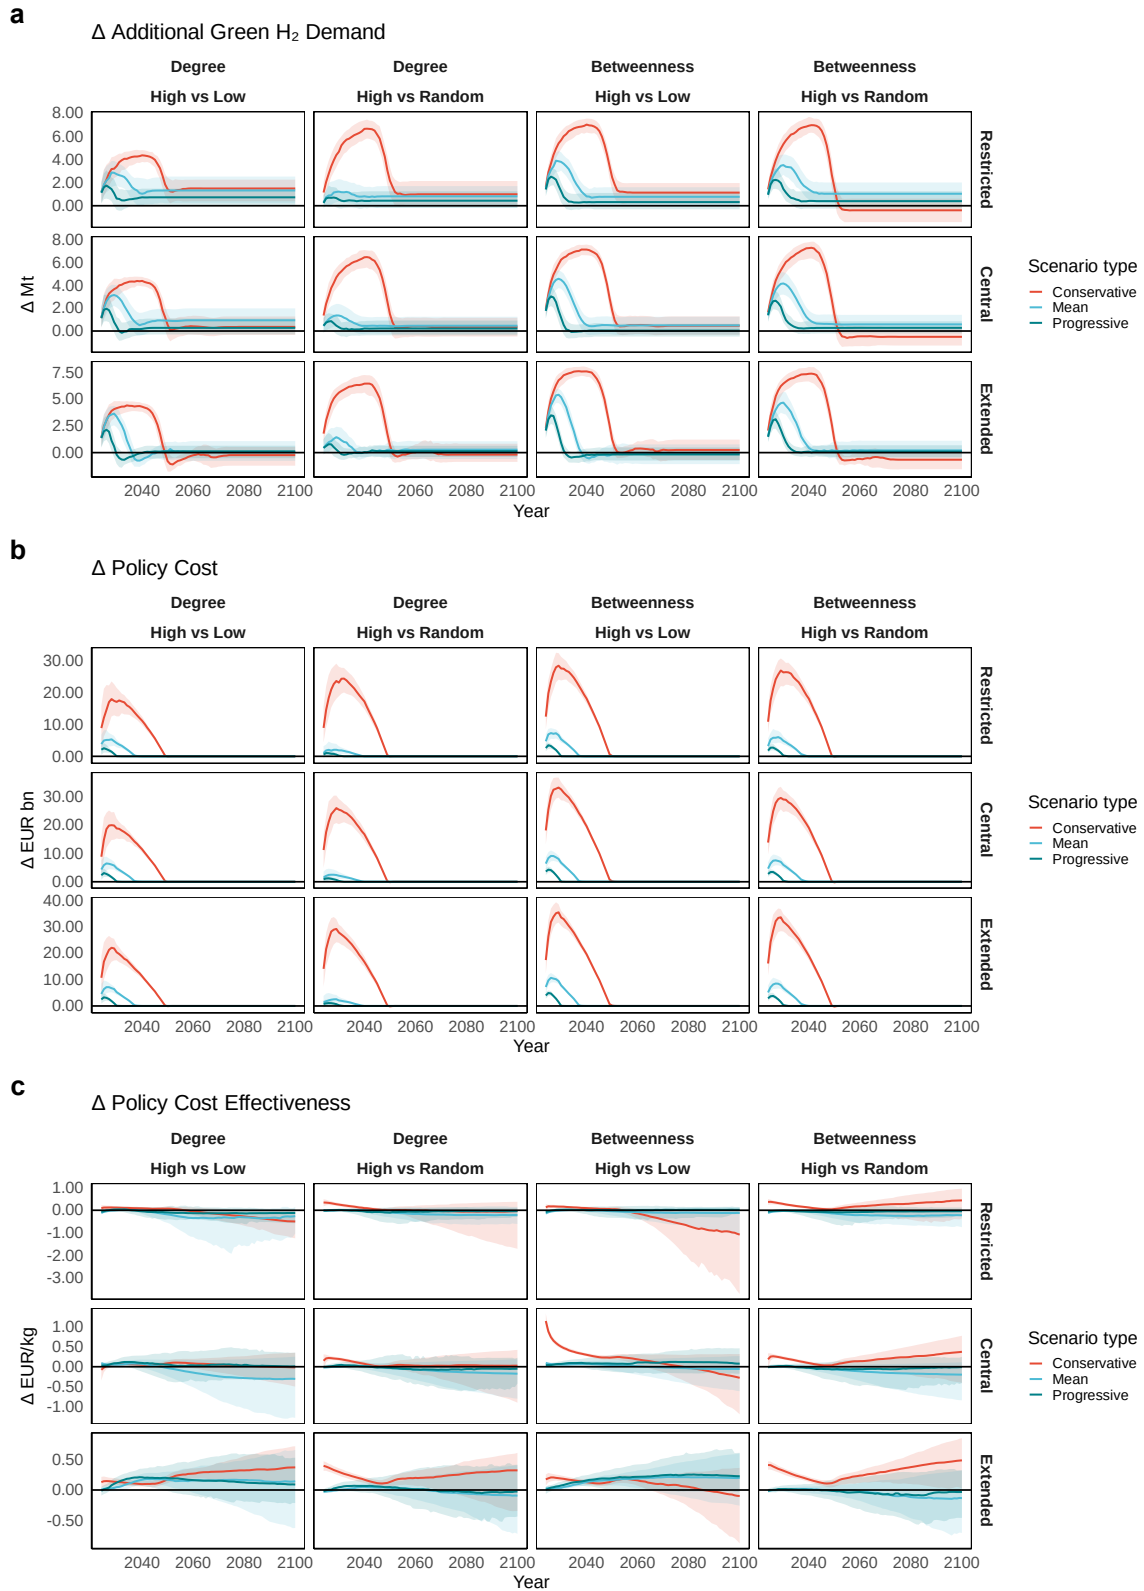

**Supplementary Figure 16 Expected green H<sub>2</sub> and cost effectiveness for demand-side policy interventions targeted on spatial spillover potential: Results for different baseline specifications.** Differences in policy outcomes between spatially-informed (high spillover potential or centrality) and spatially-neutral policy intervention (EHB-style auction setting). Results are disaggregated by centrality metric and saturation scenario. Solid lines denote the median difference across 250 simulation runs for conservative (red line), mean (blue line) and progressive (green line) cost competitiveness scenario. Ribbons refer to the inter-quartile distance. **a** Difference in annual green H<sub>2</sub> demand (Mt). **b** Difference in annual policy cost (EURbn) over time. Policy cost is estimated as the difference between green H<sub>2</sub> (derivative) cost and incumbent fossil cost, and incurred when a targeted offtaker adopts. **c** Difference in policy cost effectiveness trajectories over time, measured as the ratio of cumulative policy cost to cumulative H<sub>2</sub> demand (EUR per kg H<sub>2</sub>)

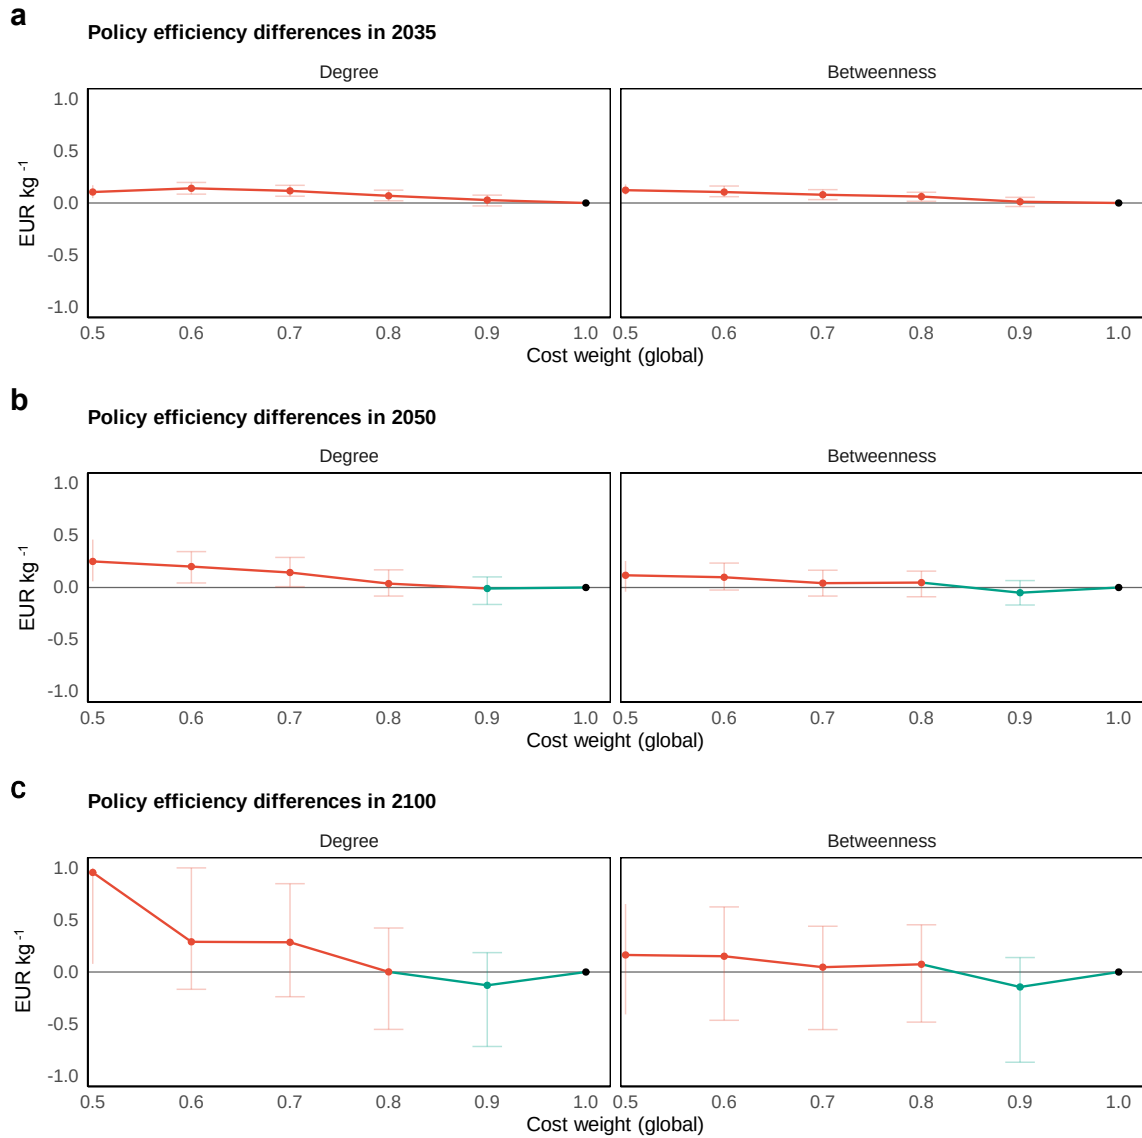

**Supplementary Figure 17 Policy efficiency differences in an EHB-style auction setting for different weight to the spatial spillover component** **a** Policy efficiency differences in 2030, disaggregated by centrality metric. Points show the median policy efficiency across 250 simulations, the error bars show the interquartile distance. **b** Policy efficiency differences for 2050. **c** Policy efficiency differences for the end of the simulation in 2100. Augmenting an EHB-style auction with a spatial spillover component can improve policy efficiency at moderate weights. At weights exceeding 20% (2100) the additional policy cost from targeting offtakers with unfavorable cost structure offsets the positive effect of spatial spillovers. Results also demonstrate the importance of policy commitment: Positive effects only materialize between 2030 and 2050.

## 3 Supplementary Note to Methods

### 3.1 SN9: Build-up of sectoral offtaker databases

#### Hard-to-abate industries

The database for hard-to-abate sectors includes industries that could use green H<sub>2</sub> as feedstock or for fuel and process heat in high temperature processes. We start from installations covered under the EU Emissions Trading System (EU ETS). The data is based on the latest available ETS registry data as per 31 December 2024, covering verified emissions and emissions allocation up to 2023.

Geographic coordinates for installations are generally determined using a hierarchical geocoding approach. We favor the open source OSM overpass API for geocoding, but use the Google Maps API when geocoding on the basis of installation names. Details per sector are provided below.

1. Installations are geocoded based on a combination of installation name, account holder name and country, using the Google Maps API. For this step, Google Maps is favored over the open source OSM overpass API due to greater availability of installation names and greater robustness towards diverging spellings. Note that the Google Maps API defaults to the country centroid if no information on installation and account holder name are available. To take this into account, all installations geocoded to the country centroid after this step are set again to missing value.
2. Installations that remain unresolved are geocoded based on combination of full address, city and country, using the OSM overpass API.
3. Installations that remain unresolved are geocoded based on combination of postal code, city and country, using the OSM overpass API.
4. Installations that remain unresolved are geocoded based on combination of city and country, using the OSM overpass API.
5. The remaining 35 unresolved installations are geocoded manually.

To check the geocoding’s robustness, the coordinates are matched with the coordinates included in Jan Abrell’s database for the European Transaction Log.<sup>137</sup> In 769 cases the distance between coordinates exceeds 20km, in 2099 10km. For these cases, the conflict is resolved through manual review. Adjusted coordinates are flagged as manual in the database.

Industry classification approaches vary widely between different databases. Each installation in the ETS registry includes an activity code. Additionally, a NACE Economic activity is added from Abrell’s database for the European Transaction Log.<sup>137</sup> The European Commission Directorate General for Climate Action’s emissions benchmark database again uses a diverging list of industries.<sup>138</sup> To ensure consistency, we match each NACE activity code to one or a set of industries included in the benchmark. We filter the database to include installations in the EU that are classified as active in the ETS registry and have a positive, non-zero carbon credit allocation in 2023. Under the EU ETS, a positive allocation indicates that an installation has verified activity levels and benchmarked emissions in the reference period. Installations with zero allocation typically fall into categories that are not relevant for H<sub>2</sub> adoption decisions in the period we study, such as facilities that are shut down, below allocation thresholds, temporarily inactive, or no longer producing benchmarked output. Including these sites would introduce locations that face no meaningful compliance or abatement incentives, thereby adding noise to the network analysis. Further, we exclude installations classified as “Maritime operator holding” or “Aircraft operator” via the ETS registry activity code, as emissions data for shipping and aviation is attributed to headquarters or registered offices of the operator, and are therefore not reflective of activity footprint at port and airport locations. Shipping and aviation sectors are covered separately in the data collection process. The ETS registry activity codes do not distinguish between combustion installations associated with industrial activity and combustion installations for the power generation sector. We therefore identify power generation installations through the NACE Economic activity classification “Power generation” and exclude them from the dataset. We cover the power sector separately in the data collection process.

1501 The EU ETS registry includes installation-level data for verified carbon emissions and carbon  
1502 credit allocations for the years 2017 to 2023. While carbon credits are allocated to individual installa-  
1503 tions based on production activity and a benchmark emissions factor, neither production activity nor  
1504 benchmark emissions factor are explicitly disclosed in the database. We estimate production activity  
1505 by dividing the carbon credit allocations for 2023 by the industry-level benchmark emissions factor.  
1506 The benchmark emissions factor is based on the European Commission Directorate General for Cli-  
1507 mate Action’s<sup>138</sup> update of benchmark values for the years 2021-2025 of phase for of the EU ETS.  
1508 The emissions factors are reported in Extended Data Table 5.

1509 We then estimate H<sub>2</sub>-specific energy consumption as the product of activity levels, and specific H<sub>2</sub>  
1510 energy consumption factors in terms of fuel and feedstock. The specific H<sub>2</sub> energy consumption factors  
1511 used in the calculation are reported in Extended Data Table 6. Factors are drawn from Neuwirth et  
1512 al,<sup>139</sup> Kiemel et al<sup>140</sup> and for some chemical subsectors, the IEA.<sup>141</sup> For some sectors, we aggregate  
1513 specific energy consumption factors, weighted by activity levels. Lower heating value of H<sub>2</sub> is drawn  
1514 from NREL.<sup>142</sup> Assumptions and sourcing are fully documented in the database.

## 1515 Aviation

1516 The aviation sector database includes aviation routes for passenger flights that either start or end  
1517 within the EU. Since cargo-only flights account for only 4% of the aviation sector’s emissions, we  
1518 omit them for simplicity.<sup>143</sup> We collect data on aviation routes and passenger numbers from country-  
1519 specific statistics collected by Eurostat.<sup>144</sup> Geographic coordinates for departure and arrival airports  
1520 are assigned using the Google Maps API. Coordinates are validated manually and missing coordi-  
1521 nates added. Manual interventions are flagged in the database. Distances for each aviation route are  
1522 calculated using the Haversine formula. Missing distances are imputed using mean distances for each  
1523 departure airport. In contrast to the industrial sector, H<sub>2</sub> is not used in its gaseous form, but needs  
1524 to be converted into e-kerosene before being used in an aircraft. In this paper, we take the simplifying  
1525 assumption that e-kerosene plants are collocated with airports, and H<sub>2</sub> demand consequently occurs  
1526 at the departure airport. We calculate passenger-kms by multiplying passenger numbers with the  
1527 route distances. To calculate H<sub>2</sub> energy consumption we use an estimate of 1.45 MJ per passenger-  
1528 km (0.01208 kg H<sub>2</sub> per passenger-km at lower heating value) from AirBP and Lufthansa reported by  
1529 Beck et al.<sup>145</sup>

## 1530 Shipping

1531 The shipping sector database includes maritime and inland waterway routes. We derive data for  
1532 maritime routes from country-specific statistics collected by Eurostat.<sup>146</sup> These records include port  
1533 level information for the departure port and country or region-level information for the arrival port.  
1534 We assume the arrival port to be the principal sea port in the respective country or region. We  
1535 subsequently merge the data into a combined dataset that includes data for all maritime routes that  
1536 either start or end within the EU, as well as 2023 tonnage numbers. Records with missing or ambiguous  
1537 information are excluded. Geographic coordinates for departure and arrival ports are assigned using  
1538 the Google Maps API. Coordinates are validated manually and missing coordinates added. Manual  
1539 interventions are flagged in the database. Distances for each aviation route are calculated using the  
1540 Haversine formula. Missing distances are imputed using mean distances for each departure port. Tkm  
1541 are calculated by multiplying tonnage by route distances, capped at 25,000 km to reflect limits on  
1542 tank capacity. The cap is calculated for Panamax carriers, assuming an average tank capacity of 1.75  
1543 million gallons, a daily consumption of 63 thousand gallons, and an average travel speed of 24 knots,  
1544 yielding an estimate of approximately 29,500 km.<sup>147</sup> We round this estimate down to 25,000km to to  
1545 be conservative and reflect the presence of vessels smaller than the Panamax. Data for inland waterway  
1546 routes is derived from two Eurostat datasets. We first draw tkm information on a NUTS-2 level.<sup>148</sup>  
1547 We then dis-aggregate this across ports, using total port handling volumes of inland ports.<sup>149</sup> For  
1548 the Netherlands, handling volumes are not reported on a port level; we therefore attribute handling  
1549 volumes to the principal port in each NUTS-2 region. For six further NUTS-2 regions reporting tkm  
1550 figures but no handling port we manually add the principal port in the respective NUTS-2 region for  
1551 use in the disaggregation.

1552 To calculate H<sub>2</sub>-specific energy consumption we use an estimate of 0.4 MJ per tkm (0.0033 kg H<sub>2</sub>  
1553 per tkm at lower heating value) from the German Environmental Agency reported by Beck et al.<sup>145</sup>

## 1554 **Heavy-duty transport**

1555 The heavy-duty transport database considers only potential H<sub>2</sub> demand from heavy-duty transport, as  
1556 other applications are expected to be decarbonized through alternative pathways, most prominently  
1557 through the use of battery electric vehicles.<sup>50</sup> We assume demand to occur at fuel stations within 10  
1558 kms of a major road. Fuel station and road networks in the EU are extracted using the OSM overpass  
1559 API. Heavy-duty vehicles are assumed to be likely to refuel in the vicinity of major road networks.  
1560 Accordingly, the sample of relevant fuel stations is reduced to stations that are within 10km of a  
1561 major road, tagged as “motorway” or “trunk”. The resulting dataset is filtered to remove duplicate  
1562 entries and retain unique records for each station. As fuel stations are extracted using the OSM  
1563 overpass API, they natively include coordinates. Note that for the purposes of the network analysis  
1564 and the simulation, heavy duty-offtakers are aggregated on a NUTS-3 level to avoid disproportionate  
1565 impact on the network structure. For this purpose, the “aggregated heavy-duty offtaker” is geo-  
1566 located at the fuel station closest to the centroid of the NUTS-3 region. As a basis for estimating  
1567 H<sub>2</sub>-specific energy consumption, road transport volumes in tkm are extracted from national road  
1568 transport statistics collected by Eurostat.<sup>150</sup> We then distribute tkms equally across fuel stations in  
1569 each country. To calculate H<sub>2</sub>-specific energy consumption we use an estimate of 0.0775 kg H<sub>2</sub> per km  
1570 reported by Beck et al,<sup>145</sup> based on the Hyundai XCIENT fuel cell truck.<sup>151</sup> The Hyundai XCIENT  
1571 reports maximum gross vehicle weight as 36t, with an empty vehicle weight of approximately 10t. The  
1572 European Commission’s report on emissions from new heavy-duty vehicles reports average payloads,  
1573 excluding vehicle weight, of long haul heavy-duty vehicles from approximately 7.5 to 14.5t. For our  
1574 calculations, we assume a gross vehicle weight of approximately 30t, which yields a H<sub>2</sub>-specific energy  
1575 consumption of 0.00258kg H<sub>2</sub> per tkm.

## 1576 **Power**

1577 We collect data on power plants, including capacity, curtailment, and geographic coordinates, from  
1578 the JRC Open Power Plants database.<sup>152</sup> We opt to use this dataset instead of the commercial  
1579 S&P Capital IQ dataset used for the empirical analysis to keep the offtaker database fully open  
1580 source and because for this purpose information on commissioning years is not required. The JRC  
1581 Open Power Plants database natively includes coordinates for power plants. The dataset is filtered to  
1582 include only natural gas plants located in Europe with valid geographic information. H<sub>2</sub>-specific energy  
1583 consumption is calculated based on plant capacity and energy output. H<sub>2</sub>-based power generation is  
1584 assumed to be limited to flexible “peaker” plants. To estimate energy output, availability is assumed  
1585 to be 90 percent, resulting in 7884 full load hours. Following the U.S. Government Accountability  
1586 Office’s definition of a peaker plant, the capacity factor is set to 15 percent.<sup>123</sup>

## 1587 **Heat**

1588 We collect data on residential heat consumption in GWh from the EU Hotmaps project<sup>153</sup> on a  
1589 NUTS-3 level, and convert it to kg H<sub>2</sub> at lower heating value. We then merge this dataset with  
1590 an open-source city location and population file.<sup>154</sup> City locations are extracted from Geonames,  
1591 an open-source city location and population file that natively includes coordinates.<sup>154</sup> Finally, we  
1592 disaggregate heat consumption to a city level based on population data. For computational feasibility,  
1593 we only consider cities with a population greater than 10,000 for our analysis.

## References

- 1594
- 1595 [1] European Commission. A hydrogen strategy for a climate-neutral europe (2020). URL <https://eur-lex.europa.eu/legal-content/EN/TXT/?uri=CELEX%3A52020DC0301>. Accessed: 2025-  
1596 09-30  
1597
- 1598 [2] IEA. Global hydrogen review 2024 (2024). URL [https://www.iea.org/reports/  
1599 global-hydrogen-review-2024/hydrogen-production](https://www.iea.org/reports/global-hydrogen-review-2024/hydrogen-production). Accessed: 2025-09-30
- 1600 [3] European Commission. European hydrogen bank (2025). URL [https://energy.ec.europa.eu/  
1601 topics/eus-energy-system/hydrogen/european-hydrogen-bank\\_en](https://energy.ec.europa.eu/topics/eus-energy-system/hydrogen/european-hydrogen-bank_en). Accessed: 2025-07-10
- 1602 [4] European Commission, Directorate-General for Climate Action. If25 hydro-  
1603 gen auction (2026). URL [https://cinea.ec.europa.eu/document/download/  
1604 923767e1-73a3-47c8-8ed6-510b80a1e7a3\\_en?filename=Q%26A\\_IF25Hydrogen.pdf](https://cinea.ec.europa.eu/document/download/923767e1-73a3-47c8-8ed6-510b80a1e7a3_en?filename=Q%26A_IF25Hydrogen.pdf). Accessed:  
1605 2026-02-10
- 1606 [5] Clean Hydrogen Partnership. Hydrogen valleys (2024). URL [https://www.clean-hydrogen.  
1607 europa.eu/get-involved/hydrogen-valleys\\_en](https://www.clean-hydrogen.europa.eu/get-involved/hydrogen-valleys_en). Accessed: 2026-02-10
- 1608 [6] European Commission, European Climate, Infrastructure, and Environment Executive Agency.  
1609 Calls - regular grants (2026). URL [https://cinea.ec.europa.eu/programmes/innovation-fund/  
1610 calls-regular-grants\\_en](https://cinea.ec.europa.eu/programmes/innovation-fund/calls-regular-grants_en). Accessed: 2026-02-10
- 1611 [7] European Commission. EU just transition platform (2025). URL [https://ec.europa.eu/regional-  
1612 policy/funding/just-transition-fund/just-transition-platform/about\\_en](https://ec.europa.eu/regional-policy/funding/just-transition-fund/just-transition-platform/about_en). Accessed: 2025-07-10
- 1613 [8] European Parliament and Council of the European Union. Regulation (EU) 2023/2405 of the  
1614 european parliament and of the council of 18 october 2023 on ensuring a level playing field  
1615 for sustainable air transport (ReFuelEU aviation) (text with EEA relevance) (2023). URL  
1616 <https://eur-lex.europa.eu/eli/reg/2023/2405/oj/eng>. Accessed: 2025-07-10
- 1617 [9] European Parliament and Council of European Union. Regulation (eu) 2023/1805 of the euro-  
1618 pean parliament and of the council of 13 september 2023 on the use of renewable and low-carbon  
1619 fuels in maritime transport, and amending directive 2009/16/ec (text with eea relevance) (2023).  
1620 URL <https://eur-lex.europa.eu/eli/reg/2023/1805/oj/eng>. Accessed: 2025-09-30
- 1621 [10] European Parliament and Council of the European Union. Directive (EU) 2023/2413 of the  
1622 european parliament and of the council of 18 october 2023 amending directive (EU) 2018/2001,  
1623 regulation (EU) 2018/1999 and directive 98/70/ec as regards the promotion of energy from  
1624 renewable sources, and repealing council directive (EU) 2015/652 (2023). URL [https://eur-lex.  
1625 europa.eu/eli/dir/2023/2413/oj/eng](https://eur-lex.europa.eu/eli/dir/2023/2413/oj/eng). Accessed: 2025-07-10
- 1626 [11] Clean Hydrogen Partnership. Ipcei hydrogen (2026). URL [https://ipcei.observatory.  
1627 clean-hydrogen.europa.eu/](https://ipcei.observatory.clean-hydrogen.europa.eu/). Accessed: 2025-02-10
- 1628 [12] European Commission. Law. Approved ipceis in the hydrogen value chain (2024). URL [https://  
1629 competition-policy.ec.europa.eu/state-aid/ipcei/approved-ipceis/hydrogen-value-chain\\_en](https://competition-policy.ec.europa.eu/state-aid/ipcei/approved-ipceis/hydrogen-value-chain_en).  
1630 Accessed: 2026-02-10
- 1631 [13] Bundesministerium für Wirtschaft und Energie. Co2-differenzverträge erklärt (2026). URL [https://  
1632 www.klimaschutzvertraege.info/thema/allgemeine\\_informationen\\_ksv](https://www.klimaschutzvertraege.info/thema/allgemeine_informationen_ksv). Accessed: 2026-02-10
- 1633 [14] H2 Global Stiftung. The h2 global mechanism (2025). URL [https://www.h2-global.org/  
1634 the-h2global-instrument](https://www.h2-global.org/the-h2global-instrument). Accessed: 2025-07-10
- 1635 [15] World Bank. Scaling hydrogen financing for development (2024). URL [https://documents1.  
1636 worldbank.org/curated/en/099022024121527489/pdf/P1809201780da10e518c061a2e73041a6fc.  
1637 pdf?utm](https://documents1.worldbank.org/curated/en/099022024121527489/pdf/P1809201780da10e518c061a2e73041a6fc.pdf?utm). Accessed: 2026-02-10

- 1638 [16] J. Burgess. European hydrogen industry digests failure of second eu auction (2026).  
 1639 URL [https://www.spglobal.com/energy/en/news-research/latest-news/energy-transition/](https://www.spglobal.com/energy/en/news-research/latest-news/energy-transition/012226-european-hydrogen-industry-digests-failure-of-second-eu-auction)  
 1640 [012226-european-hydrogen-industry-digests-failure-of-second-eu-auction](https://www.spglobal.com/energy/en/news-research/latest-news/energy-transition/012226-european-hydrogen-industry-digests-failure-of-second-eu-auction). Accessed:  
 1641 2026-02-10
- 1642 [17] M. Jansen, P. Beiter, I. Riepin, F. Müsgens, V.J. Guajardo-Fajardo, I. Staffell, B. Bulder,  
 1643 L. Kitzing, Policy choices and outcomes for offshore wind auctions globally. *Energy Policy* **167**,  
 1644 113000 (2022)
- 1645 [18] Wind Europe. The netherlands run another successful auction based  
 1646 on non-price criteria (2022). URL [https://windeurope.org/news/](https://windeurope.org/news/the-netherlands-run-another-successful-auction-based-on-non-price-criteria/)  
 1647 [the-netherlands-run-another-successful-auction-based-on-non-price-criteria/](https://windeurope.org/news/the-netherlands-run-another-successful-auction-based-on-non-price-criteria/). Accessed:  
 1648 2026-02-10
- 1649 [19] A. Grubler, C. Wilson, G. Nemet, Apples, oranges, and consistent comparisons of the temporal  
 1650 dynamics of energy transitions. *Energy research & social science* **22**, 18–25 (2016)
- 1651 [20] C. Wilson, Up-scaling, formative phases, and learning in the historical diffusion of energy  
 1652 technologies. *Energy Policy* **50**, 81–94 (2012)
- 1653 [21] T. Arvanitopoulos, C. Wilson, C. Morton, Decarbonising residential heating: local conditions  
 1654 and spatial spillovers driving heat pump uptake. *Energy Policy* **206**, 114787 (2025)
- 1655 [22] N.B. Irwin, Sunny days: Spatial spillovers in photovoltaic system adoptions. *Energy Policy* **151**,  
 1656 112192 (2021)
- 1657 [23] M. Graziano, K. Gillingham, Spatial patterns of solar photovoltaic system adoption: the influ-  
 1658 ence of neighbors and the built environment. *Journal of Economic Geography* **15**(4), 815–839  
 1659 (2015)
- 1660 [24] S. Losacker, J. Horbach, I. Liefner, Geography and the speed of green technology diffusion.  
 1661 *Industry and Innovation* **30**(5), 531–555 (2023)
- 1662 [25] B. Noll, B. Steffen, T.S. Schmidt, The effects of local interventions on global technological  
 1663 change through spillovers: A modeling framework and application to the road-freight sector.  
 1664 *Proceedings of the National Academy of Sciences* **121**(29), e2215684120 (2023)
- 1665 [26] S. Zhou, B.D. Solomon, M.A. Brown, The spillover effect of mandatory renewable portfolio  
 1666 standards. *Proceedings of the National Academy of Sciences* **121**(25), e2313193121 (2024)
- 1667 [27] A. Grübler, N. Nakićenović, D.G. Victor, Dynamics of energy technologies and global change.  
 1668 *Energy policy* **27**(5), 247–280 (1999)
- 1669 [28] M. Dejonghe, T. Van de Graaf, R. Belmans, From natural gas to hydrogen: Navigating import  
 1670 risks and dependencies in northwest europe. *Energy Research & Social Science* **106**, 103301  
 1671 (2023)
- 1672 [29] C. Doblinger, K. Surana, D. Li, N. Hultman, L.D. Anadón, How do global manufacturing shifts  
 1673 affect long-term clean energy innovation? a study of wind energy suppliers. *Research Policy*  
 1674 **51**(7), 104558 (2022)
- 1675 [30] K. Surana, C. Doblinger, L.D. Anadon, N. Hultman, Effects of technology complexity on the  
 1676 emergence and evolution of wind industry manufacturing locations along global value chains.  
 1677 *Nature Energy* **5**(10), 811–821 (2020)
- 1678 [31] J. Huenteler, J. Ossenbrink, T.S. Schmidt, V.H. Hoffmann, How a product’s design hierarchy  
 1679 shapes the evolution of technological knowledge—evidence from patent-citation networks in  
 1680 wind power. *Research Policy* **45**(6), 1195–1217 (2016)
- 1681 [32] R. Zhu, T. Ma, J. Feng, Diffusion of electric vehicles—the spillover effect of charging facilities and  
 1682 government demonstrations for neighbouring and peer regions. *Energy Economics* p. 109164

- 1683 (2026)
- 1684 [33] D. Fadly, F. Fontes, Geographical proximity and renewable energy diffusion: An empirical  
1685 approach. *Energy Policy* **129**, 422–435 (2019)
- 1686 [34] K. Luo, Y. Qiu, K. Surana, Network structure matters: how coordination and cooperation  
1687 mechanisms drive solar-battery co-adoption. *Environmental Research Letters* **21**(1), 014039  
1688 (2026)
- 1689 [35] C. Roberts, G. Nemet, Systematic historical analogue research for decision-making (SHARD):  
1690 Introducing a new methodology for using historical case studies to inform low-carbon transi-  
1691 tions. *Energy Research & Social Science* **93**, 102768 (2022)
- 1692 [36] A. Malhotra, T.S. Schmidt, Accelerating low-carbon innovation. *Joule* **4**(11), 2259–2267 (2020)
- 1693 [37] N. Mac Dowell, N. Sunny, N. Brandon, H. Herzog, A.Y. Ku, W. Maas, A. Ramirez, D.M.  
1694 Reiner, G.N. Sant, N. Shah, The hydrogen economy: A pragmatic path forward. *Joule* **5**(10),  
1695 2524–2529 (2021)
- 1696 [38] F. Kourougianni, A. Arsalis, A.V. Olympios, G. Yiasoumas, C. Konstantinou, P. Papanastasiou,  
1697 G.E. Georghiou, A comprehensive review of green hydrogen energy systems. *Renewable Energy*  
1698 p. 120911 (2024)
- 1699 [39] F. Neumann, E. Zeyen, M. Victoria, T. Brown, The potential role of a hydrogen network in  
1700 europe. *Joule* **7**(8), 1793–1817 (2023)
- 1701 [40] B.C. Erdener, B. Sergi, O.J. Guerra, A.L. Chueca, K. Pambour, C. Brancucci, B.M. Hodge,  
1702 A review of technical and regulatory limits for hydrogen blending in natural gas pipelines.  
1703 *International Journal of Hydrogen Energy* **48**(14), 5595–5617 (2023)
- 1704 [41] K. Topolski, E.P. Reznicek, B.C. Erdener, C.W. San Marchi, J.A. Ronevich, L. Fring, K. Sim-  
1705 mons, O.J.G. Fernandez, B.M. Hodge, M. Chung, Hydrogen blending into natural gas pipeline  
1706 infrastructure: Review of the state of technology. Tech. rep., National Renewable Energy  
1707 Laboratory (2022). URL <https://www.osti.gov/biblio/1893355>. Accessed: 2025-09-30
- 1708 [42] A. Odenweller, F. Ueckerdt, The green hydrogen ambition and implementation gap. *Nature*  
1709 *Energy* **10**(1), 1–14 (2025)
- 1710 [43] F. Ueckerdt, P.C. Verpoort, R. Anantharaman, C. Bauer, F. Beck, T. Longden, S. Roussanaly,  
1711 On the cost competitiveness of blue and green hydrogen. *Joule* **8**(1), 104–128 (2024)
- 1712 [44] Liebreich, Michael. Liebreich: Clean hydrogen’s missing trillions (2023). URL [https://about.  
1713 bnef.com/blog/liebreich-clean-hydrogens-missing-trillions/](https://about.bnef.com/blog/liebreich-clean-hydrogens-missing-trillions/). Accessed: 2025-09-30
- 1714 [45] A. Ason, J. Dal Poz. Contracts for difference: The instrument of choice for the energy  
1715 transition (2024). URL [https://www.oxfordenergy.org/wpcms/wp-content/uploads/2024/03/  
1716 Contracts-for-difference.pdf](https://www.oxfordenergy.org/wpcms/wp-content/uploads/2024/03/Contracts-for-difference.pdf). Accessed: 2025-09-30
- 1717 [46] European Commission. Hydrogen valleys facility (tender no. cleanh2/2024/op/0002) (2024).  
1718 URL [https://ec.europa.eu/info/funding-tenders/opportunities/portal/screen/opportunities/  
1719 tender-details/424246ca-5b16-41b0-8bd0-355c769a396a-CN](https://ec.europa.eu/info/funding-tenders/opportunities/portal/screen/opportunities/tender-details/424246ca-5b16-41b0-8bd0-355c769a396a-CN). Accessed: 2025-07-10
- 1720 [47] European Commission. Commission Delegated Regulation (EU) 2023/1184 of 10 February  
1721 2023 supplementing directive (eu) 2018/2001 of the european parliament and of the council  
1722 by establishing a union methodology setting out detailed rules for the production of renewable  
1723 liquid and gaseous transport fuels of non-biological origins (2023). URL [https://eur-lex.europa.  
1724 eu/legal-content/EN/TXT/?uri=CELEX%3A32023R1184](https://eur-lex.europa.eu/legal-content/EN/TXT/?uri=CELEX%3A32023R1184). Accessed: 2025-09-30
- 1725 [48] N. Farrell, Policy design for green hydrogen. *Renewable and Sustainable Energy Reviews* **178**,  
1726 113216 (2023)

- 1727 [49] J. Rosenow, Is heating homes with hydrogen all but a pipe dream? an evidence review. *Joule*  
1728 **6**(10), 2225–2228 (2022)
- 1729 [50] T.J. Wallington, M. Woody, G.M. Lewis, G.A. Keoleian, E.J. Adler, J.R.R.A. Martins, M.D.  
1730 Collette, Green hydrogen pathways, energy efficiencies, and intensities for ground, air, and  
1731 marine transportation. *Joule* **8**(8), 2190–2207 (2024)
- 1732 [51] G. Nemet, J. Greene, F. Müller-Hansen, J.C. Minx, Dataset on the adoption of historical tech-  
1733 nologies informs the scale-up of emerging carbon dioxide removal measures. *Communications*  
1734 *Earth & Environment* **4**(1), 397 (2023)
- 1735 [52] A. Odenweller, F. Ueckerdt, G.F. Nemet, M. Jensterle, G. Luderer, Probabilistic feasibility  
1736 space of scaling up green hydrogen supply. *Nature Energy* **7**(9), 854–865 (2022)
- 1737 [53] P.J. Heptonstall, R.J.K. Gross, A systematic review of the costs and impacts of integrating  
1738 variable renewables into power grids. *Nature Energy* **6**(1), 72–83 (2021)
- 1739 [54] W. Gorman, J.M. Kemp, J. Rand, J. Seel, R. Wisner, N. Manderlink, F. Kahrl, K. Porter,  
1740 W. Cotton, Grid connection barriers to renewable energy deployment in the united states. *Joule*  
1741 **9**(2) (2025)
- 1742 [55] R. Way, M.C. Ives, P. Mealy, J.D. Farmer, Empirically grounded technology forecasts and the  
1743 energy transition. *Joule* **6**(9), 2057–2082 (2022)
- 1744 [56] European Commission. Report from the commission to the european parliament, the council,  
1745 the european economic and social committee and the committee of the regions: 2024 report  
1746 on energy subsidies in the EU (2024). URL [https://eur-lex.europa.eu/legal-content/EN/TXT/  
1747 ?uri=COM:2025:17:FIN](https://eur-lex.europa.eu/legal-content/EN/TXT/?uri=COM:2025:17:FIN). Accessed: 2025-09-30
- 1748 [57] N. Apergis, H. Fahmy, Geopolitical risk and energy price crash risk. *Energy Economics* **140**,  
1749 107975 (2024)
- 1750 [58] T. Van de Graaf, I. Overland, D. Scholten, K. Westphal, The new oil? the geopolitics and  
1751 international governance of hydrogen. *Energy Research & Social Science* **70**, 101667 (2020)
- 1752 [59] S. Yu, Y. Fan, Z. Shi, J. Li, X. Zhao, T. Zhang, Z. Chang, Hydrogen-based combined heat and  
1753 power systems: A review of technologies and challenges. *International Journal of Hydrogen*  
1754 *Energy* **48**(89), 34906–34929 (2023)
- 1755 [60] J.A. Kuiper, V.C. Tidwell, A.B. Orr, J.J. Quinn, K. Quinter, V. Koritarov, D.A. Ladner,  
1756 Modeling power plant siting opportunities and constraints in the eastern interconnection. Tech.  
1757 rep., Argonne National Laboratory (ANL), Argonne, IL (United States) (2022). [https://doi.  
1758 org/10.2172/1861485](https://doi.org/10.2172/1861485). URL <https://www.osti.gov/biblio/1861485>
- 1759 [61] J.P. Jimenez-Navarro, K. Kavvadias, F. Filippidou, M. Pavičević, S. Quoilin, Coupling the  
1760 heating and power sectors: The role of centralised combined heat and power plants and district  
1761 heat in a european decarbonised power system. *Applied Energy* **270**, 115134 (2020)
- 1762 [62] IEA. Cogeneration and renewables (2011). URL [https://iea.blob.  
1763 core.windows.net/assets/f88eee81-deba-4abf-9fb8-34ba2b8cb9d6/CoGeneration\\_  
1764 RenewablesSolutionsforaLowCarbonEnergyFuture.pdf](https://iea.blob.core.windows.net/assets/f88eee81-deba-4abf-9fb8-34ba2b8cb9d6/CoGeneration_RenewablesSolutionsforaLowCarbonEnergyFuture.pdf). Accessed: 2026-02-10
- 1765 [63] IEA. Cogeneration and district energy (2009). URL [https://iea.blob.core.windows.net/assets/  
1766 5c02850f-e951-4f4b-abae-f55cc29275f8/CogenerationandDistrictEnergy.pdf](https://iea.blob.core.windows.net/assets/5c02850f-e951-4f4b-abae-f55cc29275f8/CogenerationandDistrictEnergy.pdf). Accessed: 2026-02-  
1767 10
- 1768 [64] A. Abuzayed, M. Liebensteiner, N. Hartmann, Hydrogen-ready power plants: Optimizing  
1769 pathways to a decarbonized energy system in germany. *Applied Energy* **395**, 126228 (2025)
- 1770 [65] M.R. Edwards, Z.H. Thomas, G.F. Nemet, S. Rathod, J. Greene, K. Surana, K.M. Kennedy,  
1771 J. Fuhrman, H.C. McJeon, Modeling direct air carbon capture and storage in a 1.5°C climate

- 1772 future using historical analogs. *Proceedings of the National Academy of Sciences* **121**(20),  
1773 e2215679121 (2024)
- 1774 [66] E.M. Rogers, *Diffusion of Innovations* (Free Press, New York, 1963)
- 1775 [67] M. Hobday, The project-based organisation: an ideal form for managing complex products and  
1776 systems? *Research policy* **29**(7-8), 871–893 (2000)
- 1777 [68] E. Von Hippel, “sticky information” and the locus of problem solving: implications for  
1778 innovation. *Management science* **40**(4), 429–439 (1994)
- 1779 [69] Rolls Royce. Our businesses) (2026). URL [https://www.rolls-royce.com/about/our-businesses.](https://www.rolls-royce.com/about/our-businesses.aspx)  
1780 [aspx](https://www.rolls-royce.com/about/our-businesses.aspx). Accessed: 2026-02-10
- 1781 [70] GE Vernova. Businesses) (2026). URL <https://www.governova.com/>. Accessed: 2026-02-10
- 1782 [71] European Commission – Joint Research Centre. General equilibrium model – economy, energy,  
1783 environment (GEM-E3) (2024). URL [https://web.jrc.ec.europa.eu/policy-model-inventory/](https://web.jrc.ec.europa.eu/policy-model-inventory/explore/models/model-gem-e3/)  
1784 [explore/models/model-gem-e3/](https://web.jrc.ec.europa.eu/policy-model-inventory/explore/models/model-gem-e3/). Accessed: 2025-01-10
- 1785 [72] L. Davis, C. Hausman, Market impacts of a nuclear power plant closure. *American Economic*  
1786 *Journal: Applied Economics* **8**(2), 92–122 (2016)
- 1787 [73] M. Ram, M. Child, A. Aghahosseini, D. Bogdanov, A. Lohrmann, C. Breyer, A comparative  
1788 analysis of electricity generation costs from renewable, fossil fuel and nuclear sources in g20  
1789 countries for the period 2015-2030. *Journal of cleaner production* **199**, 687–704 (2018)
- 1790 [74] K.Y. Liang, S.L. Zeger, Longitudinal data analysis using generalized linear models. *Biometrika*  
1791 **73**(1), 13–22 (1986)
- 1792 [75] J. Sitarz, M. Pahle, S. Osorio, G. Luderer, R. Pietzcker, EU carbon prices signal high policy  
1793 credibility and farsighted actors. *Nature Energy* **9**(6), 691–702 (2024)
- 1794 [76] J. Ling, H. Yang, G. Tian, J. Cheng, X. Wang, X. Yu, Direct reduction of iron to facilitate net-  
1795 zero emissions in the steel industry: A review of research progress at different scales. *Journal*  
1796 *of Cleaner Production* **441**, 140933 (2024)
- 1797 [77] D.R. Nhuchhen, S.P. Sit, D.B. Layzell, Alternative fuels co-fired with natural gas in the pre-  
1798 calciner of a cement plant: Energy and material flows. *Fuel* **295**, 120544 (2021)
- 1799 [78] Danish National Energy Agency. Technology data for industrial process heat (2026). URL  
1800 <https://ens.dk/en/analyses-and-statistics/technology-data-industrial-process-heat>. Accessed:  
1801 2026-02-10
- 1802 [79] R.M.L. Novaes, M.M.R. Moreira, S.M. Arantes, L.C. Bachion, T.A.D. Hernandez, Dealing with  
1803 the iluc risk of biofuel production for the energy transition. *Energy Policy* **210**, 115035 (2026)
- 1804 [80] J. Fargione, J. Hill, D. Tilman, S. Polasky, P. Hawthorne, Land clearing and the biofuel carbon  
1805 debt. *Science* **319**(5867), 1235–1238 (2008)
- 1806 [81] L. Dray, A.W. Schäfer, C. Grobler, C. Falter, F. Allroggen, M.E. Stettler, S.R. Barrett, Cost  
1807 and emissions pathways towards net-zero climate impacts in aviation. *Nature Climate Change*  
1808 **12**(10), 956–962 (2022)
- 1809 [82] J. Holladay, Z. Abdullah, J. Heyne, Sustainable aviation fuel: Review of technical pathways.  
1810 Tech. rep., USDOE Office of Energy Efficiency and Renewable Energy (EERE) (2020)
- 1811 [83] D.R. Vardon, B.J. Sherbacow, K. Guan, J.S. Heyne, Z. Abdullah, Realizing “net-zero-carbon”  
1812 sustainable aviation fuel. *Joule* **6**(1), 16–21 (2022)

- 1813 [84] S. van Ewijk, W. McDowall, Diffusion of flue gas desulfurization reveals barriers and opportu-  
1814 nities for carbon capture and storage. *Nature Communications* **11**(1), 4298 (2020)
- 1815 [85] IEA. Net zero roadmap: A global pathway to keep the 1.5 °c goal in reach. (2023).  
1816 URL [https://iea.blob.core.windows.net/assets/8ad619b9-17aa-473d-8a2f-4b90846f5c19/](https://iea.blob.core.windows.net/assets/8ad619b9-17aa-473d-8a2f-4b90846f5c19/NetZeroRoadmap_AGlobalPathwaytoKeepthe1.5CGoalinReach-2023Update.pdf)  
1817 [NetZeroRoadmap\\_AGlobalPathwaytoKeepthe1.5CGoalinReach-2023Update.pdf](https://iea.blob.core.windows.net/assets/8ad619b9-17aa-473d-8a2f-4b90846f5c19/NetZeroRoadmap_AGlobalPathwaytoKeepthe1.5CGoalinReach-2023Update.pdf). Accessed:  
1818 2026-02-10
- 1819 [86] A. Gailani, S. Cooper, S. Allen, A. Pimm, P. Taylor, R. Gross, Assessing the potential of  
1820 decarbonization options for industrial sectors. *Joule* **8**(3), 576–603 (2024)
- 1821 [87] C.M. Woodall, Z. Fan, Y. Lou, A. Bhardwaj, A. Khatri, M. Agrawal, C.F. McCormick, S.J.  
1822 Friedmann, Technology options and policy design to facilitate decarbonization of chemical  
1823 manufacturing. *Joule* **6**(11), 2474–2499 (2022)
- 1824 [88] IEA. Technology roadmap - energy and ghg reductions in the  
1825 chemical industry via catalytic processes (2013). URL [https://](https://iea.blob.core.windows.net/assets/d0f7ff3a-0612-422d-ad7d-a682091cb500/TechnologyRoadmapEnergyandGHGReductionsInTheChemicalIndustryviaCatalyticProcesses.pdf)  
1826 [iea.blob.core.windows.net/assets/d0f7ff3a-0612-422d-ad7d-a682091cb500/](https://iea.blob.core.windows.net/assets/d0f7ff3a-0612-422d-ad7d-a682091cb500/TechnologyRoadmapEnergyandGHGReductionsInTheChemicalIndustryviaCatalyticProcesses.pdf)  
1827 [TechnologyRoadmapEnergyandGHGReductionsInTheChemicalIndustryviaCatalyticProcesses.](https://iea.blob.core.windows.net/assets/d0f7ff3a-0612-422d-ad7d-a682091cb500/TechnologyRoadmapEnergyandGHGReductionsInTheChemicalIndustryviaCatalyticProcesses.pdf)  
1828 [pdf](https://iea.blob.core.windows.net/assets/d0f7ff3a-0612-422d-ad7d-a682091cb500/TechnologyRoadmapEnergyandGHGReductionsInTheChemicalIndustryviaCatalyticProcesses.pdf). Accessed: 2026-02-10
- 1829 [89] P. Gabrielli, L. Rosa, M. Gazzani, R. Meys, A. Bardow, M. Mazzotti, G. Sansavini, Net-zero  
1830 emissions chemical industry in a world of limited resources. *One Earth* **6**(6), 682–704 (2023)
- 1831 [90] D.S. Mallapragada, Y. Dvorkin, M.A. Modestino, D.V. Esposito, W.A. Smith, B.M. Hodge,  
1832 M.P. Harold, V.M. Donnelly, A. Nuz, C. Bloomquist, et al., Decarbonization of the chemical  
1833 industry through electrification: Barriers and opportunities. *Joule* **7**(1), 23–41 (2023)
- 1834 [91] T. Cordero-Lanzac, A.G. Gayubo, A.T. Aguayo, J. Bilbao, The mto and dto processes as  
1835 greener alternatives to produce olefins: A review of kinetic models and reactor design. *Chemical*  
1836 *Engineering Journal* **494**, 152906 (2024)
- 1837 [92] Methanol Institute. Production of methanol worldwide from 2017 to 2022 (in mil-  
1838 lion metric tons). Statista (2022). URL [https://www.statista.com/statistics/1323406/](https://www.statista.com/statistics/1323406/methanol-production-worldwide/)  
1839 [methanol-production-worldwide/](https://www.statista.com/statistics/1323406/methanol-production-worldwide/). Graph. Retrieved March 11, 2026
- 1840 [93] Methanol Market Services Asia (MMSA). Distribution of methanol supply worldwide  
1841 in 2020, by region. Statista (2021). URL [https://www.statista.com/statistics/1323622/](https://www.statista.com/statistics/1323622/distribution-of-methanol-supply-worldwide-by-region/)  
1842 [distribution-of-methanol-supply-worldwide-by-region/](https://www.statista.com/statistics/1323622/distribution-of-methanol-supply-worldwide-by-region/). Graph. Retrieved March 11, 2026
- 1843 [94] M. Rumayor, A. Dominguez-Ramos, A. Irabien, Toward the decarbonization of hard-to-abate  
1844 sectors: a case study of the soda ash production. *ACS Sustainable Chemistry & Engineering*  
1845 **8**(32), 11956–11966 (2020)
- 1846 [95] M. Maslin, L. Van Heerde, S. Day, Sulfur: A potential resource crisis that could stifle green  
1847 technology and threaten food security as the world decarbonises. *The Geographical Journal*  
1848 **188**(4), 498–505 (2022)
- 1849 [96] S.J. Faucher, M.R. Shaner, S.T. Omelchenko, G. Anikeeva, I.S. McKay, Gypsum as a feedstock  
1850 for low-cost, decarbonized portland cement and sulfuric acid. *ACS Sustainable Chemistry &*  
1851 *Engineering* **13**(11), 4290–4301 (2025)
- 1852 [97] F. Rosner, T. Bhagde, D.S. Slaughter, V. Zorba, J. Stokes-Draut, Techno-economic and carbon  
1853 dioxide emission assessment of carbon black production. *Journal of Cleaner Production* **436**,  
1854 140224 (2024)
- 1855 [98] A. Levesque, S. Osorio, S. Herkel, M. Pahle, Rethinking the role of efficiency for the  
1856 decarbonization of buildings is essential. *Joule* **7**(6), 1087–1092 (2023)

- 1857 [99] IEA. Heating (2026). URL [https://www.iea.org/energy-system/buildings/heating#](https://www.iea.org/energy-system/buildings/heating#home-heating-technologies)  
1858 [home-heating-technologies](https://www.iea.org/energy-system/buildings/heating#home-heating-technologies). Accessed: 2026-02-10
- 1859 [100] J. Rosenow, A meta-review of 54 studies on hydrogen heating. *Cell Reports Sustainability* **1**(1)  
1860 (2024)
- 1861 [101] H. Lund, P.A. Østergaard, P. Sorknæs, S. Nielsen, I.R. Skov, M. Yuan, J.Z. Thellufsen, B.V.  
1862 Mathiesen, S.M. Benson, A. Jentsch, et al., District heating in clean energy systems. *Nature*  
1863 *Reviews Clean Technology* **1**(8), 532–546 (2025)
- 1864 [102] V. Soltero, R. Chacartegui, C. Ortiz, R. Velázquez, Potential of biomass district heating systems  
1865 in rural areas. *Energy* **156**, 132–143 (2018)
- 1866 [103] P. Plötz, Hydrogen technology is unlikely to play a major role in sustainable road transport.  
1867 *Nature electronics* **5**(1), 8–10 (2022)
- 1868 [104] B. Nykvist, O. Olsson, The feasibility of heavy battery electric trucks. *Joule* **5**(4), 901–913  
1869 (2021)
- 1870 [105] M. Bampaou, K.D. Panopoulos, An overview of hydrogen valleys: Current status, challenges,  
1871 and their role in increased renewable energy penetration. *Renewable and Sustainable Energy*  
1872 *Reviews* **207**, 114923 (2025)
- 1873 [106] T. Verger, U. Azimov, O. Adeniyi, Biomass-based fuel blends as an alternative for the future  
1874 heavy-duty transport: A review. *Renewable and Sustainable Energy Reviews* **161**, 112391 (2022)
- 1875 [107] X. Wu, J. Meng, X. Liang, L. Sun, D. Coffman, A. Kontoleon, D. Guan, Technological pathways  
1876 for cost-effective steel decarbonization. *Nature* pp. 1–9 (2025)
- 1877 [108] Z. Fan, S.J. Friedmann, Low-carbon production of iron and steel: Technology options, economic  
1878 assessment, and policy. *Joule* **5**(4), 829–862 (2021)
- 1879 [109] W. Kim, I. Sohn, Critical challenges facing low carbon steelmaking technology using hydrogen  
1880 direct reduced iron. *Joule* **6**(10), 2228–2232 (2022)
- 1881 [110] LeadIT. Green steel tracker. leadership group for industry transition (2025). URL [https://www.](https://www.industrytransition.org/trackers/green-steel-tracker/download-green-steel-dataset/)  
1882 [industrytransition.org/trackers/green-steel-tracker/download-green-steel-dataset/](https://www.industrytransition.org/trackers/green-steel-tracker/download-green-steel-dataset/). Accessed:  
1883 2026-02-10
- 1884 [111] Bloomberg New Energy Finance. Scaling up hydrogen. the case for low-  
1885 carbon steel (2024). URL [https://assets.bbhub.io/media/sites/25/2024/01/](https://assets.bbhub.io/media/sites/25/2024/01/Scaling-Up-Hydrogen-The-Case-For-Low-Carbon-Steel-Bloomberg-New-Economy.pdf)  
1886 [Scaling-Up-Hydrogen-The-Case-For-Low-Carbon-Steel-Bloomberg-New-Economy.pdf](https://assets.bbhub.io/media/sites/25/2024/01/Scaling-Up-Hydrogen-The-Case-For-Low-Carbon-Steel-Bloomberg-New-Economy.pdf).  
1887 Accessed: 2026-02-10
- 1888 [112] IEA. Steel (2026). URL <https://www.iea.org/energy-system/industry/steel>. Accessed: 2026-  
1889 02-10
- 1890 [113] L. Zore. Decarbonization options for the aluminium industry (2024). URL [https://publications.](https://publications.jrc.ec.europa.eu/repository/handle/JRC136525)  
1891 [jrc.ec.europa.eu/repository/handle/JRC136525](https://publications.jrc.ec.europa.eu/repository/handle/JRC136525). Accessed: 2026-02-10
- 1892 [114] F.T. Röben, N. Schöne, U. Bau, M.A. Reuter, M. Dahmen, A. Bardow, Decarbonizing copper  
1893 production by power-to-hydrogen: A techno-economic analysis. *Journal of Cleaner Production*  
1894 **306**, 127191 (2021)
- 1895 [115] G. Clark, M. Davis, A. Kumar, The development of a framework to compare carbon capture  
1896 and storage technologies as a means of decarbonizing cement production. *Renewable and*  
1897 *Sustainable Energy Reviews* **214**, 115556 (2025)
- 1898 [116] Cermaneunie. Ceramic roadmap to 2050 (2021). URL [https://www.cerameunie.eu/media/](https://www.cerameunie.eu/media/zyqdwvwp/ceramic-roadmap-to-2050.pdf)  
1899 [zyqdwvwp/ceramic-roadmap-to-2050.pdf](https://www.cerameunie.eu/media/zyqdwvwp/ceramic-roadmap-to-2050.pdf). Accessed: 2026-02-10

- 1900 [117] M. Zier, P. Stenzel, L. Kotzur, D. Stolten, A review of decarbonization options for the glass  
1901 industry. *Energy Conversion and Management: X* **10**, 100083 (2021)
- 1902 [118] A. Giampieri, J. Ling-Chin, Z. Ma, A. Smallbone, A. Roskilly, A review of the current auto-  
1903 motive manufacturing practice from an energy perspective. *Applied Energy* **261**, 114074  
1904 (2020)
- 1905 [119] CEFS. Cefs climate neutrality toolbox (2023). URL [https://cefs.org/wp-content/uploads/  
1906 2023/06/CEFS-Climate-Neutrality-Toolbox-2.pdf](https://cefs.org/wp-content/uploads/2023/06/CEFS-Climate-Neutrality-Toolbox-2.pdf). Accessed: 2026-02-10
- 1907 [120] S.J. Davis, N.S. Lewis, M. Shaner, S. Aggarwal, D. Arent, I.L. Azevedo, S.M. Benson,  
1908 T. Bradley, J. Brouwer, Y.M. Chiang, et al., Net-zero emissions energy systems. *Science*  
1909 **360**(6396), eaas9793 (2018)
- 1910 [121] J.E. Bistline, G.J. Blanford, The role of the power sector in net-zero energy systems. *Energy*  
1911 and *Climate Change* **2**, 100045 (2021)
- 1912 [122] K. Oshiro, S. Fujimori, Limited impact of hydrogen co-firing on prolonging fossil-based power  
1913 generation under low emissions scenarios. *Nature Communications* **15**(1), 1778 (2024)
- 1914 [123] U.S. Government Accountability Office. Electricity: Information on peak demand power plants  
1915 (2024). URL <https://www.gao.gov/assets/gao-24-106145.pdf>. Accessed: 2025-01-10
- 1916 [124] IEA. Managing the seasonal variability of electricity demand and supply (2024). URL [https://  
1917 www.iea.org/reports/managing-the-seasonal-variability-of-electricity-demand-and-supply](https://www.iea.org/reports/managing-the-seasonal-variability-of-electricity-demand-and-supply).  
1918 Accessed: 2026-02-10
- 1919 [125] S. Ingvarsson, M. Odenberger, F. Johnsson, The chemical pulp mill as a flexible prosumer of  
1920 electricity. *Energy conversion and Management: X* **20**, 100401 (2023)
- 1921 [126] K. Kuparinen, E. Vakkilainen, Green pulp mill: renewable alternatives to fossil fuels in lime  
1922 kiln operations. *BioResources* **12**(2), 4031–4048 (2017)
- 1923 [127] F.H. Joyo, B. Nastasi, D.A. Garcia, Decarbonization pathways for the pulp and paper industry:  
1924 A comprehensive review. *Renewable and Sustainable Energy Reviews* **223**, 116070 (2025)
- 1925 [128] IEA. Paper (2023). URL <https://www.iea.org/energy-system/industry/paper>. Accessed: 2026-  
1926 02-10
- 1927 [129] Eurostat. Oil and petroleum products - a statistical overview (2025). URL  
1928 [https://ec.europa.eu/eurostat/statistics-explained/index.php?title=Oil\\_and\\_petroleum\\_  
1929 products\\_-\\_a\\_statistical\\_overview](https://ec.europa.eu/eurostat/statistics-explained/index.php?title=Oil_and_petroleum_products_-_a_statistical_overview). Accessed: 2026-02-10
- 1930 [130] M. Zanon-Zotin, L.B. Baptista, R. Draeger, P.R. Rochedo, A. Szklo, R. Schaeffer, Unad-  
1931 dressed non-energy use in the chemical industry can undermine fossil fuels phase-out. *Nature*  
1932 *Communications* **15**(1), 8050 (2024)
- 1933 [131] A. Nurdiawati, F. Urban, Decarbonising the refinery sector: A socio-technical analysis of  
1934 advanced biofuels, green hydrogen and carbon capture and storage developments in sweden.  
1935 *Energy Research & Social Science* **84**, 102358 (2022)
- 1936 [132] S.P. Pyl, C.M. Schietekat, M.F. Reyniers, R. Abhari, G.B. Marin, K.M. Van Geem, Biomass  
1937 to olefins: Cracking of renewable naphtha. *Chemical engineering journal* **176**, 178–187 (2011)
- 1938 [133] DNV. Energy transition outlook 20255. maritime forecast to 2050 (2026). Accessed: 2026-02-10
- 1939 [134] Ricardo Energy & Environment. Study on the readiness and availability of low- and zero-  
1940 carbon ship technology and marine fuels. Report prepared for the International Maritime  
1941 Organization (IMO) (2023). URL [https://wwwcdn.imo.org/localresources/en/MediaCentre/  
1942 WhatsNew/Documents/MEPC80.INF10.pdf](https://wwwcdn.imo.org/localresources/en/MediaCentre/WhatsNew/Documents/MEPC80.INF10.pdf). Accessed 10 February 2026

- 1943 [135] C. Eauci, C. McKinlay, A. Karan. The future of maritime fuels (2023). URL  
 1944 [https://maritime.lr.org/1/941163/2023-09-04/86cyj/941163/1693881339KV19NyGO/  
 1945 LR\\_Fuel\\_Mix\\_Report\\_v1.pdf](https://maritime.lr.org/1/941163/2023-09-04/86cyj/941163/1693881339KV19NyGO/LR_Fuel_Mix_Report_v1.pdf). Accessed: 2026-02-10
- 1946 [136] Council of the European Union. Fit for 55 (2025). URL [https://www.consilium.europa.eu/en/  
 1947 policies/fit-for-55/](https://www.consilium.europa.eu/en/policies/fit-for-55/). Accessed: 2025-09-30
- 1948 [137] J. Abrell. Documentation for the european union transaction log database (2021). Database  
 1949 documentation
- 1950 [138] European Commission, Directorate-General for Climate Action. Update of benchmark values  
 1951 for the years 2021–2025 of phase iv of the EU ETS (2021). URL [https://climate.ec.europa.eu/  
 1952 system/files/2021-10/policy\\_ets\\_allowances\\_bm\\_curve\\_factsheets\\_en.pdf](https://climate.ec.europa.eu/system/files/2021-10/policy_ets_allowances_bm_curve_factsheets_en.pdf). Accessed: 2025-01-10
- 1953 [139] M. Neuwirth, T. Fleiter, P. Manz, R. Hofmann, The future potential hydrogen demand in  
 1954 energy-intensive industries—a site-specific approach applied to germany. *Energy Conversion and  
 1955 Management* **252**, 115052 (2022)
- 1956 [140] S. Kiemel, R. Mieke, S. Glöser-Chahoud, A. Sauer, Proposed method for identifying industrial  
 1957 hydrogen demands—structural basics of a transferable procedure model. *Journal of Cleaner  
 1958 Production* **457**, 142299 (2024)
- 1959 [141] European Commission - The Joint Research Centre: EU Science Hub. Energy and  
 1960 ghg reductions in the chemical industry via catalytic processes: Annexes (2013).  
 1961 URL [https://iea.blob.core.windows.net/assets/fc71e0ab-aef1-4d06-b9c2-caf293a91c6e/  
 1962 Technology\\_Roadmap\\_Catalytic\\_Processes\\_Annexes.pdf](https://iea.blob.core.windows.net/assets/fc71e0ab-aef1-4d06-b9c2-caf293a91c6e/Technology_Roadmap_Catalytic_Processes_Annexes.pdf). Accessed: 2025-01-10
- 1963 [142] NREL. Hydrogen conversion factors and fact cards (revised) (2013). URL [https://docs.nrel.  
 1964 gov/docs/gen/fy08/43061.pdf](https://docs.nrel.gov/docs/gen/fy08/43061.pdf). Accessed: 2025-09-30
- 1965 [143] E.S. Sman, B. van der Peerlings, L.A. Söffing, R.W.H. Brouwer, M.W. Adler, A. Jon-  
 1966 geling, C. Behrens, M. Kieffer, Destination 2050 – roadmap. Tech. rep., Netherlands  
 1967 Aerospace Center (NLR) (2025). URL [https://reports.nlr.nl/server/api/core/bitstreams/  
 1968 3051bcd9-5af9-4ac7-b39f-15fedd533980/content](https://reports.nlr.nl/server/api/core/bitstreams/3051bcd9-5af9-4ac7-b39f-15fedd533980/content). Accessed: 2025-07-10
- 1969 [144] Eurostat. Detailed air passenger transport routes by country (avia\_par). [https://ec.europa.eu/  
 1970 eurostat/databrowser/explore/all/transp?sort=category&lang=en&subtheme=avia.avia\\_go&  
 1971 display=list](https://ec.europa.eu/eurostat/databrowser/explore/all/transp?sort=category&lang=en&subtheme=avia.avia_go&display=list) (2024). Accessed: 2025-01-10
- 1972 [145] S. Beck, D. Fischer, A methodological framework for geospatial modelling of hydrogen demand  
 1973 in cities. *Energy Informatics* **6**(Suppl 1), 21 (2023)
- 1974 [146] Eurostat. Detailed tables per reporting country (main ports) by direction, partner entity, type  
 1975 of cargo, and nationality of vessel registration – annual data (2024). URL [https://ec.europa.  
 1976 eu/eurostat/databrowser/view/mar\\_go\\_am\\_se/default/table?lang=en](https://ec.europa.eu/eurostat/databrowser/view/mar_go_am_se/default/table?lang=en). Accessed: 2025-01-10
- 1977 [147] Freightwaves. How many gallons of fuel does a container ship carry? (2020). URL [https://  
 1978 www.freightwaves.com/news/how-many-gallons-of-fuel-does-a-container-ship-carry](https://www.freightwaves.com/news/how-many-gallons-of-fuel-does-a-container-ship-carry). Accessed:  
 1979 2025-09-30
- 1980 [148] Eurostat. Transport by type of good (country/regional flows from 2007 onwards)  
 1981 (2025). URL [https://ec.europa.eu/eurostat/databrowser/view/iww\\_go\\_atygoff/default/table?  
 1982 lang=en&category=iww.iww\\_go.iww\\_go\\_a](https://ec.europa.eu/eurostat/databrowser/view/iww_go_atygoff/default/table?lang=en&category=iww.iww_go.iww_go_a). Accessed: 2025-09-30
- 1983 [149] Eurostat. Freight loaded and unloaded in ports for inland waterway transport (2024).  
 1984 URL [https://ec.europa.eu/eurostat/databrowser/product/page/IWW\\_GO\\_APORT](https://ec.europa.eu/eurostat/databrowser/product/page/IWW_GO_APORT). Accessed:  
 1985 2025-01-10
- 1986 [150] Eurostat. Territorialised road freight transport, by transport coverage – annual data  
 1987 (2024). URL [https://ec.europa.eu/eurostat/databrowser/view/road\\_tert\\_go/default/table?](https://ec.europa.eu/eurostat/databrowser/view/road_tert_go/default/table?)

- 1988 [lang=en&category=road.road\\_tert](#). Accessed: 2025-01-10
- 1989 [151] Hyundai Truck and Bus. Hyundai XCIENT (2020). URL [https://hyundaihm.com/wp-content/](https://hyundaihm.com/wp-content/uploads/2020/10/XCIENT-Fuel-Cellcatalog_print.pdf)  
1990 [uploads/2020/10/XCIENT-Fuel-Cellcatalog\\_print.pdf](https://hyundaihm.com/wp-content/uploads/2020/10/XCIENT-Fuel-Cellcatalog_print.pdf). Accessed: 2025-09-30
- 1991 [152] I. Gonzalez Hidalgo, K. Kanellopoulos, M. De Felice, A. Bocin, JRC Open Power Plants  
1992 Database (JRC-PPDB-OPEN). Tech. rep., European Commission, Joint Research Centre  
1993 (JRC) (2019)
- 1994 [153] Hotmaps. Heat density map (final energy demand for heating and dhw) of residen-  
1995 tial buildings in EU28 + switzerland, norway and iceland for the year 2015 (2020).  
1996 URL [https://gitlab.com/hotmaps/buildings/heat/heat\\_res\\_curr\\_density/-/blob/master/data/](https://gitlab.com/hotmaps/buildings/heat/heat_res_curr_density/-/blob/master/data/heat_res_curr_density_LAU2_ID_NUMBER.csv)  
1997 [heat\\_res\\_curr\\_density\\_LAU2\\_ID\\_NUMBER.csv](https://gitlab.com/hotmaps/buildings/heat/heat_res_curr_density/-/blob/master/data/heat_res_curr_density_LAU2_ID_NUMBER.csv). Accessed: 2025-01-10
- 1998 [154] GeoNames. cities.json (2021). URL <https://github.com/lmfmaier/cities-json>. GitHub  
1999 repository, Accessed: 2024-12-31
